# Supplementary material for: Whole genome detection of sequence and structural polymorphism in six diverse horses
Source: PLoS One. 2020 Apr 9;15(4):e0230899. doi: 10.1371/journal.pone.0230899 (PMC7144971; doi:10.1371/journal.pone.0230899)
Supplement: S7 Table — (XLSX) [file pone.0230899.s007.xlsx]

## Sheet: Shared CNVs
Chromosome	Start	End	Size (kb)	Number	Type	Horse	Chromosome	Start	End	Size (kb)	Type
chr1	10365770	10425322	59.552	1	loss	TWH	chr1	9984162	10819968	836	DUP/DEL
chr1	67505914	67531968	26.054	5	gain	TWH	chr1	67501561	67860528	359	DUP
chr1	67514922	67525773	10.851	6	gain	AMH	chr1	67501561	67860528	359	DUP
chr1	67525773	67583645	57.872	3	gain	AMH	chr1	67501561	67860528	359	DUP
chr1	67531968	67584076	52.108	3	gain	TWH	chr1	67501561	67860528	359	DUP
chr1	67586315	67662940	76.625	5	gain	ARB	chr1	67501561	67860528	359	DUP
chr1	98493606	98588614	95.008	1	loss	MM	chr1	98097768	98760399	663	DUP
chr1	98493775	98585725	91.95	1	loss	ARB	chr1	98097768	98760399	663	DUP
chr1	98494527	98588569	94.042	1	loss	AMH	chr1	98097768	98760399	663	DUP
chr1	98494578	98588413	93.835	1	loss	PER	chr1	98097768	98760399	663	DUP
chr1	98495286	98588336	93.05	1	loss	TWH	chr1	98097768	98760399	663	DUP
chr1	98496672	98586510	89.838	1	loss	CH	chr1	98097768	98760399	663	DUP
chr1	157267836	157272114	4.278	6	gain	CH	chr1	157183217	157305873	123	DUP
chr1	159227470	159239346	11.876	9	gain	MM	chr1	158843180	160751024	1908	DUP/DEL
chr1	159229815	159235945	6.13	38	gain	ARB	chr1	158843180	160751024	1908	DUP/DEL
chr1	159229952	159235314	5.362	39	gain	PER	chr1	158843180	160751024	1908	DUP/DEL
chr1	159230882	159238326	7.444	43	gain	TWH	chr1	158843180	160751024	1908	DUP/DEL
chr1	159231191	159234808	3.617	28	gain	AMH	chr1	158843180	160751024	1908	DUP/DEL
chr1	159231438	159235716	4.278	36	gain	CH	chr1	158843180	160751024	1908	DUP/DEL
chr1	159431870	159435592	3.722	12	gain	TWH	chr1	158843180	160751024	1908	DUP/DEL
chr1	159432105	159435170	3.065	12	gain	ARB	chr1	158843180	160751024	1908	DUP/DEL
chr1	160551644	160729784	178.14	0	loss	MM	chr1	158843180	160751024	1908	DUP/DEL
chr1	160552192	160745736	193.544	1	loss	TWH	chr1	158843180	160751024	1908	DUP/DEL
chr1	160561896	160750128	188.232	1	loss	CH	chr1	158843180	160751024	1908	DUP/DEL
chr1	160621391	160750079	128.688	1	loss	PER	chr1	158843180	160751024	1908	DUP/DEL
chr1	160970968	161028840	57.872	3	gain	AMH	chr1	160928610	163219245	2291	DUP/DEL
chr1	161028840	161220541	191.701	0	loss	AMH	chr1	160928610	163219245	2291	DUP/DEL
chr1	161042308	161219254	176.946	0	loss	PER	chr1	160928610	163219245	2291	DUP/DEL
chr1	161220541	161636496	415.955	3	gain	AMH	chr1	160928610	163219245	2291	DUP/DEL
chr1	162137090	162267726	130.636	1	loss	MM	chr1	160928610	163219245	2291	DUP/DEL
chr1	162137764	162264312	126.548	1	loss	TWH	chr1	160928610	163219245	2291	DUP/DEL
chr1	162138500	162230450	91.95	0	loss	ARB	chr1	160928610	163219245	2291	DUP/DEL
chr1	162138837	162262163	123.326	0	loss	PER	chr1	160928610	163219245	2291	DUP/DEL
chr1	162139259	162265854	126.595	1	loss	AMH	chr1	160928610	163219245	2291	DUP/DEL
chr1	162230450	162518560	288.11	1	loss	ARB	chr1	160928610	163219245	2291	DUP/DEL
chr1	179025744	179273868	248.124	1	loss	CH	chr1	178654451	179654891	1000	DUP
chr1	179027032	179269371	242.339	1	loss	AMH	chr1	178654451	179654891	1000	DUP
chr1	179028200	179266408	238.208	1	loss	TWH	chr1	178654451	179654891	1000	DUP
chr1	179029137	179270427	241.29	1	loss	PER	chr1	178654451	179654891	1000	DUP
chr1	179029715	179265720	236.005	1	loss	ARB	chr1	178654451	179654891	1000	DUP
chr1	179030700	179268220	237.52	1	loss	MM	chr1	178654451	179654891	1000	DUP
chr10	638078	670250	32.172	3	gain	PER	chr10	616001	1620519	1005	DUP/DEL
chr10	1115296	1155511	40.215	1	loss	PER	chr10	616001	1620519	1005	DUP/DEL
chr10	1116558	1150782	34.224	1	loss	CH	chr10	616001	1620519	1005	DUP/DEL
chr10	1117653	1157440	39.787	1	loss	AMH	chr10	616001	1620519	1005	DUP/DEL
chr10	1118725	1158570	39.845	1	loss	ARB	chr10	616001	1620519	1005	DUP/DEL
chr10	1120322	1157542	37.22	1	loss	TWH	chr10	616001	1620519	1005	DUP/DEL
chr10	1425120	1520128	95.008	1	loss	MM	chr10	616001	1620519	1005	DUP/DEL
chr10	1425225	1498785	73.56	1	loss	ARB	chr10	616001	1620519	1005	DUP/DEL
chr10	1436692	1518576	81.884	1	loss	TWH	chr10	616001	1620519	1005	DUP/DEL
chr10	11804744	11816620	11.876	4	gain	MM	chr10	9026404	28289288	19263	DUP/DEL
chr10	11805888	11813122	7.234	4	gain	AMH	chr10	9026404	28289288	19263	DUP/DEL
chr10	11806184	11813628	7.444	4	gain	TWH	chr10	9026404	28289288	19263	DUP/DEL
chr10	11806380	11812510	6.13	5	gain	ARB	chr10	9026404	28289288	19263	DUP/DEL
chr10	11807124	11812486	5.362	4	gain	PER	chr10	9026404	28289288	19263	DUP/DEL
chr10	11807280	11815836	8.556	5	gain	CH	chr10	9026404	28289288	19263	DUP/DEL
chr10	12203758	12207375	3.617	9	gain	AMH	chr10	9026404	28289288	19263	DUP/DEL
chr10	12220404	12232280	11.876	4	gain	MM	chr10	9026404	28289288	19263	DUP/DEL
chr10	12480680	12483745	3.065	4	gain	ARB	chr10	9026404	28289288	19263	DUP/DEL
chr10	12482736	12488098	5.362	5	gain	PER	chr10	9026404	28289288	19263	DUP/DEL
chr10	12483745	12489875	6.13	7	gain	ARB	chr10	9026404	28289288	19263	DUP/DEL
chr10	12508265	12517460	9.195	8	gain	ARB	chr10	9026404	28289288	19263	DUP/DEL
chr10	12509546	12517589	8.043	7	gain	PER	chr10	9026404	28289288	19263	DUP/DEL
chr10	12581825	12594085	12.26	9	gain	ARB	chr10	9026404	28289288	19263	DUP/DEL
chr10	12584082	12610136	26.054	8	gain	TWH	chr10	9026404	28289288	19263	DUP/DEL
chr10	12584614	12592657	8.043	6	gain	PER	chr10	9026404	28289288	19263	DUP/DEL
chr10	12664580	12673775	9.195	1	loss	ARB	chr10	9026404	28289288	19263	DUP/DEL
chr10	12989780	13008390	18.61	1	loss	TWH	chr10	9026404	28289288	19263	DUP/DEL
chr10	13007860	13026250	18.39	4	gain	ARB	chr10	9026404	28289288	19263	DUP/DEL
chr10	13008212	13024298	16.086	4	gain	PER	chr10	9026404	28289288	19263	DUP/DEL
chr10	13008390	13067942	59.552	3	gain	TWH	chr10	9026404	28289288	19263	DUP/DEL
chr10	13009398	13022232	12.834	4	gain	CH	chr10	9026404	28289288	19263	DUP/DEL
chr10	13010158	13022034	11.876	4	gain	MM	chr10	9026404	28289288	19263	DUP/DEL
chr10	13026250	13032380	6.13	1	loss	ARB	chr10	9026404	28289288	19263	DUP/DEL
chr10	13032380	13059965	27.585	4	gain	ARB	chr10	9026404	28289288	19263	DUP/DEL
chr10	13033910	13057662	23.752	4	gain	MM	chr10	9026404	28289288	19263	DUP/DEL
chr10	13035022	13059151	24.129	4	gain	PER	chr10	9026404	28289288	19263	DUP/DEL
chr10	13035066	13060734	25.668	5	gain	CH	chr10	9026404	28289288	19263	DUP/DEL
chr10	13067942	13283818	215.876	1	loss	TWH	chr10	9026404	28289288	19263	DUP/DEL
chr10	13133525	13234670	101.145	1	loss	ARB	chr10	9026404	28289288	19263	DUP/DEL
chr10	13332750	13341945	9.195	4	gain	ARB	chr10	9026404	28289288	19263	DUP/DEL
chr10	13449570	13467384	17.814	3	gain	MM	chr10	9026404	28289288	19263	DUP/DEL
chr10	13451623	13466091	14.468	3	gain	AMH	chr10	9026404	28289288	19263	DUP/DEL
chr10	13453258	13463982	10.724	4	gain	PER	chr10	9026404	28289288	19263	DUP/DEL
chr10	13455030	13466196	11.166	4	gain	TWH	chr10	9026404	28289288	19263	DUP/DEL
chr10	13455350	13464545	9.195	4	gain	ARB	chr10	9026404	28289288	19263	DUP/DEL
chr10	14304355	14313550	9.195	3	gain	ARB	chr10	9026404	28289288	19263	DUP/DEL
chr10	14313550	14319680	6.13	5	gain	ARB	chr10	9026404	28289288	19263	DUP/DEL
chr10	14319680	14331940	12.26	3	gain	ARB	chr10	9026404	28289288	19263	DUP/DEL
chr10	14331940	14344200	12.26	5	gain	ARB	chr10	9026404	28289288	19263	DUP/DEL
chr10	14463995	14480081	16.086	3	gain	PER	chr10	9026404	28289288	19263	DUP/DEL
chr10	14489702	14511404	21.702	1	loss	AMH	chr10	9026404	28289288	19263	DUP/DEL
chr10	14592465	14598595	6.13	0	loss	ARB	chr10	9026404	28289288	19263	DUP/DEL
chr10	14653765	14669090	15.325	1	loss	ARB	chr10	9026404	28289288	19263	DUP/DEL
chr10	15010550	15064805	54.255	0	loss	AMH	chr10	9026404	28289288	19263	DUP/DEL
chr10	15010826	15062934	52.108	0	loss	TWH	chr10	9026404	28289288	19263	DUP/DEL
chr10	15011264	15064706	53.442	0	loss	MM	chr10	9026404	28289288	19263	DUP/DEL
chr10	15012370	15064475	52.105	1	loss	ARB	chr10	9026404	28289288	19263	DUP/DEL
chr10	15016281	15064539	48.258	0	loss	PER	chr10	9026404	28289288	19263	DUP/DEL
chr10	15248784	15290350	41.566	1	loss	MM	chr10	9026404	28289288	19263	DUP/DEL
chr10	15249272	15292676	43.404	1	loss	AMH	chr10	9026404	28289288	19263	DUP/DEL
chr10	15251440	15291285	39.845	1	loss	ARB	chr10	9026404	28289288	19263	DUP/DEL
chr10	15256478	15293698	37.22	1	loss	TWH	chr10	9026404	28289288	19263	DUP/DEL
chr10	15257571	15292424	34.853	1	loss	PER	chr10	9026404	28289288	19263	DUP/DEL
chr10	15673342	15684508	11.166	4	gain	TWH	chr10	9026404	28289288	19263	DUP/DEL
chr10	15675807	15683850	8.043	6	gain	PER	chr10	9026404	28289288	19263	DUP/DEL
chr10	16636820	16661340	24.52	4	gain	ARB	chr10	9026404	28289288	19263	DUP/DEL
chr10	16815433	16833518	18.085	4	gain	AMH	chr10	9026404	28289288	19263	DUP/DEL
chr10	16816416	16834230	17.814	4	gain	MM	chr10	9026404	28289288	19263	DUP/DEL
chr10	16816818	16821096	4.278	5	gain	CH	chr10	9026404	28289288	19263	DUP/DEL
chr10	16817655	16820720	3.065	5	gain	ARB	chr10	9026404	28289288	19263	DUP/DEL
chr10	16829652	16842486	12.834	6	gain	CH	chr10	9026404	28289288	19263	DUP/DEL
chr10	16830884	16842050	11.166	3	gain	TWH	chr10	9026404	28289288	19263	DUP/DEL
chr10	16831318	16842042	10.724	4	gain	PER	chr10	9026404	28289288	19263	DUP/DEL
chr10	16832980	16839110	6.13	5	gain	ARB	chr10	9026404	28289288	19263	DUP/DEL
chr10	16833518	16840752	7.234	7	gain	AMH	chr10	9026404	28289288	19263	DUP/DEL
chr10	16839110	16842175	3.065	3	gain	ARB	chr10	9026404	28289288	19263	DUP/DEL
chr10	20557356	20587046	29.69	4	gain	MM	chr10	9026404	28289288	19263	DUP/DEL
chr10	20559028	20587964	28.936	3	gain	AMH	chr10	9026404	28289288	19263	DUP/DEL
chr10	20560020	20584540	24.52	4	gain	ARB	chr10	9026404	28289288	19263	DUP/DEL
chr10	20560068	20585736	25.668	4	gain	CH	chr10	9026404	28289288	19263	DUP/DEL
chr10	20560328	20586382	26.054	4	gain	TWH	chr10	9026404	28289288	19263	DUP/DEL
chr10	20560589	20584718	24.129	4	gain	PER	chr10	9026404	28289288	19263	DUP/DEL
chr10	20786899	20804984	18.085	3	gain	AMH	chr10	9026404	28289288	19263	DUP/DEL
chr10	20796025	20805220	9.195	4	gain	ARB	chr10	9026404	28289288	19263	DUP/DEL
chr10	20966478	20970756	4.278	5	gain	CH	chr10	9026404	28289288	19263	DUP/DEL
chr10	20967665	20973795	6.13	4	gain	ARB	chr10	9026404	28289288	19263	DUP/DEL
chr10	21256342	21267508	11.166	0	loss	TWH	chr10	9026404	28289288	19263	DUP/DEL
chr10	21257382	21270216	12.834	0	loss	CH	chr10	9026404	28289288	19263	DUP/DEL
chr10	21258040	21269916	11.876	0	loss	MM	chr10	9026404	28289288	19263	DUP/DEL
chr10	21258840	21268035	9.195	0	loss	ARB	chr10	9026404	28289288	19263	DUP/DEL
chr10	21611315	21632770	21.455	5	gain	ARB	chr10	9026404	28289288	19263	DUP/DEL
chr10	21611541	21632989	21.448	4	gain	PER	chr10	9026404	28289288	19263	DUP/DEL
chr10	21612456	21633846	21.39	5	gain	CH	chr10	9026404	28289288	19263	DUP/DEL
chr10	22164510	22224062	59.552	1	loss	TWH	chr10	9026404	28289288	19263	DUP/DEL
chr10	22164976	22226465	61.489	1	loss	AMH	chr10	9026404	28289288	19263	DUP/DEL
chr10	22166080	22224315	58.235	1	loss	ARB	chr10	9026404	28289288	19263	DUP/DEL
chr10	22166508	22228171	61.663	1	loss	PER	chr10	9026404	28289288	19263	DUP/DEL
chr10	22166554	22315004	148.45	1	loss	MM	chr10	9026404	28289288	19263	DUP/DEL
chr10	22168596	22318326	149.73	1	loss	CH	chr10	9026404	28289288	19263	DUP/DEL
chr10	22246394	22313390	66.996	1	loss	TWH	chr10	9026404	28289288	19263	DUP/DEL
chr10	22246938	22313963	67.025	1	loss	PER	chr10	9026404	28289288	19263	DUP/DEL
chr10	22248167	22273486	25.319	1	loss	AMH	chr10	9026404	28289288	19263	DUP/DEL
chr10	22248835	22273355	24.52	1	loss	ARB	chr10	9026404	28289288	19263	DUP/DEL
chr10	22273355	22282550	9.195	3	gain	ARB	chr10	9026404	28289288	19263	DUP/DEL
chr10	22282550	22319330	36.78	1	loss	ARB	chr10	9026404	28289288	19263	DUP/DEL
chr10	22287954	22316890	28.936	1	loss	AMH	chr10	9026404	28289288	19263	DUP/DEL
chr10	22724156	22852844	128.688	1	loss	PER	chr10	9026404	28289288	19263	DUP/DEL
chr10	22724726	22849424	124.698	1	loss	MM	chr10	9026404	28289288	19263	DUP/DEL
chr10	22725611	22852206	126.595	1	loss	AMH	chr10	9026404	28289288	19263	DUP/DEL
chr10	22726532	22853080	126.548	1	loss	TWH	chr10	9026404	28289288	19263	DUP/DEL
chr10	22726975	22852640	125.665	1	loss	ARB	chr10	9026404	28289288	19263	DUP/DEL
chr10	22953785	22956850	3.065	4	gain	ARB	chr10	9026404	28289288	19263	DUP/DEL
chr10	23412841	23452628	39.787	1	loss	AMH	chr10	9026404	28289288	19263	DUP/DEL
chr10	23413173	23456069	42.896	1	loss	PER	chr10	9026404	28289288	19263	DUP/DEL
chr10	23431348	23455100	23.752	1	loss	MM	chr10	9026404	28289288	19263	DUP/DEL
chr10	23433712	23448600	14.888	1	loss	TWH	chr10	9026404	28289288	19263	DUP/DEL
chr10	23434990	23456445	21.455	1	loss	ARB	chr10	9026404	28289288	19263	DUP/DEL
chr10	24309857	24371346	61.489	1	loss	AMH	chr10	9026404	28289288	19263	DUP/DEL
chr10	24310172	24375490	65.318	1	loss	MM	chr10	9026404	28289288	19263	DUP/DEL
chr10	24311308	24372971	61.663	1	loss	PER	chr10	9026404	28289288	19263	DUP/DEL
chr10	24311580	24372880	61.3	1	loss	ARB	chr10	9026404	28289288	19263	DUP/DEL
chr10	26024315	26042400	18.085	3	gain	AMH	chr10	9026404	28289288	19263	DUP/DEL
chr10	26024467	26040553	16.086	6	gain	PER	chr10	9026404	28289288	19263	DUP/DEL
chr10	26024915	26040240	15.325	4	gain	ARB	chr10	9026404	28289288	19263	DUP/DEL
chr10	26735995	26772775	36.78	1	loss	ARB	chr10	9026404	28289288	19263	DUP/DEL
chr10	27118315	27131720	13.405	1	loss	PER	chr10	9026404	28289288	19263	DUP/DEL
chr10	27118492	27137102	18.61	1	loss	TWH	chr10	9026404	28289288	19263	DUP/DEL
chr10	27119120	27137510	18.39	1	loss	ARB	chr10	9026404	28289288	19263	DUP/DEL
chr10	27213854	27243544	29.69	1	loss	MM	chr10	9026404	28289288	19263	DUP/DEL
chr10	27215264	27245040	29.776	1	loss	TWH	chr10	9026404	28289288	19263	DUP/DEL
chr10	27216636	27242304	25.668	1	loss	CH	chr10	9026404	28289288	19263	DUP/DEL
chr10	27217200	27244785	27.585	1	loss	ARB	chr10	9026404	28289288	19263	DUP/DEL
chr10	27217512	27244322	26.81	1	loss	PER	chr10	9026404	28289288	19263	DUP/DEL
chr10	27217925	27243244	25.319	1	loss	AMH	chr10	9026404	28289288	19263	DUP/DEL
chr10	39314755	39440420	125.665	1	loss	ARB	chr10	39138468	39510208	372	DEL
chr10	39314820	39438882	124.062	1	loss	CH	chr10	39138468	39510208	372	DEL
chr10	39315486	39438312	122.826	1	loss	TWH	chr10	39138468	39510208	372	DEL
chr10	39316865	39440191	123.326	1	loss	PER	chr10	39138468	39510208	372	DEL
chr10	39320407	39439768	119.361	1	loss	AMH	chr10	39138468	39510208	372	DEL
chr10	39321436	39440196	118.76	1	loss	MM	chr10	39138468	39510208	372	DEL
chr10	52818510	52824448	5.938	4	gain	MM	chr10	52702313	52959514	257	DEL
chr10	52818902	52826346	7.444	4	gain	TWH	chr10	52702313	52959514	257	DEL
chr10	52819051	52826285	7.234	4	gain	AMH	chr10	52702313	52959514	257	DEL
chr10	52819145	52825275	6.13	5	gain	ARB	chr10	52702313	52959514	257	DEL
chr10	52820466	52824744	4.278	7	gain	CH	chr10	52702313	52959514	257	DEL
chr10	52821062	52826424	5.362	4	gain	PER	chr10	52702313	52959514	257	DEL
chr11	1206450	1209131	2.681	5	gain	PER	chr11	674174	8378304	7704	DUP/DEL
chr11	2885868	2891806	5.938	4	gain	MM	chr11	674174	8378304	7704	DUP/DEL
chr11	2887650	2891928	4.278	4	gain	CH	chr11	674174	8378304	7704	DUP/DEL
chr11	2897744	2903682	5.938	5	gain	MM	chr11	674174	8378304	7704	DUP/DEL
chr11	2899438	2903160	3.722	4	gain	TWH	chr11	674174	8378304	7704	DUP/DEL
chr11	3042935	3104598	61.663	1	loss	PER	chr11	674174	8378304	7704	DUP/DEL
chr11	4029338	4058274	28.936	1	loss	AMH	chr11	674174	8378304	7704	DUP/DEL
chr11	4029543	4059034	29.491	1	loss	PER	chr11	674174	8378304	7704	DUP/DEL
chr11	4029876	4055544	25.668	1	loss	CH	chr11	674174	8378304	7704	DUP/DEL
chr11	4030475	4058060	27.585	1	loss	ARB	chr11	674174	8378304	7704	DUP/DEL
chr11	4030926	4056980	26.054	1	loss	TWH	chr11	674174	8378304	7704	DUP/DEL
chr11	4031902	4055654	23.752	1	loss	MM	chr11	674174	8378304	7704	DUP/DEL
chr11	9222640	9236045	13.405	1	loss	PER	chr11	8694998	9266645	572	DUP
chr11	20367340	20373278	5.938	8	gain	MM	chr11	19176998	21578141	2401	DUP
chr11	20370506	20374228	3.722	7	gain	TWH	chr11	19176998	21578141	2401	DUP
chr11	20371836	20376114	4.278	8	gain	CH	chr11	19176998	21578141	2401	DUP
chr11	21430725	21452427	21.702	3	gain	AMH	chr11	19176998	21578141	2401	DUP
chr11	21431914	21453362	21.448	3	gain	PER	chr11	19176998	21578141	2401	DUP
chr11	38005752	38014308	8.556	4	gain	CH	chr11	37764911	39796118	2031	DUP/DEL
chr11	38005856	38011218	5.362	4	gain	PER	chr11	37764911	39796118	2031	DUP/DEL
chr11	38006000	38012130	6.13	4	gain	ARB	chr11	37764911	39796118	2031	DUP/DEL
chr11	41861134	41995184	134.05	3	gain	PER	chr11	41276368	42145958	870	DUP/DEL
chr11	41861334	41950662	89.328	3	gain	TWH	chr11	41276368	42145958	870	DUP/DEL
chr11	41861770	41883225	21.455	4	gain	ARB	chr11	41276368	42145958	870	DUP/DEL
chr11	41863158	42025923	162.765	3	gain	AMH	chr11	41276368	42145958	870	DUP/DEL
chr11	41883225	41950655	67.43	3	gain	ARB	chr11	41276368	42145958	870	DUP/DEL
chr11	41924400	41967180	42.78	1	loss	CH	chr11	41276368	42145958	870	DUP/DEL
chr11	41950655	41969045	18.39	1	loss	ARB	chr11	41276368	42145958	870	DUP/DEL
chr11	41969045	41987435	18.39	3	gain	ARB	chr11	41276368	42145958	870	DUP/DEL
chr11	41969272	42021380	52.108	3	gain	TWH	chr11	41276368	42145958	870	DUP/DEL
chr11	41987435	41993565	6.13	5	gain	ARB	chr11	41276368	42145958	870	DUP/DEL
chr11	41993565	42021150	27.585	3	gain	ARB	chr11	41276368	42145958	870	DUP/DEL
chr11	42021150	42039540	18.39	5	gain	ARB	chr11	41276368	42145958	870	DUP/DEL
chr11	42021380	42043712	22.332	4	gain	TWH	chr11	41276368	42145958	870	DUP/DEL
chr11	42025923	42036774	10.851	4	gain	AMH	chr11	41276368	42145958	870	DUP/DEL
chr11	42039540	42131490	91.95	3	gain	ARB	chr11	41276368	42145958	870	DUP/DEL
chr11	42123582	42134433	10.851	3	gain	AMH	chr11	41276368	42145958	870	DUP/DEL
chr11	47319922	47337736	17.814	4	gain	MM	chr11	47119650	47479822	360	DUP/DEL
chr11	47321508	47336396	14.888	4	gain	TWH	chr11	47119650	47479822	360	DUP/DEL
chr11	47323600	47335860	12.26	4	gain	ARB	chr11	47119650	47479822	360	DUP/DEL
chr11	47325012	47335736	10.724	4	gain	PER	chr11	47119650	47479822	360	DUP/DEL
chr11	49808754	49813032	4.278	4	gain	CH	chr11	49372831	49814590	442	DUP
chr11	59231992	59260928	28.936	1	loss	AMH	chr11	58959202	59437569	478	DUP/DEL
chr11	61029634	61037078	7.444	18	gain	TWH	chr11	60670762	61308211	637	DUP/DEL
chr11	61029641	61036875	7.234	19	gain	AMH	chr11	60670762	61308211	637	DUP/DEL
chr11	61029948	61038504	8.556	15	gain	CH	chr11	60670762	61308211	637	DUP/DEL
chr11	61030280	61036410	6.13	21	gain	ARB	chr11	60670762	61308211	637	DUP/DEL
chr11	61030284	61035646	5.362	25	gain	PER	chr11	60670762	61308211	637	DUP/DEL
chr11	61030764	61036702	5.938	23	gain	MM	chr11	60670762	61308211	637	DUP/DEL
chr11	61076255	61091580	15.325	15	gain	ARB	chr11	60670762	61308211	637	DUP/DEL
chr11	61076662	61091130	14.468	16	gain	AMH	chr11	60670762	61308211	637	DUP/DEL
chr11	61077006	61089840	12.834	23	gain	CH	chr11	60670762	61308211	637	DUP/DEL
chr11	61078020	61089186	11.166	27	gain	TWH	chr11	60670762	61308211	637	DUP/DEL
chr11	61078268	61090144	11.876	26	gain	MM	chr11	60670762	61308211	637	DUP/DEL
chr11	61078542	61089266	10.724	22	gain	PER	chr11	60670762	61308211	637	DUP/DEL
chr11	61089186	61096630	7.444	5	gain	TWH	chr11	60670762	61308211	637	DUP/DEL
chr11	61089266	61097309	8.043	5	gain	PER	chr11	60670762	61308211	637	DUP/DEL
chr11	61089840	61098396	8.556	4	gain	CH	chr11	60670762	61308211	637	DUP/DEL
chr11	61090144	61096082	5.938	5	gain	MM	chr11	60670762	61308211	637	DUP/DEL
chr11	61091130	61098364	7.234	4	gain	AMH	chr11	60670762	61308211	637	DUP/DEL
chr11	61091580	61097710	6.13	5	gain	ARB	chr11	60670762	61308211	637	DUP/DEL
chr11	61129481	61134843	5.362	4	gain	PER	chr11	60670762	61308211	637	DUP/DEL
chr11	61130917	61149002	18.085	7	gain	AMH	chr11	60670762	61308211	637	DUP/DEL
chr11	61131425	61134490	3.065	4	gain	ARB	chr11	60670762	61308211	637	DUP/DEL
chr11	61131710	61137648	5.938	4	gain	MM	chr11	60670762	61308211	637	DUP/DEL
chr11	61132620	61136898	4.278	5	gain	CH	chr11	60670762	61308211	637	DUP/DEL
chr11	61133850	61148738	14.888	9	gain	TWH	chr11	60670762	61308211	637	DUP/DEL
chr11	61134490	61159010	24.52	9	gain	ARB	chr11	60670762	61308211	637	DUP/DEL
chr11	61134843	61148248	13.405	8	gain	PER	chr11	60670762	61308211	637	DUP/DEL
chr11	61136898	61171122	34.224	20	gain	CH	chr11	60670762	61308211	637	DUP/DEL
chr11	61137648	61173276	35.628	16	gain	MM	chr11	60670762	61308211	637	DUP/DEL
chr11	61148248	61169696	21.448	22	gain	PER	chr11	60670762	61308211	637	DUP/DEL
chr11	61148738	61171070	22.332	24	gain	TWH	chr11	60670762	61308211	637	DUP/DEL
chr11	61149002	61170704	21.702	24	gain	AMH	chr11	60670762	61308211	637	DUP/DEL
chr11	61159010	61168205	9.195	32	gain	ARB	chr11	60670762	61308211	637	DUP/DEL
chr12	2583068	2594234	11.166	18	gain	TWH	chr12	2563204	2969343	406	DUP
chr12	2583795	2596055	12.26	8	gain	ARB	chr12	2563204	2969343	406	DUP
chr12	2584484	2595208	10.724	18	gain	PER	chr12	2563204	2969343	406	DUP
chr12	4037840	4097220	59.38	0	loss	MM	chr12	3990893	4199960	209	DEL
chr12	4123378	4166274	42.896	0	loss	PER	chr12	3990893	4199960	209	DEL
chr12	10177732	10367748	190.016	1	loss	MM	chr12	9158392	17707943	8550	DUP/DEL
chr12	10178238	10362705	184.467	1	loss	AMH	chr12	9158392	17707943	8550	DUP/DEL
chr12	10178865	10365830	186.965	1	loss	ARB	chr12	9158392	17707943	8550	DUP/DEL
chr12	10179670	10365770	186.1	1	loss	TWH	chr12	9158392	17707943	8550	DUP/DEL
chr12	10181640	10365594	183.954	1	loss	CH	chr12	9158392	17707943	8550	DUP/DEL
chr12	12342030	12846834	504.804	1	loss	CH	chr12	9158392	17707943	8550	DUP/DEL
chr12	12342152	12625024	282.872	1	loss	TWH	chr12	9158392	17707943	8550	DUP/DEL
chr12	12343324	12675768	332.444	1	loss	PER	chr12	9158392	17707943	8550	DUP/DEL
chr12	12344821	12833116	488.295	1	loss	AMH	chr12	9158392	17707943	8550	DUP/DEL
chr12	12345102	12814204	469.102	1	loss	MM	chr12	9158392	17707943	8550	DUP/DEL
chr12	12345820	12676840	331.02	0	loss	ARB	chr12	9158392	17707943	8550	DUP/DEL
chr12	12625024	12677132	52.108	4	gain	TWH	chr12	9158392	17707943	8550	DUP/DEL
chr12	12675768	12812499	136.731	0	loss	PER	chr12	9158392	17707943	8550	DUP/DEL
chr12	12676840	12814765	137.925	1	loss	ARB	chr12	9158392	17707943	8550	DUP/DEL
chr12	12677132	12848344	171.212	1	loss	TWH	chr12	9158392	17707943	8550	DUP/DEL
chr12	12814204	13247678	433.474	5	gain	MM	chr12	9158392	17707943	8550	DUP/DEL
chr12	12814765	13249995	435.23	4	gain	ARB	chr12	9158392	17707943	8550	DUP/DEL
chr12	12833116	13249071	415.955	3	gain	AMH	chr12	9158392	17707943	8550	DUP/DEL
chr12	12946549	12957273	10.724	5	gain	PER	chr12	9158392	17707943	8550	DUP/DEL
chr12	13253244	13484256	231.012	1	loss	CH	chr12	9158392	17707943	8550	DUP/DEL
chr12	13254042	13481084	227.042	1	loss	TWH	chr12	9158392	17707943	8550	DUP/DEL
chr12	13254864	13485430	230.566	1	loss	PER	chr12	9158392	17707943	8550	DUP/DEL
chr12	13482935	13611665	128.73	3	gain	ARB	chr12	9158392	17707943	8550	DUP/DEL
chr12	13484176	13997790	513.614	3	gain	AMH	chr12	9158392	17707943	8550	DUP/DEL
chr12	13485198	14013680	528.482	4	gain	MM	chr12	9158392	17707943	8550	DUP/DEL
chr12	13611665	14007050	395.385	4	gain	ARB	chr12	9158392	17707943	8550	DUP/DEL
chr12	14007050	14151105	144.055	3	gain	ARB	chr12	9158392	17707943	8550	DUP/DEL
chr12	14013680	14209634	195.954	3	gain	MM	chr12	9158392	17707943	8550	DUP/DEL
chr12	14094017	14174447	80.43	0	loss	PER	chr12	9158392	17707943	8550	DUP/DEL
chr12	14151044	14232928	81.884	0	loss	TWH	chr12	9158392	17707943	8550	DUP/DEL
chr12	14151105	14230795	79.69	1	loss	ARB	chr12	9158392	17707943	8550	DUP/DEL
chr12	14151624	14211516	59.892	0	loss	CH	chr12	9158392	17707943	8550	DUP/DEL
chr12	14209634	14328394	118.76	4	gain	MM	chr12	9158392	17707943	8550	DUP/DEL
chr12	14230795	14331940	101.145	4	gain	ARB	chr12	9158392	17707943	8550	DUP/DEL
chr12	14328394	14453092	124.698	1	loss	MM	chr12	9158392	17707943	8550	DUP/DEL
chr12	14332626	14423780	91.154	1	loss	PER	chr12	9158392	17707943	8550	DUP/DEL
chr12	14333422	14422750	89.328	1	loss	TWH	chr12	9158392	17707943	8550	DUP/DEL
chr12	14423890	14543425	119.535	4	gain	ARB	chr12	9158392	17707943	8550	DUP/DEL
chr12	14453092	14542162	89.07	4	gain	MM	chr12	9158392	17707943	8550	DUP/DEL
chr12	14543425	14653765	110.34	1	loss	ARB	chr12	9158392	17707943	8550	DUP/DEL
chr12	14555149	14651665	96.516	0	loss	PER	chr12	9158392	17707943	8550	DUP/DEL
chr12	14556742	14642348	85.606	0	loss	TWH	chr12	9158392	17707943	8550	DUP/DEL
chr12	14651665	14678475	26.81	3	gain	PER	chr12	9158392	17707943	8550	DUP/DEL
chr12	14654984	14702488	47.504	5	gain	MM	chr12	9158392	17707943	8550	DUP/DEL
chr12	14677786	14699488	21.702	6	gain	AMH	chr12	9158392	17707943	8550	DUP/DEL
chr12	14677818	14699208	21.39	5	gain	CH	chr12	9158392	17707943	8550	DUP/DEL
chr12	14678475	14699923	21.448	5	gain	PER	chr12	9158392	17707943	8550	DUP/DEL
chr12	14679568	14698178	18.61	5	gain	TWH	chr12	9158392	17707943	8550	DUP/DEL
chr12	14698178	15129930	431.752	1	loss	TWH	chr12	9158392	17707943	8550	DUP/DEL
chr12	14699208	15490638	791.43	1	loss	CH	chr12	9158392	17707943	8550	DUP/DEL
chr12	14699488	16265649	1566.16	1	loss	AMH	chr12	9158392	17707943	8550	DUP/DEL
chr12	14702488	15124086	421.598	3	gain	MM	chr12	9158392	17707943	8550	DUP/DEL
chr12	14724260	14745715	21.455	0	loss	ARB	chr12	9158392	17707943	8550	DUP/DEL
chr12	14745715	14791690	45.975	4	gain	ARB	chr12	9158392	17707943	8550	DUP/DEL
chr12	14791690	14834600	42.91	1	loss	ARB	chr12	9158392	17707943	8550	DUP/DEL
chr12	14834600	14929615	95.015	4	gain	ARB	chr12	9158392	17707943	8550	DUP/DEL
chr12	15128883	15136926	8.043	10	gain	PER	chr12	9158392	17707943	8550	DUP/DEL
chr12	15129930	15137374	7.444	5	gain	TWH	chr12	9158392	17707943	8550	DUP/DEL
chr12	15137374	15364416	227.042	1	loss	TWH	chr12	9158392	17707943	8550	DUP/DEL
chr12	15159490	15266765	107.275	3	gain	ARB	chr12	9158392	17707943	8550	DUP/DEL
chr12	15163736	15257571	93.835	0	loss	PER	chr12	9158392	17707943	8550	DUP/DEL
chr12	15361606	15628816	267.21	4	gain	MM	chr12	9158392	17707943	8550	DUP/DEL
chr12	15367910	15631500	263.59	4	gain	ARB	chr12	9158392	17707943	8550	DUP/DEL
chr12	15490638	15631812	141.174	3	gain	CH	chr12	9158392	17707943	8550	DUP/DEL
chr12	15494686	15628678	133.992	4	gain	TWH	chr12	9158392	17707943	8550	DUP/DEL
chr12	15628678	15799890	171.212	1	loss	TWH	chr12	9158392	17707943	8550	DUP/DEL
chr12	15628816	15801018	172.202	1	loss	MM	chr12	9158392	17707943	8550	DUP/DEL
chr12	15630230	15758918	128.688	1	loss	PER	chr12	9158392	17707943	8550	DUP/DEL
chr12	15631500	15735710	104.21	1	loss	ARB	chr12	9158392	17707943	8550	DUP/DEL
chr12	15631812	15781542	149.73	1	loss	CH	chr12	9158392	17707943	8550	DUP/DEL
chr12	15799890	15829666	29.776	4	gain	TWH	chr12	9158392	17707943	8550	DUP/DEL
chr12	15801018	15890088	89.07	3	gain	MM	chr12	9158392	17707943	8550	DUP/DEL
chr12	15890088	16056352	166.264	4	gain	MM	chr12	9158392	17707943	8550	DUP/DEL
chr12	15896662	15967380	70.718	4	gain	TWH	chr12	9158392	17707943	8550	DUP/DEL
chr12	15898155	15968650	70.495	5	gain	ARB	chr12	9158392	17707943	8550	DUP/DEL
chr12	15914160	16055334	141.174	3	gain	CH	chr12	9158392	17707943	8550	DUP/DEL
chr12	16008322	16056708	48.386	4	gain	TWH	chr12	9158392	17707943	8550	DUP/DEL
chr12	16011560	16054470	42.91	4	gain	ARB	chr12	9158392	17707943	8550	DUP/DEL
chr12	16053828	16193240	139.412	1	loss	PER	chr12	9158392	17707943	8550	DUP/DEL
chr12	16055334	17201838	1146.5	1	loss	CH	chr12	9158392	17707943	8550	DUP/DEL
chr12	16193240	16198602	5.362	5	gain	PER	chr12	9158392	17707943	8550	DUP/DEL
chr12	16198144	16265140	66.996	0	loss	TWH	chr12	9158392	17707943	8550	DUP/DEL
chr12	16198525	16655210	456.685	0	loss	ARB	chr12	9158392	17707943	8550	DUP/DEL
chr12	16198602	16525684	327.082	0	loss	PER	chr12	9158392	17707943	8550	DUP/DEL
chr12	16264182	16299810	35.628	7	gain	MM	chr12	9158392	17707943	8550	DUP/DEL
chr12	16265140	16276306	11.166	6	gain	TWH	chr12	9158392	17707943	8550	DUP/DEL
chr12	16276306	17203084	926.778	1	loss	TWH	chr12	9158392	17707943	8550	DUP/DEL
chr12	16299810	16359190	59.38	1	loss	MM	chr12	9158392	17707943	8550	DUP/DEL
chr12	16359190	16572958	213.768	3	gain	MM	chr12	9158392	17707943	8550	DUP/DEL
chr12	16525684	16531046	5.362	5	gain	PER	chr12	9158392	17707943	8550	DUP/DEL
chr12	16531046	16635605	104.559	0	loss	PER	chr12	9158392	17707943	8550	DUP/DEL
chr12	16569477	16887773	318.296	1	loss	AMH	chr12	9158392	17707943	8550	DUP/DEL
chr12	16572958	16887672	314.714	1	loss	MM	chr12	9158392	17707943	8550	DUP/DEL
chr12	16655210	16753290	98.08	4	gain	ARB	chr12	9158392	17707943	8550	DUP/DEL
chr12	16753290	17154805	401.515	0	loss	ARB	chr12	9158392	17707943	8550	DUP/DEL
chr12	16756250	16887619	131.369	0	loss	PER	chr12	9158392	17707943	8550	DUP/DEL
chr12	16887619	17158400	270.781	1	loss	PER	chr12	9158392	17707943	8550	DUP/DEL
chr12	16887672	17030184	142.512	3	gain	MM	chr12	9158392	17707943	8550	DUP/DEL
chr12	17154882	17321146	166.264	4	gain	MM	chr12	9158392	17707943	8550	DUP/DEL
chr12	17155431	17224154	68.723	5	gain	AMH	chr12	9158392	17707943	8550	DUP/DEL
chr12	17158400	17203977	45.577	3	gain	PER	chr12	9158392	17707943	8550	DUP/DEL
chr12	17201838	17223228	21.39	8	gain	CH	chr12	9158392	17707943	8550	DUP/DEL
chr12	17203084	17221694	18.61	7	gain	TWH	chr12	9158392	17707943	8550	DUP/DEL
chr12	17203845	17225300	21.455	9	gain	ARB	chr12	9158392	17707943	8550	DUP/DEL
chr12	17203977	17222744	18.767	15	gain	PER	chr12	9158392	17707943	8550	DUP/DEL
chr12	17222744	17305855	83.111	4	gain	PER	chr12	9158392	17707943	8550	DUP/DEL
chr12	17224154	17325430	101.276	3	gain	AMH	chr12	9158392	17707943	8550	DUP/DEL
chr12	17321146	17422092	100.946	5	gain	MM	chr12	9158392	17707943	8550	DUP/DEL
chr12	17323380	17421460	98.08	4	gain	ARB	chr12	9158392	17707943	8550	DUP/DEL
chr12	17324622	17421138	96.516	7	gain	PER	chr12	9158392	17707943	8550	DUP/DEL
chr12	17325430	17419472	94.042	4	gain	AMH	chr12	9158392	17707943	8550	DUP/DEL
chr12	17325900	17338734	12.834	8	gain	CH	chr12	9158392	17707943	8550	DUP/DEL
chr12	17325910	17337076	11.166	7	gain	TWH	chr12	9158392	17707943	8550	DUP/DEL
chr12	17337076	17422682	85.606	3	gain	TWH	chr12	9158392	17707943	8550	DUP/DEL
chr12	17659612	17707116	47.504	6	gain	MM	chr12	9158392	17707943	8550	DUP/DEL
chr12	20569232	20741434	172.202	5	gain	MM	chr12	20518707	33091231	12573	DUP/DEL
chr12	20708044	20734854	26.81	4	gain	PER	chr12	20518707	33091231	12573	DUP/DEL
chr12	20709798	20731188	21.39	6	gain	CH	chr12	20518707	33091231	12573	DUP/DEL
chr12	20925084	21055354	130.27	4	gain	TWH	chr12	20518707	33091231	12573	DUP/DEL
chr12	20990830	21068024	77.194	4	gain	MM	chr12	20518707	33091231	12573	DUP/DEL
chr12	21000273	21016359	16.086	7	gain	PER	chr12	20518707	33091231	12573	DUP/DEL
chr12	21000302	21018387	18.085	6	gain	AMH	chr12	20518707	33091231	12573	DUP/DEL
chr12	21000702	21017814	17.112	6	gain	CH	chr12	20518707	33091231	12573	DUP/DEL
chr12	22953574	22968462	14.888	5	gain	TWH	chr12	20518707	33091231	12573	DUP/DEL
chr12	22993269	23036673	43.404	34	gain	AMH	chr12	20518707	33091231	12573	DUP/DEL
chr12	22997874	23039440	41.566	22	gain	MM	chr12	20518707	33091231	12573	DUP/DEL
chr12	22998528	23037030	38.502	17	gain	CH	chr12	20518707	33091231	12573	DUP/DEL
chr12	22999760	23036540	36.78	17	gain	ARB	chr12	20518707	33091231	12573	DUP/DEL
chr12	23000299	23035152	34.853	20	gain	PER	chr12	20518707	33091231	12573	DUP/DEL
chr12	23001960	23035458	33.498	21	gain	TWH	chr12	20518707	33091231	12573	DUP/DEL
chr12	26266920	26284032	17.112	7	gain	CH	chr12	20518707	33091231	12573	DUP/DEL
chr12	26268438	26284524	16.086	6	gain	PER	chr12	20518707	33091231	12573	DUP/DEL
chr12	26269876	26284764	14.888	5	gain	TWH	chr12	20518707	33091231	12573	DUP/DEL
chr12	26270115	26282375	12.26	6	gain	ARB	chr12	20518707	33091231	12573	DUP/DEL
chr12	28196298	28418754	222.456	1	loss	CH	chr12	20518707	33091231	12573	DUP/DEL
chr12	28199562	28419268	219.706	1	loss	MM	chr12	20518707	33091231	12573	DUP/DEL
chr12	28201065	28418680	217.615	1	loss	ARB	chr12	20518707	33091231	12573	DUP/DEL
chr12	28201439	28418600	217.161	1	loss	PER	chr12	20518707	33091231	12573	DUP/DEL
chr12	28201594	28417470	215.876	1	loss	TWH	chr12	20518707	33091231	12573	DUP/DEL
chr12	28201749	28418769	217.02	1	loss	AMH	chr12	20518707	33091231	12573	DUP/DEL
chr12	32907466	32997891	90.425	43	gain	AMH	chr12	20518707	33091231	12573	DUP/DEL
chr12	32908396	32997466	89.07	23	gain	MM	chr12	20518707	33091231	12573	DUP/DEL
chr12	32908905	32997790	88.885	25	gain	ARB	chr12	20518707	33091231	12573	DUP/DEL
chr12	32909275	32995067	85.792	26	gain	PER	chr12	20518707	33091231	12573	DUP/DEL
chr12	32909924	32995530	85.606	26	gain	TWH	chr12	20518707	33091231	12573	DUP/DEL
chr12	32910654	32996214	85.56	28	gain	CH	chr12	20518707	33091231	12573	DUP/DEL
chr12	32995067	33005791	10.724	4	gain	PER	chr12	20518707	33091231	12573	DUP/DEL
chr12	33005791	33043325	37.534	1	loss	PER	chr12	20518707	33091231	12573	DUP/DEL
chr12	33039032	33062784	23.752	12	gain	MM	chr12	20518707	33091231	12573	DUP/DEL
chr12	33040194	33062526	22.332	13	gain	TWH	chr12	20518707	33091231	12573	DUP/DEL
chr12	33040700	33062155	21.455	12	gain	ARB	chr12	20518707	33091231	12573	DUP/DEL
chr12	33041295	33062997	21.702	26	gain	AMH	chr12	20518707	33091231	12573	DUP/DEL
chr12	33043272	33060384	17.112	24	gain	CH	chr12	20518707	33091231	12573	DUP/DEL
chr12	33043325	33062092	18.767	14	gain	PER	chr12	20518707	33091231	12573	DUP/DEL
chr13	2716367	2889983	173.616	1	loss	AMH	chr13	2085373	3092929	1008	DUP/DEL
chr13	2716530	2887650	171.12	1	loss	CH	chr13	2085373	3092929	1008	DUP/DEL
chr13	2717060	2888272	171.212	1	loss	TWH	chr13	2085373	3092929	1008	DUP/DEL
chr13	2718534	2887437	168.903	1	loss	PER	chr13	2085373	3092929	1008	DUP/DEL
chr13	2718655	2890295	171.64	1	loss	ARB	chr13	2085373	3092929	1008	DUP/DEL
chr13	2719604	2891806	172.202	1	loss	MM	chr13	2085373	3092929	1008	DUP/DEL
chr13	6720386	6724003	3.617	4	gain	AMH	chr13	4210059	6734639	2525	DUP/DEL
chr13	7699280	7702345	3.065	8	gain	ARB	chr13	7698206	9654170	1956	DUP/DEL
chr13	7699832	7702513	2.681	7	gain	PER	chr13	7698206	9654170	1956	DUP/DEL
chr13	7711444	7715061	3.617	10	gain	AMH	chr13	7698206	9654170	1956	DUP/DEL
chr13	7711540	7714605	3.065	9	gain	ARB	chr13	7698206	9654170	1956	DUP/DEL
chr13	7711984	7715706	3.722	11	gain	TWH	chr13	7698206	9654170	1956	DUP/DEL
chr13	7713237	7715918	2.681	11	gain	PER	chr13	7698206	9654170	1956	DUP/DEL
chr13	7751231	7758465	7.234	5	gain	AMH	chr13	7698206	9654170	1956	DUP/DEL
chr13	7751385	7757515	6.13	4	gain	ARB	chr13	7698206	9654170	1956	DUP/DEL
chr13	7752926	7756648	3.722	9	gain	TWH	chr13	7698206	9654170	1956	DUP/DEL
chr13	7753452	7756133	2.681	8	gain	PER	chr13	7698206	9654170	1956	DUP/DEL
chr13	7833018	7858686	25.668	8	gain	CH	chr13	7698206	9654170	1956	DUP/DEL
chr13	7834810	7857142	22.332	8	gain	TWH	chr13	7698206	9654170	1956	DUP/DEL
chr13	7836563	7858011	21.448	10	gain	PER	chr13	7698206	9654170	1956	DUP/DEL
chr13	7837205	7855595	18.39	10	gain	ARB	chr13	7698206	9654170	1956	DUP/DEL
chr13	7838039	7852507	14.468	15	gain	AMH	chr13	7698206	9654170	1956	DUP/DEL
chr13	7838160	7861912	23.752	8	gain	MM	chr13	7698206	9654170	1956	DUP/DEL
chr13	7852507	7859741	7.234	4	gain	AMH	chr13	7698206	9654170	1956	DUP/DEL
chr13	7855595	7861725	6.13	4	gain	ARB	chr13	7698206	9654170	1956	DUP/DEL
chr13	8283510	8336952	53.442	1	loss	MM	chr13	7698206	9654170	1956	DUP/DEL
chr13	8284290	8340591	56.301	1	loss	PER	chr13	7698206	9654170	1956	DUP/DEL
chr13	8284695	8336800	52.105	1	loss	ARB	chr13	7698206	9654170	1956	DUP/DEL
chr13	8285172	8519658	234.486	1	loss	TWH	chr13	7698206	9654170	1956	DUP/DEL
chr13	8286547	8521652	235.105	1	loss	AMH	chr13	7698206	9654170	1956	DUP/DEL
chr13	8459400	8520700	61.3	1	loss	ARB	chr13	7698206	9654170	1956	DUP/DEL
chr13	8461236	8520218	58.982	1	loss	PER	chr13	7698206	9654170	1956	DUP/DEL
chr13	8461650	8521030	59.38	1	loss	MM	chr13	7698206	9654170	1956	DUP/DEL
chr13	9158220	9164350	6.13	5	gain	ARB	chr13	7698206	9654170	1956	DUP/DEL
chr13	9158244	9161861	3.617	4	gain	AMH	chr13	7698206	9654170	1956	DUP/DEL
chr13	9159198	9163476	4.278	6	gain	CH	chr13	7698206	9654170	1956	DUP/DEL
chr13	9159842	9163564	3.722	6	gain	TWH	chr13	7698206	9654170	1956	DUP/DEL
chr13	9160977	9163658	2.681	6	gain	PER	chr13	7698206	9654170	1956	DUP/DEL
chr13	9286950	9290015	3.065	5	gain	ARB	chr13	7698206	9654170	1956	DUP/DEL
chr13	9286984	9289665	2.681	7	gain	PER	chr13	7698206	9654170	1956	DUP/DEL
chr13	9542366	9548304	5.938	6	gain	MM	chr13	7698206	9654170	1956	DUP/DEL
chr13	12605245	12612479	7.234	4	gain	AMH	chr13	12455709	13223512	768	DUP
chr13	12793329	12887371	94.042	3	gain	AMH	chr13	12455709	13223512	768	DUP
chr13	12796236	12956282	160.046	3	gain	TWH	chr13	12455709	13223512	768	DUP
chr13	12796375	12888325	91.95	3	gain	ARB	chr13	12455709	13223512	768	DUP
chr13	12796413	12903653	107.24	3	gain	PER	chr13	12455709	13223512	768	DUP
chr13	12799776	12885336	85.56	3	gain	CH	chr13	12455709	13223512	768	DUP
chr13	18508189	18515423	7.234	4	gain	AMH	chr13	18448381	22757689	4309	DUP/DEL
chr13	18508746	18514684	5.938	5	gain	MM	chr13	18448381	22757689	4309	DUP/DEL
chr13	18509506	18516950	7.444	5	gain	TWH	chr13	18448381	22757689	4309	DUP/DEL
chr13	18509535	18515665	6.13	5	gain	ARB	chr13	18448381	22757689	4309	DUP/DEL
chr13	18509624	18514986	5.362	5	gain	PER	chr13	18448381	22757689	4309	DUP/DEL
chr13	18510906	18515184	4.278	7	gain	CH	chr13	18448381	22757689	4309	DUP/DEL
chr13	22086390	22101715	15.325	1	loss	ARB	chr13	18448381	22757689	4309	DUP/DEL
chr13	23658735	23698580	39.845	5	gain	ARB	chr13	23655137	23828267	173	DUP
chr13	23704710	23716970	12.26	4	gain	ARB	chr13	23655137	23828267	173	DUP
chr13	23722310	23817318	95.008	9	gain	MM	chr13	23655137	23828267	173	DUP
chr13	23735360	23769075	33.715	9	gain	ARB	chr13	23655137	23828267	173	DUP
chr13	23769075	23784400	15.325	4	gain	ARB	chr13	23655137	23828267	173	DUP
chr13	23772414	23828244	55.83	6	gain	TWH	chr13	23655137	23828267	173	DUP
chr13	23784400	23827310	42.91	8	gain	ARB	chr13	23655137	23828267	173	DUP
chr13	25696688	25700410	3.722	5	gain	TWH	chr13	25608269	25755093	147	DUP
chr13	25696960	25700025	3.065	6	gain	ARB	chr13	25608269	25755093	147	DUP
chr13	25697946	25702224	4.278	6	gain	CH	chr13	25608269	25755093	147	DUP
chr13	27879240	27888435	9.195	4	gain	ARB	chr13	27167129	28091638	925	DUP
chr13	27879719	27914572	34.853	3	gain	PER	chr13	27167129	28091638	925	DUP
chr13	27879836	27890687	10.851	4	gain	AMH	chr13	27167129	28091638	925	DUP
chr13	27912389	27934091	21.702	6	gain	AMH	chr13	27167129	28091638	925	DUP
chr13	27912955	27934410	21.455	6	gain	ARB	chr13	27167129	28091638	925	DUP
chr13	27913950	27935340	21.39	5	gain	CH	chr13	27167129	28091638	925	DUP
chr13	27914538	27932352	17.814	6	gain	MM	chr13	27167129	28091638	925	DUP
chr13	27914572	27933339	18.767	6	gain	PER	chr13	27167129	28091638	925	DUP
chr13	27915000	27933610	18.61	6	gain	TWH	chr13	27167129	28091638	925	DUP
chr13	27932352	27979856	47.504	3	gain	MM	chr13	27167129	28091638	925	DUP
chr13	27934410	27977320	42.91	3	gain	ARB	chr13	27167129	28091638	925	DUP
chr13	27977495	28020899	43.404	1	loss	AMH	chr13	27167129	28091638	925	DUP
chr13	27978916	28021812	42.896	1	loss	PER	chr13	27167129	28091638	925	DUP
chr13	27979856	28021422	41.566	1	loss	MM	chr13	27167129	28091638	925	DUP
chr13	28019216	28026660	7.444	4	gain	TWH	chr13	27167129	28091638	925	DUP
chr13	28020230	28029425	9.195	4	gain	ARB	chr13	27167129	28091638	925	DUP
chr13	28020899	28028133	7.234	4	gain	AMH	chr13	27167129	28091638	925	DUP
chr13	28021422	28027360	5.938	4	gain	MM	chr13	27167129	28091638	925	DUP
chr13	28021812	28027174	5.362	5	gain	PER	chr13	27167129	28091638	925	DUP
chr13	28696620	28793392	96.772	1	loss	TWH	chr13	28604740	28953464	349	DUP
chr13	28696824	28795218	98.394	1	loss	CH	chr13	28604740	28953464	349	DUP
chr13	28697278	28791320	94.042	1	loss	AMH	chr13	28604740	28953464	349	DUP
chr13	28697424	28793940	96.516	1	loss	PER	chr13	28604740	28953464	349	DUP
chr13	28697595	28792610	95.015	1	loss	ARB	chr13	28604740	28953464	349	DUP
chr13	28698354	28793362	95.008	1	loss	MM	chr13	28604740	28953464	349	DUP
chr13	32240735	32256060	15.325	1	loss	ARB	chr13	31731638	32472982	741	DUP
chr13	32241706	32257792	16.086	1	loss	PER	chr13	31731638	32472982	741	DUP
chr13	32241938	32256406	14.468	1	loss	AMH	chr13	31731638	32472982	741	DUP
chr13	33056106	33205836	149.73	1	loss	CH	chr13	32857842	33749985	892	DUP/DEL
chr13	33056846	33205296	148.45	1	loss	MM	chr13	32857842	33749985	892	DUP/DEL
chr13	33058804	33207684	148.88	1	loss	TWH	chr13	32857842	33749985	892	DUP/DEL
chr13	33059090	33206210	147.12	1	loss	ARB	chr13	32857842	33749985	892	DUP/DEL
chr13	33059380	33207677	148.297	1	loss	AMH	chr13	32857842	33749985	892	DUP/DEL
chr13	33059411	33206866	147.455	1	loss	PER	chr13	32857842	33749985	892	DUP/DEL
chr13	35806140	35930838	124.698	1	loss	MM	chr13	33938233	42578167	8640	DUP/DEL
chr13	35807436	35933443	126.007	1	loss	PER	chr13	33938233	42578167	8640	DUP/DEL
chr13	35808300	35934895	126.595	1	loss	AMH	chr13	33938233	42578167	8640	DUP/DEL
chr13	35808395	35934060	125.665	1	loss	ARB	chr13	33938233	42578167	8640	DUP/DEL
chr13	35809362	35932188	122.826	1	loss	TWH	chr13	33938233	42578167	8640	DUP/DEL
chr13	40724655	40730785	6.13	4	gain	ARB	chr13	33938233	42578167	8640	DUP/DEL
chr13	40726560	40730838	4.278	6	gain	CH	chr13	33938233	42578167	8640	DUP/DEL
chr13	40789020	40810475	21.455	0	loss	ARB	chr13	33938233	42578167	8640	DUP/DEL
chr13	40789398	40808008	18.61	0	loss	TWH	chr13	33938233	42578167	8640	DUP/DEL
chr13	41085503	41110822	25.319	0	loss	AMH	chr13	33938233	42578167	8640	DUP/DEL
chr13	41110822	41114439	3.617	7	gain	AMH	chr13	33938233	42578167	8640	DUP/DEL
chr13	41113135	41115816	2.681	8	gain	PER	chr13	33938233	42578167	8640	DUP/DEL
chr13	41276355	41303940	27.585	0	loss	ARB	chr13	33938233	42578167	8640	DUP/DEL
chr13	41276980	41306756	29.776	0	loss	TWH	chr13	33938233	42578167	8640	DUP/DEL
chr13	41277204	41306140	28.936	0	loss	AMH	chr13	33938233	42578167	8640	DUP/DEL
chr14	7444	115382	107.938	5	gain	TWH	chr14	0	1004187	1004	DUP
chr14	9195	116470	107.275	7	gain	ARB	chr14	0	1004187	1004	DUP
chr14	64170	94116	29.946	3	gain	CH	chr14	0	1004187	1004	DUP
chr14	65318	83132	17.814	3	gain	MM	chr14	0	1004187	1004	DUP
chr14	67025	91154	24.129	3	gain	PER	chr14	0	1004187	1004	DUP
chr14	83132	95008	11.876	4	gain	MM	chr14	0	1004187	1004	DUP
chr14	91154	115283	24.129	5	gain	PER	chr14	0	1004187	1004	DUP
chr14	94042	115744	21.702	9	gain	AMH	chr14	0	1004187	1004	DUP
chr14	94116	115506	21.39	11	gain	CH	chr14	0	1004187	1004	DUP
chr14	95008	118760	23.752	9	gain	MM	chr14	0	1004187	1004	DUP
chr14	115506	278070	162.564	3	gain	CH	chr14	0	1004187	1004	DUP
chr14	196160	226810	30.65	3	gain	ARB	chr14	0	1004187	1004	DUP
chr14	3092535	3135939	43.404	3	gain	AMH	chr14	3001214	3279337	278	DUP
chr14	3093698	3141202	47.504	3	gain	MM	chr14	3001214	3279337	278	DUP
chr14	3093874	3136770	42.896	3	gain	PER	chr14	3001214	3279337	278	DUP
chr14	5946420	5954976	8.556	57	gain	CH	chr14	5235988	6269001	1033	DUP/DEL
chr14	5947756	5951478	3.722	98	gain	TWH	chr14	5235988	6269001	1033	DUP/DEL
chr14	5949139	5951820	2.681	151	gain	PER	chr14	5235988	6269001	1033	DUP/DEL
chr14	5949165	5952230	3.065	97	gain	ARB	chr14	5235988	6269001	1033	DUP/DEL
chr14	5949876	5955814	5.938	45	gain	MM	chr14	5235988	6269001	1033	DUP/DEL
chr14	5949965	5953582	3.617	103	gain	AMH	chr14	5235988	6269001	1033	DUP/DEL
chr14	8675418	8681356	5.938	6	gain	MM	chr14	7327646	9287322	1960	DUP/DEL
chr14	8675784	8680062	4.278	4	gain	CH	chr14	7327646	9287322	1960	DUP/DEL
chr14	8675982	8679704	3.722	5	gain	TWH	chr14	7327646	9287322	1960	DUP/DEL
chr14	28755830	28814065	58.235	3	gain	ARB	chr14	27375866	28889573	1514	DUP/DEL
chr14	28756406	28815388	58.982	3	gain	PER	chr14	27375866	28889573	1514	DUP/DEL
chr14	28782226	28804558	22.332	3	gain	TWH	chr14	27375866	28889573	1514	DUP/DEL
chr14	41061270	41073146	11.876	3	gain	MM	chr14	36762286	42489151	5727	DUP/DEL
chr14	41063801	41067418	3.617	4	gain	AMH	chr14	36762286	42489151	5727	DUP/DEL
chr14	41064522	41068800	4.278	5	gain	CH	chr14	36762286	42489151	5727	DUP/DEL
chr14	41064870	41071000	6.13	4	gain	ARB	chr14	36762286	42489151	5727	DUP/DEL
chr14	93363144	93365825	2.681	5	gain	PER	chr14	93238550	93904894	666	DUP/DEL
chr14	93410130	93431520	21.39	3	gain	CH	chr14	93238550	93904894	666	DUP/DEL
chr14	93421200	93433460	12.26	8	gain	ARB	chr14	93238550	93904894	666	DUP/DEL
chr14	93422126	93435531	13.405	6	gain	PER	chr14	93238550	93904894	666	DUP/DEL
chr14	93422554	93434430	11.876	4	gain	MM	chr14	93238550	93904894	666	DUP/DEL
chr14	93423493	93434344	10.851	4	gain	AMH	chr14	93238550	93904894	666	DUP/DEL
chr14	93623490	93648010	24.52	3	gain	ARB	chr14	93238550	93904894	666	DUP/DEL
chr15	0	101145	101.145	3	gain	ARB	chr15	0	194508	195	DUP
chr15	3617	39787	36.17	3	gain	AMH	chr15	0	194508	195	DUP
chr15	39787	112127	72.34	4	gain	AMH	chr15	0	194508	195	DUP
chr15	11873180	11876902	3.722	5	gain	TWH	chr15	11493933	12786157	1292	DUP/DEL
chr15	11873810	11876875	3.065	5	gain	ARB	chr15	11493933	12786157	1292	DUP/DEL
chr15	12941394	13027000	85.606	1	loss	TWH	chr15	12916075	13591379	675	DUP
chr15	12944840	13027972	83.132	1	loss	MM	chr15	12916075	13591379	675	DUP
chr15	29865569	29869186	3.617	4	gain	AMH	chr15	29842823	30082596	240	DUP/DEL
chr15	29866340	29869021	2.681	4	gain	PER	chr15	29842823	30082596	240	DUP/DEL
chr16	3065	30650	27.585	22	gain	ARB	chr16	0	8185790	8186	DUP/DEL
chr16	10724	32172	21.448	17	gain	PER	chr16	0	8185790	8186	DUP/DEL
chr16	1412887	1439697	26.81	1	loss	PER	chr16	0	8185790	8186	DUP/DEL
chr16	1414247	1439566	25.319	1	loss	AMH	chr16	0	8185790	8186	DUP/DEL
chr16	1416018	1437408	21.39	1	loss	CH	chr16	0	8185790	8186	DUP/DEL
chr16	1418082	1436692	18.61	1	loss	TWH	chr16	0	8185790	8186	DUP/DEL
chr16	1419182	1442934	23.752	1	loss	MM	chr16	0	8185790	8186	DUP/DEL
chr16	3562800	3568738	5.938	4	gain	MM	chr16	0	8185790	8186	DUP/DEL
chr16	3564595	3570725	6.13	5	gain	ARB	chr16	0	8185790	8186	DUP/DEL
chr16	3565676	3569398	3.722	7	gain	TWH	chr16	0	8185790	8186	DUP/DEL
chr16	3565730	3568411	2.681	5	gain	PER	chr16	0	8185790	8186	DUP/DEL
chr16	3566362	3569979	3.617	5	gain	AMH	chr16	0	8185790	8186	DUP/DEL
chr16	4200996	4260888	59.892	1	loss	CH	chr16	0	8185790	8186	DUP/DEL
chr16	4202138	4261690	59.552	3	gain	TWH	chr16	0	8185790	8186	DUP/DEL
chr16	4203808	4262790	58.982	1	loss	PER	chr16	0	8185790	8186	DUP/DEL
chr16	4210042	4263484	53.442	1	loss	MM	chr16	0	8185790	8186	DUP/DEL
chr16	4261690	4302632	40.942	6	gain	TWH	chr16	0	8185790	8186	DUP/DEL
chr16	4262790	4305686	42.896	3	gain	PER	chr16	0	8185790	8186	DUP/DEL
chr16	4263415	4303260	39.845	5	gain	ARB	chr16	0	8185790	8186	DUP/DEL
chr16	4263484	4305050	41.566	3	gain	MM	chr16	0	8185790	8186	DUP/DEL
chr16	4264443	4304230	39.787	4	gain	AMH	chr16	0	8185790	8186	DUP/DEL
chr16	4302632	4306354	3.722	4	gain	TWH	chr16	0	8185790	8186	DUP/DEL
chr16	4303260	4306325	3.065	4	gain	ARB	chr16	0	8185790	8186	DUP/DEL
chr16	6009256	6015194	5.938	3	gain	MM	chr16	0	8185790	8186	DUP/DEL
chr16	6010465	6013530	3.065	4	gain	ARB	chr16	0	8185790	8186	DUP/DEL
chr16	6010590	6014868	4.278	5	gain	CH	chr16	0	8185790	8186	DUP/DEL
chr16	6010802	6013483	2.681	4	gain	PER	chr16	0	8185790	8186	DUP/DEL
chr16	6011454	6015071	3.617	4	gain	AMH	chr16	0	8185790	8186	DUP/DEL
chr16	40313945	40338465	24.52	1	loss	ARB	chr16	39814076	41076593	1263	DUP
chr16	40314197	40338326	24.129	1	loss	PER	chr16	39814076	41076593	1263	DUP
chr16	40316704	40339036	22.332	1	loss	TWH	chr16	39814076	41076593	1263	DUP
chr16	40936572	40948448	11.876	3	gain	MM	chr16	39814076	41076593	1263	DUP
chr16	40939205	40948400	9.195	3	gain	ARB	chr16	39814076	41076593	1263	DUP
chr16	40940823	40948057	7.234	3	gain	AMH	chr16	39814076	41076593	1263	DUP
chr16	70697828	70703766	5.938	3	gain	MM	chr16	70048161	71036669	989	DUP
chr16	70699390	70703112	3.722	4	gain	TWH	chr16	70048161	71036669	989	DUP
chr16	70700355	70703420	3.065	5	gain	ARB	chr16	70048161	71036669	989	DUP
chr16	74286405	74372225	85.82	1	loss	ARB	chr16	73926553	74402160	476	DUP
chr16	74287398	74373004	85.606	1	loss	TWH	chr16	73926553	74402160	476	DUP
chr16	74287470	74373030	85.56	1	loss	CH	chr16	73926553	74402160	476	DUP
chr16	74287829	74370940	83.111	1	loss	PER	chr16	73926553	74402160	476	DUP
chr16	74289563	74372754	83.191	1	loss	AMH	chr16	73926553	74402160	476	DUP
chr16	74290318	74373450	83.132	1	loss	MM	chr16	73926553	74402160	476	DUP
chr17	18942220	18954096	11.876	4	gain	MM	chr17	18764195	19070755	307	DUP
chr17	18942984	18964374	21.39	6	gain	CH	chr17	18764195	19070755	307	DUP
chr17	18943946	18946627	2.681	4	gain	PER	chr17	18764195	19070755	307	DUP
chr17	18944765	18966220	21.455	6	gain	ARB	chr17	18764195	19070755	307	DUP
chr17	18944980	18952424	7.444	5	gain	TWH	chr17	18764195	19070755	307	DUP
chr17	18945846	18953080	7.234	3	gain	AMH	chr17	18764195	19070755	307	DUP
chr17	18946627	18965394	18.767	8	gain	PER	chr17	18764195	19070755	307	DUP
chr17	18952424	18963590	11.166	9	gain	TWH	chr17	18764195	19070755	307	DUP
chr17	18953080	18963931	10.851	7	gain	AMH	chr17	18764195	19070755	307	DUP
chr17	18954096	18965972	11.876	10	gain	MM	chr17	18764195	19070755	307	DUP
chr17	18963590	18967312	3.722	4	gain	TWH	chr17	18764195	19070755	307	DUP
chr17	18963931	18967548	3.617	4	gain	AMH	chr17	18764195	19070755	307	DUP
chr17	21602120	21608250	6.13	3	gain	ARB	chr17	21502222	22553171	1051	DEL
chr17	21603900	21608178	4.278	4	gain	CH	chr17	21502222	22553171	1051	DEL
chr17	44238100	44249976	11.876	4	gain	MM	chr17	43185376	45509144	2324	DUP/DEL
chr17	44239527	44246761	7.234	4	gain	AMH	chr17	43185376	45509144	2324	DUP/DEL
chr17	44240210	44246340	6.13	6	gain	ARB	chr17	43185376	45509144	2324	DUP/DEL
chr17	44241862	44247224	5.362	5	gain	PER	chr17	43185376	45509144	2324	DUP/DEL
chr17	44243076	44247354	4.278	6	gain	CH	chr17	43185376	45509144	2324	DUP/DEL
chr17	44243414	44247136	3.722	5	gain	TWH	chr17	43185376	45509144	2324	DUP/DEL
chr17	44246340	44249405	3.065	4	gain	ARB	chr17	43185376	45509144	2324	DUP/DEL
chr17	45359634	45363912	4.278	91	gain	CH	chr17	43185376	45509144	2324	DUP/DEL
chr17	45359839	45365201	5.362	68	gain	PER	chr17	43185376	45509144	2324	DUP/DEL
chr17	45360014	45363736	3.722	61	gain	TWH	chr17	43185376	45509144	2324	DUP/DEL
chr17	45360382	45366320	5.938	29	gain	MM	chr17	43185376	45509144	2324	DUP/DEL
chr17	45360797	45364414	3.617	105	gain	AMH	chr17	43185376	45509144	2324	DUP/DEL
chr17	45362000	45365065	3.065	85	gain	ARB	chr17	43185376	45509144	2324	DUP/DEL
chr17	56687778	56696334	8.556	4	gain	CH	chr17	56420015	57862950	1443	DEL
chr17	56689241	56696475	7.234	3	gain	AMH	chr17	56420015	57862950	1443	DEL
chr17	56689782	56697226	7.444	4	gain	TWH	chr17	56420015	57862950	1443	DEL
chr17	56690086	56696024	5.938	4	gain	MM	chr17	56420015	57862950	1443	DEL
chr17	56690240	56693305	3.065	5	gain	ARB	chr17	56420015	57862950	1443	DEL
chr17	57083494	57090728	7.234	3	gain	AMH	chr17	56420015	57862950	1443	DEL
chr17	57085625	57088690	3.065	5	gain	ARB	chr17	56420015	57862950	1443	DEL
chr17	57085632	57089910	4.278	5	gain	CH	chr17	56420015	57862950	1443	DEL
chr17	68994275	68997892	3.617	3	gain	AMH	chr17	68958862	69009357	50	DEL
chr17	80269884	80281760	11.876	1	loss	MM	chr17	79529796	80757907	1228	DUP/DEL
chr17	80271821	80282545	10.724	0	loss	PER	chr17	79529796	80757907	1228	DUP/DEL
chr17	80272081	80282932	10.851	0	loss	AMH	chr17	79529796	80757907	1228	DUP/DEL
chr17	80272350	80281545	9.195	0	loss	ARB	chr17	79529796	80757907	1228	DUP/DEL
chr17	80272374	80283540	11.166	0	loss	TWH	chr17	79529796	80757907	1228	DUP/DEL
chr17	80272392	80280948	8.556	0	loss	CH	chr17	79529796	80757907	1228	DUP/DEL
chr18	126548	137714	11.166	4	gain	TWH	chr18	0	268213	268	DUP
chr18	128688	136731	8.043	4	gain	PER	chr18	0	268213	268	DUP
chr18	128730	137925	9.195	4	gain	ARB	chr18	0	268213	268	DUP
chr18	130212	137446	7.234	4	gain	AMH	chr18	0	268213	268	DUP
chr18	3275360	3293970	18.61	9	gain	TWH	chr18	3073425	3937202	864	DUP/DEL
chr18	3276182	3289587	13.405	4	gain	PER	chr18	3073425	3937202	864	DUP/DEL
chr18	3276485	3291810	15.325	7	gain	ARB	chr18	3073425	3937202	864	DUP/DEL
chr18	3280619	3291470	10.851	5	gain	AMH	chr18	3073425	3937202	864	DUP/DEL
chr18	3331257	3334874	3.617	3	gain	AMH	chr18	3073425	3937202	864	DUP/DEL
chr18	3334874	3399980	65.106	6	gain	AMH	chr18	3073425	3937202	864	DUP/DEL
chr18	3337156	3402474	65.318	3	gain	MM	chr18	3073425	3937202	864	DUP/DEL
chr18	3398186	3413074	14.888	14	gain	TWH	chr18	3073425	3937202	864	DUP/DEL
chr18	3399085	3411345	12.26	13	gain	ARB	chr18	3073425	3937202	864	DUP/DEL
chr18	3399508	3412913	13.405	7	gain	PER	chr18	3073425	3937202	864	DUP/DEL
chr18	3399980	3410831	10.851	12	gain	AMH	chr18	3073425	3937202	864	DUP/DEL
chr18	3401010	3409566	8.556	10	gain	CH	chr18	3073425	3937202	864	DUP/DEL
chr18	3402474	3408412	5.938	9	gain	MM	chr18	3073425	3937202	864	DUP/DEL
chr18	3408412	3420288	11.876	5	gain	MM	chr18	3073425	3937202	864	DUP/DEL
chr18	3409566	3422400	12.834	6	gain	CH	chr18	3073425	3937202	864	DUP/DEL
chr18	3410831	3414448	3.617	4	gain	AMH	chr18	3073425	3937202	864	DUP/DEL
chr18	3411345	3426670	15.325	6	gain	ARB	chr18	3073425	3937202	864	DUP/DEL
chr18	3412913	3420956	8.043	3	gain	PER	chr18	3073425	3937202	864	DUP/DEL
chr18	3413074	3416796	3.722	4	gain	TWH	chr18	3073425	3937202	864	DUP/DEL
chr18	3414448	3425299	10.851	8	gain	AMH	chr18	3073425	3937202	864	DUP/DEL
chr18	3416796	3427962	11.166	5	gain	TWH	chr18	3073425	3937202	864	DUP/DEL
chr18	3420288	3426226	5.938	7	gain	MM	chr18	3073425	3937202	864	DUP/DEL
chr18	3420956	3426318	5.362	5	gain	PER	chr18	3073425	3937202	864	DUP/DEL
chr18	3888275	3899126	10.851	6	gain	AMH	chr18	3073425	3937202	864	DUP/DEL
chr18	3888702	3922926	34.224	5	gain	CH	chr18	3073425	3937202	864	DUP/DEL
chr18	3889390	3895328	5.938	6	gain	MM	chr18	3073425	3937202	864	DUP/DEL
chr18	3889485	3895615	6.13	11	gain	ARB	chr18	3073425	3937202	864	DUP/DEL
chr18	3889490	3896934	7.444	12	gain	TWH	chr18	3073425	3937202	864	DUP/DEL
chr18	3890131	3895493	5.362	7	gain	PER	chr18	3073425	3937202	864	DUP/DEL
chr18	3895328	3901266	5.938	4	gain	MM	chr18	3073425	3937202	864	DUP/DEL
chr18	3895493	3903536	8.043	3	gain	PER	chr18	3073425	3937202	864	DUP/DEL
chr18	3895615	3901745	6.13	5	gain	ARB	chr18	3073425	3937202	864	DUP/DEL
chr18	3896934	3900656	3.722	3	gain	TWH	chr18	3073425	3937202	864	DUP/DEL
chr18	3899126	3913594	14.468	3	gain	AMH	chr18	3073425	3937202	864	DUP/DEL
chr18	3900656	3919266	18.61	15	gain	TWH	chr18	3073425	3937202	864	DUP/DEL
chr18	3903536	3919622	16.086	7	gain	PER	chr18	3073425	3937202	864	DUP/DEL
chr18	3913142	3919080	5.938	5	gain	MM	chr18	3073425	3937202	864	DUP/DEL
chr18	3913594	3920828	7.234	6	gain	AMH	chr18	3073425	3937202	864	DUP/DEL
chr18	3919080	3925018	5.938	3	gain	MM	chr18	3073425	3937202	864	DUP/DEL
chr18	3919266	3922988	3.722	5	gain	TWH	chr18	3073425	3937202	864	DUP/DEL
chr18	8716860	8719925	3.065	4	gain	ARB	chr18	8685653	9156436	471	DUP/DEL
chr18	8977394	9009947	32.553	1	loss	AMH	chr18	8685653	9156436	471	DUP/DEL
chr18	8978669	9008160	29.491	1	loss	PER	chr18	8685653	9156436	471	DUP/DEL
chr18	9009947	9067819	57.872	3	gain	AMH	chr18	8685653	9156436	471	DUP/DEL
chr18	9067142	9080547	13.405	0	loss	PER	chr18	8685653	9156436	471	DUP/DEL
chr18	9729308	9848412	119.104	1	loss	TWH	chr18	9374866	10902962	1528	DUP/DEL
chr18	9729349	9801736	72.387	1	loss	PER	chr18	9374866	10902962	1528	DUP/DEL
chr18	9729730	9802070	72.34	1	loss	AMH	chr18	9374866	10902962	1528	DUP/DEL
chr18	9741006	9847956	106.95	1	loss	CH	chr18	9374866	10902962	1528	DUP/DEL
chr18	9771220	9850910	79.69	1	loss	ARB	chr18	9374866	10902962	1528	DUP/DEL
chr18	9791762	9851142	59.38	0	loss	MM	chr18	9374866	10902962	1528	DUP/DEL
chr18	9801736	9849994	48.258	0	loss	PER	chr18	9374866	10902962	1528	DUP/DEL
chr18	9802070	9849091	47.021	0	loss	AMH	chr18	9374866	10902962	1528	DUP/DEL
chr18	13021200	13136944	115.744	1	loss	AMH	chr18	12988557	13175298	187	DUP/DEL
chr18	13024298	13139581	115.283	1	loss	PER	chr18	12988557	13175298	187	DUP/DEL
chr18	13027972	13099228	71.256	1	loss	MM	chr18	12988557	13175298	187	DUP/DEL
chr18	13105162	13127494	22.332	1	loss	TWH	chr18	12988557	13175298	187	DUP/DEL
chr18	64182834	64191390	8.556	4	gain	CH	chr18	64044157	64230509	186	DEL
chr18	64183842	64189780	5.938	4	gain	MM	chr18	64044157	64230509	186	DEL
chr18	64184165	64190295	6.13	4	gain	ARB	chr18	64044157	64230509	186	DEL
chr19	5938	11876	5.938	24	gain	MM	chr19	0	1470994	1471	DUP
chr19	1323822	1327439	3.617	5	gain	AMH	chr19	0	1470994	1471	DUP
chr19	1324174	1330112	5.938	4	gain	MM	chr19	0	1470994	1471	DUP
chr19	1324414	1327095	2.681	6	gain	PER	chr19	0	1470994	1471	DUP
chr19	1325032	1328754	3.722	4	gain	TWH	chr19	0	1470994	1471	DUP
chr19	2309882	2369262	59.38	16	gain	MM	chr19	2252022	3091907	840	DUP/DEL
chr19	2310120	2370012	59.892	14	gain	CH	chr19	2252022	3091907	840	DUP/DEL
chr19	2311010	2314075	3.065	4	gain	ARB	chr19	2252022	3091907	840	DUP/DEL
chr19	2311263	2365518	54.255	11	gain	AMH	chr19	2252022	3091907	840	DUP/DEL
chr19	2311362	2363470	52.108	11	gain	TWH	chr19	2252022	3091907	840	DUP/DEL
chr19	2313703	2364642	50.939	16	gain	PER	chr19	2252022	3091907	840	DUP/DEL
chr19	2314075	2366180	52.105	14	gain	ARB	chr19	2252022	3091907	840	DUP/DEL
chr19	2363470	2367192	3.722	4	gain	TWH	chr19	2252022	3091907	840	DUP/DEL
chr19	2370012	2378568	8.556	3	gain	CH	chr19	2252022	3091907	840	DUP/DEL
chr19	2378568	2395680	17.112	5	gain	CH	chr19	2252022	3091907	840	DUP/DEL
chr19	2395680	2455572	59.892	4	gain	CH	chr19	2252022	3091907	840	DUP/DEL
chr19	2408922	2412539	3.617	4	gain	AMH	chr19	2252022	3091907	840	DUP/DEL
chr19	2412539	2416156	3.617	8	gain	AMH	chr19	2252022	3091907	840	DUP/DEL
chr19	2416156	2441475	25.319	3	gain	AMH	chr19	2252022	3091907	840	DUP/DEL
chr19	2427480	2442805	15.325	3	gain	ARB	chr19	2252022	3091907	840	DUP/DEL
chr19	2428642	2452394	23.752	4	gain	MM	chr19	2252022	3091907	840	DUP/DEL
chr19	2428986	2434348	5.362	5	gain	PER	chr19	2252022	3091907	840	DUP/DEL
chr19	2430466	2434188	3.722	6	gain	TWH	chr19	2252022	3091907	840	DUP/DEL
chr19	2434188	2441632	7.444	3	gain	TWH	chr19	2252022	3091907	840	DUP/DEL
chr19	2434348	2453115	18.767	3	gain	PER	chr19	2252022	3091907	840	DUP/DEL
chr19	2441475	2466794	25.319	4	gain	AMH	chr19	2252022	3091907	840	DUP/DEL
chr19	2441632	2445354	3.722	6	gain	TWH	chr19	2252022	3091907	840	DUP/DEL
chr19	2442805	2445870	3.065	6	gain	ARB	chr19	2252022	3091907	840	DUP/DEL
chr19	2445354	2452798	7.444	3	gain	TWH	chr19	2252022	3091907	840	DUP/DEL
chr19	2445870	2455065	9.195	4	gain	ARB	chr19	2252022	3091907	840	DUP/DEL
chr19	2452394	2464270	11.876	6	gain	MM	chr19	2252022	3091907	840	DUP/DEL
chr19	2452798	2463964	11.166	7	gain	TWH	chr19	2252022	3091907	840	DUP/DEL
chr19	2453115	2466520	13.405	6	gain	PER	chr19	2252022	3091907	840	DUP/DEL
chr19	2455065	2467325	12.26	6	gain	ARB	chr19	2252022	3091907	840	DUP/DEL
chr19	2455572	2464128	8.556	7	gain	CH	chr19	2252022	3091907	840	DUP/DEL
chr19	2463964	2486296	22.332	3	gain	TWH	chr19	2252022	3091907	840	DUP/DEL
chr19	2464128	2506908	42.78	3	gain	CH	chr19	2252022	3091907	840	DUP/DEL
chr19	2464270	2505836	41.566	3	gain	MM	chr19	2252022	3091907	840	DUP/DEL
chr19	2466794	2484879	18.085	3	gain	AMH	chr19	2252022	3091907	840	DUP/DEL
chr19	2467325	2507170	39.845	3	gain	ARB	chr19	2252022	3091907	840	DUP/DEL
chr19	2482606	2512097	29.491	4	gain	PER	chr19	2252022	3091907	840	DUP/DEL
chr19	2484879	2513815	28.936	4	gain	AMH	chr19	2252022	3091907	840	DUP/DEL
chr19	2486296	2490018	3.722	6	gain	TWH	chr19	2252022	3091907	840	DUP/DEL
chr19	2490018	2508628	18.61	4	gain	TWH	chr19	2252022	3091907	840	DUP/DEL
chr19	2505836	2511774	5.938	5	gain	MM	chr19	2252022	3091907	840	DUP/DEL
chr19	2506908	2541132	34.224	6	gain	CH	chr19	2252022	3091907	840	DUP/DEL
chr19	2507170	2513300	6.13	6	gain	ARB	chr19	2252022	3091907	840	DUP/DEL
chr19	2508628	2512350	3.722	8	gain	TWH	chr19	2252022	3091907	840	DUP/DEL
chr19	2516072	2527238	11.166	9	gain	TWH	chr19	2252022	3091907	840	DUP/DEL
chr19	2516365	2540885	24.52	7	gain	ARB	chr19	2252022	3091907	840	DUP/DEL
chr19	2517432	2542751	25.319	5	gain	AMH	chr19	2252022	3091907	840	DUP/DEL
chr19	2517459	2546950	29.491	7	gain	PER	chr19	2252022	3091907	840	DUP/DEL
chr19	2517712	2541464	23.752	7	gain	MM	chr19	2252022	3091907	840	DUP/DEL
chr19	2527238	2530960	3.722	3	gain	TWH	chr19	2252022	3091907	840	DUP/DEL
chr19	2530960	2542126	11.166	7	gain	TWH	chr19	2252022	3091907	840	DUP/DEL
chr19	2540885	2562340	21.455	4	gain	ARB	chr19	2252022	3091907	840	DUP/DEL
chr19	2541132	2571078	29.946	3	gain	CH	chr19	2252022	3091907	840	DUP/DEL
chr19	2541464	2559278	17.814	4	gain	MM	chr19	2252022	3091907	840	DUP/DEL
chr19	2542126	2568180	26.054	4	gain	TWH	chr19	2252022	3091907	840	DUP/DEL
chr19	2542751	2571687	28.936	4	gain	AMH	chr19	2252022	3091907	840	DUP/DEL
chr19	2546950	2568398	21.448	4	gain	PER	chr19	2252022	3091907	840	DUP/DEL
chr19	2559278	2565216	5.938	6	gain	MM	chr19	2252022	3091907	840	DUP/DEL
chr19	2562340	2565405	3.065	6	gain	ARB	chr19	2252022	3091907	840	DUP/DEL
chr19	2565405	2580730	15.325	3	gain	ARB	chr19	2252022	3091907	840	DUP/DEL
chr19	2580730	2596055	15.325	0	loss	ARB	chr19	2252022	3091907	840	DUP/DEL
chr19	2581803	2597889	16.086	1	loss	PER	chr19	2252022	3091907	840	DUP/DEL
chr19	2583030	2600844	17.814	1	loss	MM	chr19	2252022	3091907	840	DUP/DEL
chr19	2597006	2622325	25.319	3	gain	AMH	chr19	2252022	3091907	840	DUP/DEL
chr19	2597889	2600570	2.681	5	gain	PER	chr19	2252022	3091907	840	DUP/DEL
chr19	2612844	2616566	3.722	4	gain	TWH	chr19	2252022	3091907	840	DUP/DEL
chr19	2921496	2927434	5.938	5	gain	MM	chr19	2252022	3091907	840	DUP/DEL
chr19	2924010	2966920	42.91	12	gain	ARB	chr19	2252022	3091907	840	DUP/DEL
chr19	2924971	2965186	40.215	14	gain	PER	chr19	2252022	3091907	840	DUP/DEL
chr19	2925492	2966434	40.942	13	gain	TWH	chr19	2252022	3091907	840	DUP/DEL
chr19	2926152	2968932	42.78	12	gain	CH	chr19	2252022	3091907	840	DUP/DEL
chr19	2926153	2965940	39.787	12	gain	AMH	chr19	2252022	3091907	840	DUP/DEL
chr19	2927434	2963062	35.628	16	gain	MM	chr19	2252022	3091907	840	DUP/DEL
chr19	2963062	2969000	5.938	4	gain	MM	chr19	2252022	3091907	840	DUP/DEL
chr19	3050214	3058770	8.556	5	gain	CH	chr19	2252022	3091907	840	DUP/DEL
chr19	3052740	3055805	3.065	5	gain	ARB	chr19	2252022	3091907	840	DUP/DEL
chr19	4832312	4904652	72.34	1	loss	AMH	chr19	4722512	5441759	719	DUP/DEL
chr19	4833505	4907065	73.56	1	loss	ARB	chr19	4722512	5441759	719	DUP/DEL
chr19	4833532	4916664	83.132	1	loss	MM	chr19	4722512	5441759	719	DUP/DEL
chr19	4833843	4906230	72.387	1	loss	PER	chr19	4722512	5441759	719	DUP/DEL
chr19	4834140	4911144	77.004	1	loss	CH	chr19	4722512	5441759	719	DUP/DEL
chr19	4911144	4971036	59.892	16	gain	CH	chr19	4722512	5441759	719	DUP/DEL
chr19	30821640	30827770	6.13	8	gain	ARB	chr19	30653347	31187238	534	DUP
chr19	36227872	36238723	10.851	4	gain	AMH	chr19	36056686	36249557	193	DUP
chr19	36228353	36236396	8.043	7	gain	PER	chr19	36056686	36249557	193	DUP
chr2	219598	297760	78.162	0	loss	TWH	chr2	210686	308967	98	DUP
chr2	219706	296900	77.194	0	loss	MM	chr2	210686	308967	98	DUP
chr2	219842	297591	77.749	0	loss	PER	chr2	210686	308967	98	DUP
chr2	220637	296594	75.957	0	loss	AMH	chr2	210686	308967	98	DUP
chr2	220680	297305	76.625	1	loss	ARB	chr2	210686	308967	98	DUP
chr2	222456	286626	64.17	1	loss	CH	chr2	210686	308967	98	DUP
chr2	11662232	11763178	100.946	1	loss	MM	chr2	11284116	12523577	1239	DUP/DEL
chr2	11665031	11772271	107.24	1	loss	PER	chr2	11284116	12523577	1239	DUP/DEL
chr2	11768778	11858616	89.838	1	loss	CH	chr2	11284116	12523577	1239	DUP/DEL
chr2	13522780	13525845	3.065	4	gain	ARB	chr2	13512394	15571130	2059	DUP/DEL
chr2	13523963	13527580	3.617	5	gain	AMH	chr2	13512394	15571130	2059	DUP/DEL
chr2	15136926	15372854	235.928	1	loss	PER	chr2	13512394	15571130	2059	DUP/DEL
chr2	15137145	15162464	25.319	1	loss	AMH	chr2	13512394	15571130	2059	DUP/DEL
chr2	15162464	15169698	7.234	3	gain	AMH	chr2	13512394	15571130	2059	DUP/DEL
chr2	15169698	15372250	202.552	1	loss	AMH	chr2	13512394	15571130	2059	DUP/DEL
chr2	22766292	22914742	148.45	1	loss	MM	chr2	19026989	40299213	21272	DUP
chr2	22766820	22917005	150.185	1	loss	ARB	chr2	19026989	40299213	21272	DUP
chr2	22767052	22917188	150.136	1	loss	PER	chr2	19026989	40299213	21272	DUP
chr2	22767516	22917246	149.73	1	loss	CH	chr2	19026989	40299213	21272	DUP
chr2	22772632	22917312	144.68	1	loss	AMH	chr2	19026989	40299213	21272	DUP
chr2	22774918	22916354	141.436	1	loss	TWH	chr2	19026989	40299213	21272	DUP
chr2	23670174	23678730	8.556	4	gain	CH	chr2	19026989	40299213	21272	DUP
chr2	26507232	26661620	154.388	1	loss	MM	chr2	19026989	40299213	21272	DUP
chr2	26508993	26664524	155.531	1	loss	AMH	chr2	19026989	40299213	21272	DUP
chr2	26509185	26659370	150.185	1	loss	ARB	chr2	19026989	40299213	21272	DUP
chr2	26509728	26659864	150.136	1	loss	PER	chr2	19026989	40299213	21272	DUP
chr2	26510766	26656218	145.452	1	loss	CH	chr2	19026989	40299213	21272	DUP
chr2	26511806	26660686	148.88	1	loss	TWH	chr2	19026989	40299213	21272	DUP
chr2	31268965	31406411	137.446	1	loss	AMH	chr2	19026989	40299213	21272	DUP
chr2	31269508	31406082	136.574	1	loss	MM	chr2	19026989	40299213	21272	DUP
chr2	31271184	31407915	136.731	1	loss	PER	chr2	19026989	40299213	21272	DUP
chr2	31272180	31404798	132.618	1	loss	CH	chr2	19026989	40299213	21272	DUP
chr2	31272195	31407055	134.86	1	loss	ARB	chr2	19026989	40299213	21272	DUP
chr2	31272244	31406236	133.992	1	loss	TWH	chr2	19026989	40299213	21272	DUP
chr2	34863974	34886306	22.332	1	loss	TWH	chr2	19026989	40299213	21272	DUP
chr2	35242030	35289534	47.504	1	loss	MM	chr2	19026989	40299213	21272	DUP
chr2	39225870	39232000	6.13	4	gain	ARB	chr2	19026989	40299213	21272	DUP
chr2	39226158	39233602	7.444	4	gain	TWH	chr2	19026989	40299213	21272	DUP
chr2	39226365	39233599	7.234	4	gain	AMH	chr2	19026989	40299213	21272	DUP
chr2	39226428	39232366	5.938	4	gain	MM	chr2	19026989	40299213	21272	DUP
chr2	39229260	39233538	4.278	6	gain	CH	chr2	19026989	40299213	21272	DUP
chr2	47538231	47563550	25.319	3	gain	AMH	chr2	43081111	51162825	8082	DUP/DEL
chr2	49085736	49149010	63.274	3	gain	TWH	chr2	43081111	51162825	8082	DUP/DEL
chr2	55934850	56144472	209.622	1	loss	CH	chr2	55909827	56290933	381	DUP
chr2	55935960	56149728	213.768	1	loss	MM	chr2	55909827	56290933	381	DUP
chr2	55937938	56146370	208.432	1	loss	TWH	chr2	55909827	56290933	381	DUP
chr2	55939065	56148183	209.118	1	loss	PER	chr2	55909827	56290933	381	DUP
chr2	55939315	56150800	211.485	1	loss	ARB	chr2	55909827	56290933	381	DUP
chr2	55940522	56146691	206.169	1	loss	AMH	chr2	55909827	56290933	381	DUP
chr2	68242656	68293992	51.336	1	loss	CH	chr2	67854007	68586828	733	DEL
chr2	68242870	68298700	55.83	1	loss	TWH	chr2	67854007	68586828	733	DEL
chr2	68245434	68298876	53.442	1	loss	MM	chr2	67854007	68586828	733	DEL
chr2	68245556	68299811	54.255	1	loss	AMH	chr2	67854007	68586828	733	DEL
chr2	68247536	68298475	50.939	1	loss	PER	chr2	67854007	68586828	733	DEL
chr2	68248355	68297395	49.04	1	loss	ARB	chr2	67854007	68586828	733	DEL
chr2	73775949	73779566	3.617	0	loss	AMH	chr2	73313942	73864093	550	DUP/DEL
chr20	23752	95008	71.256	3	gain	MM	chr20	0	649401	649	DUP
chr20	32553	47021	14.468	5	gain	AMH	chr20	0	649401	649	DUP
chr20	33715	98080	64.365	3	gain	ARB	chr20	0	649401	649	DUP
chr20	47021	97659	50.638	3	gain	AMH	chr20	0	649401	649	DUP
chr20	96772	387088	290.316	5	gain	TWH	chr20	0	649401	649	DUP
chr20	97659	387019	289.36	6	gain	AMH	chr20	0	649401	649	DUP
chr20	98080	386190	288.11	4	gain	ARB	chr20	0	649401	649	DUP
chr20	99197	388745	289.548	6	gain	PER	chr20	0	649401	649	DUP
chr20	273148	290962	17.814	6	gain	MM	chr20	0	649401	649	DUP
chr20	282348	286626	4.278	10	gain	CH	chr20	0	649401	649	DUP
chr20	286626	333684	47.058	3	gain	CH	chr20	0	649401	649	DUP
chr20	290962	332528	41.566	4	gain	MM	chr20	0	649401	649	DUP
chr20	332528	385970	53.442	5	gain	MM	chr20	0	649401	649	DUP
chr20	333684	389298	55.614	4	gain	CH	chr20	0	649401	649	DUP
chr20	385970	516606	130.636	3	gain	MM	chr20	0	649401	649	DUP
chr20	386190	511855	125.665	3	gain	ARB	chr20	0	649401	649	DUP
chr20	387019	513614	126.595	4	gain	AMH	chr20	0	649401	649	DUP
chr20	387088	513636	126.548	4	gain	TWH	chr20	0	649401	649	DUP
chr20	388745	485261	96.516	4	gain	PER	chr20	0	649401	649	DUP
chr20	485261	498666	13.405	15	gain	PER	chr20	0	649401	649	DUP
chr20	498666	512071	13.405	4	gain	PER	chr20	0	649401	649	DUP
chr20	511855	603805	91.95	4	gain	ARB	chr20	0	649401	649	DUP
chr20	512071	603225	91.154	6	gain	PER	chr20	0	649401	649	DUP
chr20	513360	590364	77.004	3	gain	CH	chr20	0	649401	649	DUP
chr20	513614	604039	90.425	6	gain	AMH	chr20	0	649401	649	DUP
chr20	513636	591798	78.162	5	gain	TWH	chr20	0	649401	649	DUP
chr20	516606	605676	89.07	4	gain	MM	chr20	0	649401	649	DUP
chr20	590364	603198	12.834	5	gain	CH	chr20	0	649401	649	DUP
chr20	591798	602964	11.166	8	gain	TWH	chr20	0	649401	649	DUP
chr20	602964	647628	44.664	4	gain	TWH	chr20	0	649401	649	DUP
chr20	603225	646121	42.896	4	gain	PER	chr20	0	649401	649	DUP
chr20	604039	647443	43.404	4	gain	AMH	chr20	0	649401	649	DUP
chr20	29321844	29345596	23.752	0	loss	MM	chr20	28731700	35604382	6873	DUP/DEL
chr20	29941985	29997155	55.17	1	loss	ARB	chr20	28731700	35604382	6873	DUP/DEL
chr20	29943490	29995598	52.108	1	loss	TWH	chr20	28731700	35604382	6873	DUP/DEL
chr20	30005752	30029881	24.129	3	gain	PER	chr20	28731700	35604382	6873	DUP/DEL
chr20	30034404	30070032	35.628	1	loss	MM	chr20	28731700	35604382	6873	DUP/DEL
chr20	30241182	30292518	51.336	4	gain	CH	chr20	28731700	35604382	6873	DUP/DEL
chr20	30241250	30259860	18.61	6	gain	TWH	chr20	28731700	35604382	6873	DUP/DEL
chr20	30241680	30292619	50.939	6	gain	PER	chr20	28731700	35604382	6873	DUP/DEL
chr20	30242234	30254110	11.876	6	gain	MM	chr20	28731700	35604382	6873	DUP/DEL
chr20	30242355	30251550	9.195	6	gain	ARB	chr20	28731700	35604382	6873	DUP/DEL
chr20	30251550	30291395	39.845	3	gain	ARB	chr20	28731700	35604382	6873	DUP/DEL
chr20	30254110	30325366	71.256	4	gain	MM	chr20	28731700	35604382	6873	DUP/DEL
chr20	30259860	30300802	40.942	4	gain	TWH	chr20	28731700	35604382	6873	DUP/DEL
chr20	30291395	30297525	6.13	1	loss	ARB	chr20	28731700	35604382	6873	DUP/DEL
chr20	30296796	30322464	25.668	5	gain	CH	chr20	28731700	35604382	6873	DUP/DEL
chr20	30297525	30371085	73.56	5	gain	ARB	chr20	28731700	35604382	6873	DUP/DEL
chr20	30297981	30370368	72.387	8	gain	PER	chr20	28731700	35604382	6873	DUP/DEL
chr20	30300802	30375242	74.44	5	gain	TWH	chr20	28731700	35604382	6873	DUP/DEL
chr20	30322464	30369522	47.058	4	gain	CH	chr20	28731700	35604382	6873	DUP/DEL
chr20	30325366	30372870	47.504	5	gain	MM	chr20	28731700	35604382	6873	DUP/DEL
chr20	30370368	30405221	34.853	3	gain	PER	chr20	28731700	35604382	6873	DUP/DEL
chr20	30459360	30489306	29.946	4	gain	CH	chr20	28731700	35604382	6873	DUP/DEL
chr20	30473816	30491630	17.814	4	gain	MM	chr20	28731700	35604382	6873	DUP/DEL
chr20	30475295	30490620	15.325	4	gain	ARB	chr20	28731700	35604382	6873	DUP/DEL
chr20	31088226	31148118	59.892	1	loss	CH	chr20	28731700	35604382	6873	DUP/DEL
chr20	31633119	31651886	18.767	3	gain	PER	chr20	28731700	35604382	6873	DUP/DEL
chr20	31633278	31666776	33.498	3	gain	TWH	chr20	28731700	35604382	6873	DUP/DEL
chr20	31633865	31753400	119.535	3	gain	ARB	chr20	28731700	35604382	6873	DUP/DEL
chr20	31634282	31692154	57.872	4	gain	AMH	chr20	28731700	35604382	6873	DUP/DEL
chr20	31637664	31768300	130.636	3	gain	MM	chr20	28731700	35604382	6873	DUP/DEL
chr20	31651886	31665291	13.405	5	gain	PER	chr20	28731700	35604382	6873	DUP/DEL
chr20	31666776	31700274	33.498	0	loss	TWH	chr20	28731700	35604382	6873	DUP/DEL
chr20	31692154	31829600	137.446	6	gain	AMH	chr20	28731700	35604382	6873	DUP/DEL
chr20	31748402	31788617	40.215	3	gain	PER	chr20	28731700	35604382	6873	DUP/DEL
chr20	31748660	31770992	22.332	4	gain	TWH	chr20	28731700	35604382	6873	DUP/DEL
chr20	31753400	31768725	15.325	4	gain	ARB	chr20	28731700	35604382	6873	DUP/DEL
chr20	31768725	31826960	58.235	3	gain	ARB	chr20	28731700	35604382	6873	DUP/DEL
chr20	31788617	31911943	123.326	1	loss	PER	chr20	28731700	35604382	6873	DUP/DEL
chr20	31826960	31891325	64.365	0	loss	ARB	chr20	28731700	35604382	6873	DUP/DEL
chr20	31827680	31892998	65.318	0	loss	MM	chr20	28731700	35604382	6873	DUP/DEL
chr20	31829600	31891089	61.489	3	gain	AMH	chr20	28731700	35604382	6873	DUP/DEL
chr20	31830544	31912428	81.884	1	loss	TWH	chr20	28731700	35604382	6873	DUP/DEL
chr20	31891089	31912791	21.702	6	gain	AMH	chr20	28731700	35604382	6873	DUP/DEL
chr20	32979652	33068722	89.07	1	loss	MM	chr20	28731700	35604382	6873	DUP/DEL
chr20	32980642	33211406	230.764	1	loss	TWH	chr20	28731700	35604382	6873	DUP/DEL
chr20	32981662	33070135	88.473	1	loss	PER	chr20	28731700	35604382	6873	DUP/DEL
chr20	33065220	33092805	27.585	3	gain	ARB	chr20	28731700	35604382	6873	DUP/DEL
chr20	33068722	33098412	29.69	4	gain	MM	chr20	28731700	35604382	6873	DUP/DEL
chr20	33070135	33102307	32.172	3	gain	PER	chr20	28731700	35604382	6873	DUP/DEL
chr20	33098412	33389374	290.962	1	loss	MM	chr20	28731700	35604382	6873	DUP/DEL
chr20	33102307	33292658	190.351	1	loss	PER	chr20	28731700	35604382	6873	DUP/DEL
chr20	33103164	33210114	106.95	1	loss	CH	chr20	28731700	35604382	6873	DUP/DEL
chr20	33210114	33424014	213.9	3	gain	CH	chr20	28731700	35604382	6873	DUP/DEL
chr20	33211406	33218850	7.444	4	gain	TWH	chr20	28731700	35604382	6873	DUP/DEL
chr20	33218850	33293290	74.44	1	loss	TWH	chr20	28731700	35604382	6873	DUP/DEL
chr20	33293290	33367730	74.44	3	gain	TWH	chr20	28731700	35604382	6873	DUP/DEL
chr20	33822848	33959422	136.574	1	loss	MM	chr20	28731700	35604382	6873	DUP/DEL
chr20	33892770	33975525	82.755	1	loss	ARB	chr20	28731700	35604382	6873	DUP/DEL
chr20	33893202	33978994	85.792	1	loss	PER	chr20	28731700	35604382	6873	DUP/DEL
chr20	33894594	33975876	81.282	1	loss	CH	chr20	28731700	35604382	6873	DUP/DEL
chr20	33978994	34072829	93.835	3	gain	PER	chr20	28731700	35604382	6873	DUP/DEL
chr20	34176942	34185498	8.556	5	gain	CH	chr20	28731700	35604382	6873	DUP/DEL
chr21	14888	37220	22.332	0	loss	TWH	chr21	0	4523341	4523	DUP/DEL
chr21	98394	149730	51.336	3	gain	CH	chr21	0	4523341	4523	DUP/DEL
chr21	100494	260540	160.046	3	gain	TWH	chr21	0	4523341	4523	DUP/DEL
chr21	101276	112127	10.851	4	gain	AMH	chr21	0	4523341	4523	DUP/DEL
chr21	112127	224254	112.127	6	gain	AMH	chr21	0	4523341	4523	DUP/DEL
chr21	224254	285743	61.489	3	gain	AMH	chr21	0	4523341	4523	DUP/DEL
chr21	225644	285024	59.38	3	gain	MM	chr21	0	4523341	4523	DUP/DEL
chr21	278070	282348	4.278	5	gain	CH	chr21	0	4523341	4523	DUP/DEL
chr21	487582	573188	85.606	3	gain	TWH	chr21	0	4523341	4523	DUP/DEL
chr21	500526	594642	94.116	5	gain	CH	chr21	0	4523341	4523	DUP/DEL
chr21	501347	568372	67.025	4	gain	PER	chr21	0	4523341	4523	DUP/DEL
chr21	502660	576220	73.56	4	gain	ARB	chr21	0	4523341	4523	DUP/DEL
chr21	504730	593800	89.07	5	gain	MM	chr21	0	4523341	4523	DUP/DEL
chr21	506380	564252	57.872	5	gain	AMH	chr21	0	4523341	4523	DUP/DEL
chr21	564252	575103	10.851	3	gain	AMH	chr21	0	4523341	4523	DUP/DEL
chr21	568372	769447	201.075	9	gain	PER	chr21	0	4523341	4523	DUP/DEL
chr21	573188	681126	107.938	10	gain	TWH	chr21	0	4523341	4523	DUP/DEL
chr21	575103	763187	188.084	8	gain	AMH	chr21	0	4523341	4523	DUP/DEL
chr21	576220	680430	104.21	12	gain	ARB	chr21	0	4523341	4523	DUP/DEL
chr21	593800	872886	279.086	9	gain	MM	chr21	0	4523341	4523	DUP/DEL
chr21	594642	680202	85.56	11	gain	CH	chr21	0	4523341	4523	DUP/DEL
chr21	680202	684480	4.278	3	gain	CH	chr21	0	4523341	4523	DUP/DEL
chr21	683495	873525	190.03	8	gain	ARB	chr21	0	4523341	4523	DUP/DEL
chr21	684480	778596	94.116	8	gain	CH	chr21	0	4523341	4523	DUP/DEL
chr21	684848	893280	208.432	8	gain	TWH	chr21	0	4523341	4523	DUP/DEL
chr21	763187	802974	39.787	4	gain	AMH	chr21	0	4523341	4523	DUP/DEL
chr21	769447	788214	18.767	5	gain	PER	chr21	0	4523341	4523	DUP/DEL
chr21	788214	890092	101.878	7	gain	PER	chr21	0	4523341	4523	DUP/DEL
chr21	802974	893399	90.425	6	gain	AMH	chr21	0	4523341	4523	DUP/DEL
chr21	804264	872712	68.448	7	gain	CH	chr21	0	4523341	4523	DUP/DEL
chr21	872712	881268	8.556	3	gain	CH	chr21	0	4523341	4523	DUP/DEL
chr21	872886	878824	5.938	4	gain	MM	chr21	0	4523341	4523	DUP/DEL
chr21	873525	879655	6.13	3	gain	ARB	chr21	0	4523341	4523	DUP/DEL
chr21	878824	890700	11.876	6	gain	MM	chr21	0	4523341	4523	DUP/DEL
chr21	879655	891915	12.26	7	gain	ARB	chr21	0	4523341	4523	DUP/DEL
chr21	881268	889824	8.556	6	gain	CH	chr21	0	4523341	4523	DUP/DEL
chr21	889824	902658	12.834	3	gain	CH	chr21	0	4523341	4523	DUP/DEL
chr21	890092	903497	13.405	3	gain	PER	chr21	0	4523341	4523	DUP/DEL
chr21	1504672	1544459	39.787	4	gain	AMH	chr21	0	4523341	4523	DUP/DEL
chr21	1544459	1551693	7.234	1	loss	AMH	chr21	0	4523341	4523	DUP/DEL
chr21	1551693	1638501	86.808	4	gain	AMH	chr21	0	4523341	4523	DUP/DEL
chr21	1622792	1674900	52.108	0	loss	TWH	chr21	0	4523341	4523	DUP/DEL
chr21	1638501	1689139	50.638	7	gain	AMH	chr21	0	4523341	4523	DUP/DEL
chr21	1674900	1686066	11.166	4	gain	TWH	chr21	0	4523341	4523	DUP/DEL
chr21	1686066	1808892	122.826	1	loss	TWH	chr21	0	4523341	4523	DUP/DEL
chr21	1689139	1696373	7.234	4	gain	AMH	chr21	0	4523341	4523	DUP/DEL
chr21	1714458	1772330	57.872	7	gain	AMH	chr21	0	4523341	4523	DUP/DEL
chr21	1808500	1826585	18.085	6	gain	AMH	chr21	0	4523341	4523	DUP/DEL
chr21	1826585	1844670	18.085	3	gain	AMH	chr21	0	4523341	4523	DUP/DEL
chr21	1844670	1938712	94.042	8	gain	AMH	chr21	0	4523341	4523	DUP/DEL
chr21	1894498	1980104	85.606	3	gain	TWH	chr21	0	4523341	4523	DUP/DEL
chr21	1938712	1956797	18.085	4	gain	AMH	chr21	0	4523341	4523	DUP/DEL
chr21	1956797	1978499	21.702	7	gain	AMH	chr21	0	4523341	4523	DUP/DEL
chr21	2642620	2657508	14.888	0	loss	TWH	chr21	0	4523341	4523	DUP/DEL
chr21	2643466	2656871	13.405	0	loss	PER	chr21	0	4523341	4523	DUP/DEL
chr22	694379	697060	2.681	4	gain	PER	chr22	0	1138790	1139	DUP
chr22	694464	705315	10.851	6	gain	AMH	chr22	0	1138790	1139	DUP
chr22	694746	700684	5.938	4	gain	MM	chr22	0	1138790	1139	DUP
chr22	695755	704950	9.195	7	gain	ARB	chr22	0	1138790	1139	DUP
chr22	696014	703458	7.444	10	gain	TWH	chr22	0	1138790	1139	DUP
chr22	697060	705103	8.043	6	gain	PER	chr22	0	1138790	1139	DUP
chr22	697314	705870	8.556	8	gain	CH	chr22	0	1138790	1139	DUP
chr22	700684	706622	5.938	9	gain	MM	chr22	0	1138790	1139	DUP
chr22	712560	718498	5.938	6	gain	MM	chr22	0	1138790	1139	DUP
chr22	714426	735816	21.39	26	gain	CH	chr22	0	1138790	1139	DUP
chr22	714624	733234	18.61	23	gain	TWH	chr22	0	1138790	1139	DUP
chr22	715827	729232	13.405	25	gain	PER	chr22	0	1138790	1139	DUP
chr22	716166	734251	18.085	21	gain	AMH	chr22	0	1138790	1139	DUP
chr22	717210	729470	12.26	24	gain	ARB	chr22	0	1138790	1139	DUP
chr22	718498	730374	11.876	27	gain	MM	chr22	0	1138790	1139	DUP
chr22	729232	734594	5.362	10	gain	PER	chr22	0	1138790	1139	DUP
chr22	729470	735600	6.13	9	gain	ARB	chr22	0	1138790	1139	DUP
chr22	730374	736312	5.938	7	gain	MM	chr22	0	1138790	1139	DUP
chr22	733234	736956	3.722	3	gain	TWH	chr22	0	1138790	1139	DUP
chr22	734251	763187	28.936	1	loss	AMH	chr22	0	1138790	1139	DUP
chr22	734594	764085	29.491	1	loss	PER	chr22	0	1138790	1139	DUP
chr22	735600	763185	27.585	1	loss	ARB	chr22	0	1138790	1139	DUP
chr22	735816	761484	25.668	1	loss	CH	chr22	0	1138790	1139	DUP
chr22	736312	766002	29.69	1	loss	MM	chr22	0	1138790	1139	DUP
chr22	736956	763010	26.054	1	loss	TWH	chr22	0	1138790	1139	DUP
chr22	763010	774176	11.166	3	gain	TWH	chr22	0	1138790	1139	DUP
chr22	763185	772380	9.195	3	gain	ARB	chr22	0	1138790	1139	DUP
chr22	764085	772128	8.043	4	gain	PER	chr22	0	1138790	1139	DUP
chr22	766002	771940	5.938	4	gain	MM	chr22	0	1138790	1139	DUP
chr22	1032905	1039035	6.13	5	gain	ARB	chr22	0	1138790	1139	DUP
chr22	1033212	1039150	5.938	4	gain	MM	chr22	0	1138790	1139	DUP
chr22	1034462	1038079	3.617	5	gain	AMH	chr22	0	1138790	1139	DUP
chr22	1034716	1038438	3.722	5	gain	TWH	chr22	0	1138790	1139	DUP
chr22	1034866	1037547	2.681	5	gain	PER	chr22	0	1138790	1139	DUP
chr22	1035276	1039554	4.278	6	gain	CH	chr22	0	1138790	1139	DUP
chr22	1037547	1040228	2.681	3	gain	PER	chr22	0	1138790	1139	DUP
chr22	18822154	18952424	130.27	0	loss	TWH	chr22	18625266	19333681	708	DUP
chr22	18822868	18953080	130.212	0	loss	AMH	chr22	18625266	19333681	708	DUP
chr22	18823200	18951540	128.34	0	loss	CH	chr22	18625266	19333681	708	DUP
chr22	18823301	18951989	128.688	0	loss	PER	chr22	18625266	19333681	708	DUP
chr22	18823460	18954096	130.636	1	loss	MM	chr22	18625266	19333681	708	DUP
chr22	18825230	18950895	125.665	0	loss	ARB	chr22	18625266	19333681	708	DUP
chr22	21354768	21412640	57.872	1	loss	AMH	chr22	19904371	22064000	2160	DUP/DEL
chr22	21378294	21402423	24.129	3	gain	PER	chr22	19904371	22064000	2160	DUP/DEL
chr22	21454170	21582510	128.34	1	loss	CH	chr22	19904371	22064000	2160	DUP/DEL
chr22	21456043	21579369	123.326	1	loss	PER	chr22	19904371	22064000	2160	DUP/DEL
chr22	21459661	21582639	122.978	1	loss	AMH	chr22	19904371	22064000	2160	DUP/DEL
chr22	21459932	21578692	118.76	1	loss	MM	chr22	19904371	22064000	2160	DUP/DEL
chr22	21461052	21580156	119.104	1	loss	TWH	chr22	19904371	22064000	2160	DUP/DEL
chr22	21461130	21580665	119.535	1	loss	ARB	chr22	19904371	22064000	2160	DUP/DEL
chr22	23128510	23134448	5.938	3	gain	MM	chr22	22552509	24314147	1762	DUP/DEL
chr22	23131146	23139702	8.556	10	gain	CH	chr22	22552509	24314147	1762	DUP/DEL
chr22	23131555	23134620	3.065	4	gain	ARB	chr22	22552509	24314147	1762	DUP/DEL
chr22	23134332	23137949	3.617	13	gain	AMH	chr22	22552509	24314147	1762	DUP/DEL
chr22	23134349	23139711	5.362	8	gain	PER	chr22	22552509	24314147	1762	DUP/DEL
chr22	23134448	23140386	5.938	13	gain	MM	chr22	22552509	24314147	1762	DUP/DEL
chr22	23134620	23137685	3.065	20	gain	ARB	chr22	22552509	24314147	1762	DUP/DEL
chr22	23135952	23139674	3.722	15	gain	TWH	chr22	22552509	24314147	1762	DUP/DEL
chr22	24722195	24776450	54.255	1	loss	AMH	chr22	24558932	24862393	303	DUP
chr22	24722290	24774395	52.105	1	loss	ARB	chr22	24558932	24862393	303	DUP
chr22	24724182	24775121	50.939	1	loss	PER	chr22	24558932	24862393	303	DUP
chr22	24765342	24782454	17.112	4	gain	CH	chr22	24558932	24862393	303	DUP
chr22	24774395	24783590	9.195	3	gain	ARB	chr22	24558932	24862393	303	DUP
chr22	24775121	24783164	8.043	3	gain	PER	chr22	24558932	24862393	303	DUP
chr22	24776450	24780067	3.617	4	gain	AMH	chr22	24558932	24862393	303	DUP
chr22	24780067	24859641	79.574	1	loss	AMH	chr22	24558932	24862393	303	DUP
chr22	24783164	24860913	77.749	1	loss	PER	chr22	24558932	24862393	303	DUP
chr22	24783590	24857150	73.56	1	loss	ARB	chr22	24558932	24862393	303	DUP
chr22	28331864	28343030	11.166	4	gain	TWH	chr22	27580175	29449322	1869	DUP/DEL
chr22	28333194	28341750	8.556	5	gain	CH	chr22	27580175	29449322	1869	DUP/DEL
chr22	39311503	39314184	2.681	4	gain	PER	chr22	38938868	39482674	544	DUP
chr22	43145508	43270206	124.698	1	loss	MM	chr22	42975156	44668301	1693	DUP/DEL
chr22	43147908	43276248	128.34	1	loss	CH	chr22	42975156	44668301	1693	DUP/DEL
chr22	43148014	43274021	126.007	1	loss	PER	chr22	42975156	44668301	1693	DUP/DEL
chr22	43149070	43274735	125.665	1	loss	ARB	chr22	42975156	44668301	1693	DUP/DEL
chr22	43149146	43275694	126.548	1	loss	TWH	chr22	42975156	44668301	1693	DUP/DEL
chr22	43150810	43273788	122.978	1	loss	AMH	chr22	42975156	44668301	1693	DUP/DEL
chr22	47984024	47987746	3.722	6	gain	TWH	chr22	47342509	49946797	2604	DUP/DEL
chr22	47984538	47987219	2.681	5	gain	PER	chr22	47342509	49946797	2604	DUP/DEL
chr22	49271418	49290185	18.767	3	gain	PER	chr22	47342509	49946797	2604	DUP/DEL
chr23	2694135	2700265	6.13	5	gain	ARB	chr23	2681859	2753892	72	DUP
chr23	2695140	2699418	4.278	5	gain	CH	chr23	2681859	2753892	72	DUP
chr23	2695852	2701790	5.938	5	gain	MM	chr23	2681859	2753892	72	DUP
chr23	2892799	2895480	2.681	5	gain	PER	chr23	2789657	2909335	120	DUP
chr23	5955814	6157706	201.892	0	loss	MM	chr23	5498140	9533081	4035	DUP/DEL
chr23	5957199	6156134	198.935	0	loss	AMH	chr23	5498140	9533081	4035	DUP/DEL
chr23	5958360	6157585	199.225	0	loss	ARB	chr23	5498140	9533081	4035	DUP/DEL
chr23	5958922	6156188	197.266	1	loss	TWH	chr23	5498140	9533081	4035	DUP/DEL
chr23	5959254	6156042	196.788	1	loss	CH	chr23	5498140	9533081	4035	DUP/DEL
chr23	6156042	6168876	12.834	4	gain	CH	chr23	5498140	9533081	4035	DUP/DEL
chr23	6156188	6171076	14.888	5	gain	TWH	chr23	5498140	9533081	4035	DUP/DEL
chr23	6157706	6169582	11.876	3	gain	MM	chr23	5498140	9533081	4035	DUP/DEL
chr23	6158257	6171662	13.405	5	gain	PER	chr23	5498140	9533081	4035	DUP/DEL
chr23	6171662	6203834	32.172	3	gain	PER	chr23	5498140	9533081	4035	DUP/DEL
chr23	6203100	6215934	12.834	4	gain	CH	chr23	5498140	9533081	4035	DUP/DEL
chr23	6203834	6217239	13.405	4	gain	PER	chr23	5498140	9533081	4035	DUP/DEL
chr23	6228080	6252600	24.52	1	loss	ARB	chr23	5498140	9533081	4035	DUP/DEL
chr23	6228474	6318899	90.425	0	loss	AMH	chr23	5498140	9533081	4035	DUP/DEL
chr23	6228962	6312094	83.132	0	loss	MM	chr23	5498140	9533081	4035	DUP/DEL
chr23	6230628	6401840	171.212	1	loss	TWH	chr23	5498140	9533081	4035	DUP/DEL
chr23	6252600	6313900	61.3	0	loss	ARB	chr23	5498140	9533081	4035	DUP/DEL
chr23	6312094	6401164	89.07	1	loss	MM	chr23	5498140	9533081	4035	DUP/DEL
chr23	6318899	6402090	83.191	1	loss	AMH	chr23	5498140	9533081	4035	DUP/DEL
chr23	6351289	6399547	48.258	1	loss	PER	chr23	5498140	9533081	4035	DUP/DEL
chr23	6399547	6418314	18.767	3	gain	PER	chr23	5498140	9533081	4035	DUP/DEL
chr23	6399888	6412722	12.834	3	gain	CH	chr23	5498140	9533081	4035	DUP/DEL
chr23	6401164	6413040	11.876	3	gain	MM	chr23	5498140	9533081	4035	DUP/DEL
chr23	6401840	6413006	11.166	4	gain	TWH	chr23	5498140	9533081	4035	DUP/DEL
chr23	6402090	6416558	14.468	3	gain	AMH	chr23	5498140	9533081	4035	DUP/DEL
chr23	6402785	6411980	9.195	4	gain	ARB	chr23	5498140	9533081	4035	DUP/DEL
chr23	6411980	6451825	39.845	7	gain	ARB	chr23	5498140	9533081	4035	DUP/DEL
chr23	6412722	6451224	38.502	7	gain	CH	chr23	5498140	9533081	4035	DUP/DEL
chr23	6413006	6453948	40.942	7	gain	TWH	chr23	5498140	9533081	4035	DUP/DEL
chr23	6413040	6454606	41.566	6	gain	MM	chr23	5498140	9533081	4035	DUP/DEL
chr23	6416558	6445494	28.936	6	gain	AMH	chr23	5498140	9533081	4035	DUP/DEL
chr23	6418314	6453167	34.853	6	gain	PER	chr23	5498140	9533081	4035	DUP/DEL
chr23	6445494	6485281	39.787	4	gain	AMH	chr23	5498140	9533081	4035	DUP/DEL
chr23	6451224	6468336	17.112	3	gain	CH	chr23	5498140	9533081	4035	DUP/DEL
chr23	6451825	6470215	18.39	4	gain	ARB	chr23	5498140	9533081	4035	DUP/DEL
chr23	6453167	6477296	24.129	3	gain	PER	chr23	5498140	9533081	4035	DUP/DEL
chr23	6453948	6468836	14.888	3	gain	TWH	chr23	5498140	9533081	4035	DUP/DEL
chr23	6454606	6478358	23.752	4	gain	MM	chr23	5498140	9533081	4035	DUP/DEL
chr23	6468336	6498282	29.946	5	gain	CH	chr23	5498140	9533081	4035	DUP/DEL
chr23	6468836	6494890	26.054	5	gain	TWH	chr23	5498140	9533081	4035	DUP/DEL
chr23	6470215	6522320	52.105	5	gain	ARB	chr23	5498140	9533081	4035	DUP/DEL
chr23	6477296	6493382	16.086	5	gain	PER	chr23	5498140	9533081	4035	DUP/DEL
chr23	6478358	6519924	41.566	6	gain	MM	chr23	5498140	9533081	4035	DUP/DEL
chr23	6485281	6521451	36.17	6	gain	AMH	chr23	5498140	9533081	4035	DUP/DEL
chr23	6493382	6498744	5.362	3	gain	PER	chr23	5498140	9533081	4035	DUP/DEL
chr23	6494890	6498612	3.722	3	gain	TWH	chr23	5498140	9533081	4035	DUP/DEL
chr23	6498282	6519672	21.39	8	gain	CH	chr23	5498140	9533081	4035	DUP/DEL
chr23	6498612	6520944	22.332	8	gain	TWH	chr23	5498140	9533081	4035	DUP/DEL
chr23	6498744	6512149	13.405	10	gain	PER	chr23	5498140	9533081	4035	DUP/DEL
chr23	6512149	6522873	10.724	5	gain	PER	chr23	5498140	9533081	4035	DUP/DEL
chr23	6519924	6585242	65.318	3	gain	MM	chr23	5498140	9533081	4035	DUP/DEL
chr23	7696122	7935690	239.568	1	loss	CH	chr23	5498140	9533081	4035	DUP/DEL
chr23	7736060	7919960	183.9	1	loss	ARB	chr23	5498140	9533081	4035	DUP/DEL
chr23	7738038	7916694	178.656	1	loss	TWH	chr23	5498140	9533081	4035	DUP/DEL
chr23	7740047	7916993	176.946	1	loss	PER	chr23	5498140	9533081	4035	DUP/DEL
chr23	7921292	7939106	17.814	3	gain	MM	chr23	5498140	9533081	4035	DUP/DEL
chr23	7935690	7969914	34.224	4	gain	CH	chr23	5498140	9533081	4035	DUP/DEL
chr23	7938350	7969000	30.65	4	gain	ARB	chr23	5498140	9533081	4035	DUP/DEL
chr23	7938441	7967932	29.491	4	gain	PER	chr23	5498140	9533081	4035	DUP/DEL
chr23	7939026	7957636	18.61	5	gain	TWH	chr23	5498140	9533081	4035	DUP/DEL
chr23	7939106	7968796	29.69	4	gain	MM	chr23	5498140	9533081	4035	DUP/DEL
chr23	7939315	7957400	18.085	4	gain	AMH	chr23	5498140	9533081	4035	DUP/DEL
chr23	7969914	8021250	51.336	3	gain	CH	chr23	5498140	9533081	4035	DUP/DEL
chr23	8004424	8022238	17.814	3	gain	MM	chr23	5498140	9533081	4035	DUP/DEL
chr23	8011910	8033365	21.455	4	gain	ARB	chr23	5498140	9533081	4035	DUP/DEL
chr23	8020910	8032076	11.166	5	gain	TWH	chr23	5498140	9533081	4035	DUP/DEL
chr23	8021250	8034084	12.834	5	gain	CH	chr23	5498140	9533081	4035	DUP/DEL
chr23	8021552	8032276	10.724	4	gain	PER	chr23	5498140	9533081	4035	DUP/DEL
chr23	8022238	8034114	11.876	5	gain	MM	chr23	5498140	9533081	4035	DUP/DEL
chr23	8022506	8033357	10.851	4	gain	AMH	chr23	5498140	9533081	4035	DUP/DEL
chr23	8300376	8305738	5.362	5	gain	PER	chr23	5498140	9533081	4035	DUP/DEL
chr23	8301015	8340802	39.787	3	gain	AMH	chr23	5498140	9533081	4035	DUP/DEL
chr23	8301324	8307262	5.938	4	gain	MM	chr23	5498140	9533081	4035	DUP/DEL
chr23	8303085	8306150	3.065	5	gain	ARB	chr23	5498140	9533081	4035	DUP/DEL
chr23	8307262	8331014	23.752	3	gain	MM	chr23	5498140	9533081	4035	DUP/DEL
chr23	8329266	8337822	8.556	4	gain	CH	chr23	5498140	9533081	4035	DUP/DEL
chr23	8329836	8337280	7.444	5	gain	TWH	chr23	5498140	9533081	4035	DUP/DEL
chr23	8329867	8335229	5.362	4	gain	PER	chr23	5498140	9533081	4035	DUP/DEL
chr23	8330670	8336800	6.13	5	gain	ARB	chr23	5498140	9533081	4035	DUP/DEL
chr23	8331014	8336952	5.938	5	gain	MM	chr23	5498140	9533081	4035	DUP/DEL
chr23	8728860	8764488	35.628	16	gain	MM	chr23	5498140	9533081	4035	DUP/DEL
chr23	8731398	8761344	29.946	21	gain	CH	chr23	5498140	9533081	4035	DUP/DEL
chr23	8731438	8760374	28.936	15	gain	AMH	chr23	5498140	9533081	4035	DUP/DEL
chr23	8731812	8761588	29.776	24	gain	TWH	chr23	5498140	9533081	4035	DUP/DEL
chr23	8732017	8761508	29.491	27	gain	PER	chr23	5498140	9533081	4035	DUP/DEL
chr23	8732185	8759770	27.585	13	gain	ARB	chr23	5498140	9533081	4035	DUP/DEL
chr23	9616944	9625500	8.556	5	gain	CH	chr23	9578175	9725649	147	DUP
chr23	9617603	9628454	10.851	4	gain	AMH	chr23	9578175	9725649	147	DUP
chr23	9617648	9625092	7.444	5	gain	TWH	chr23	9578175	9725649	147	DUP
chr23	9617970	9627165	9.195	5	gain	ARB	chr23	9578175	9725649	147	DUP
chr23	9619428	9622109	2.681	8	gain	PER	chr23	9578175	9725649	147	DUP
chr23	9619560	9625498	5.938	6	gain	MM	chr23	9578175	9725649	147	DUP
chr23	9622109	9630152	8.043	3	gain	PER	chr23	9578175	9725649	147	DUP
chr23	50413620	50425496	11.876	5	gain	MM	chr23	50318123	50781244	463	DUP/DEL
chr23	50416185	50425380	9.195	4	gain	ARB	chr23	50318123	50781244	463	DUP/DEL
chr23	50416205	50424248	8.043	4	gain	PER	chr23	50318123	50781244	463	DUP/DEL
chr23	50417363	50424597	7.234	4	gain	AMH	chr23	50318123	50781244	463	DUP/DEL
chr23	50418212	50425656	7.444	4	gain	TWH	chr23	50318123	50781244	463	DUP/DEL
chr23	50449248	50568008	118.76	3	gain	MM	chr23	50318123	50781244	463	DUP/DEL
chr24	64365	76625	12.26	8	gain	ARB	chr24	0	1006860	1007	DUP
chr24	66996	78162	11.166	7	gain	TWH	chr24	0	1006860	1007	DUP
chr24	77194	106884	29.69	4	gain	MM	chr24	0	1006860	1007	DUP
chr24	77749	99197	21.448	4	gain	PER	chr24	0	1006860	1007	DUP
chr24	78162	107938	29.776	4	gain	TWH	chr24	0	1006860	1007	DUP
chr24	79574	97659	18.085	4	gain	AMH	chr24	0	1006860	1007	DUP
chr24	89838	98394	8.556	3	gain	CH	chr24	0	1006860	1007	DUP
chr24	106884	124698	17.814	7	gain	MM	chr24	0	1006860	1007	DUP
chr24	107938	126548	18.61	7	gain	TWH	chr24	0	1006860	1007	DUP
chr24	124698	130636	5.938	4	gain	MM	chr24	0	1006860	1007	DUP
chr24	130636	136574	5.938	7	gain	MM	chr24	0	1006860	1007	DUP
chr24	136574	184078	47.504	3	gain	MM	chr24	0	1006860	1007	DUP
chr24	136731	182308	45.577	3	gain	PER	chr24	0	1006860	1007	DUP
chr24	136896	179676	42.78	3	gain	CH	chr24	0	1006860	1007	DUP
chr24	137446	180850	43.404	3	gain	AMH	chr24	0	1006860	1007	DUP
chr24	137925	180835	42.91	3	gain	ARB	chr24	0	1006860	1007	DUP
chr24	145158	182378	37.22	3	gain	TWH	chr24	0	1006860	1007	DUP
chr24	179676	260958	81.282	6	gain	CH	chr24	0	1006860	1007	DUP
chr24	180835	211485	30.65	6	gain	ARB	chr24	0	1006860	1007	DUP
chr24	180850	260424	79.574	8	gain	AMH	chr24	0	1006860	1007	DUP
chr24	182308	206437	24.129	7	gain	PER	chr24	0	1006860	1007	DUP
chr24	182378	204710	22.332	6	gain	TWH	chr24	0	1006860	1007	DUP
chr24	184078	207830	23.752	7	gain	MM	chr24	0	1006860	1007	DUP
chr24	204710	230764	26.054	4	gain	TWH	chr24	0	1006860	1007	DUP
chr24	206437	225204	18.767	4	gain	PER	chr24	0	1006860	1007	DUP
chr24	207830	225644	17.814	4	gain	MM	chr24	0	1006860	1007	DUP
chr24	211485	226810	15.325	4	gain	ARB	chr24	0	1006860	1007	DUP
chr24	225204	262738	37.534	7	gain	PER	chr24	0	1006860	1007	DUP
chr24	226810	260525	33.715	8	gain	ARB	chr24	0	1006860	1007	DUP
chr24	230764	260540	29.776	8	gain	TWH	chr24	0	1006860	1007	DUP
chr24	260424	314679	54.255	3	gain	AMH	chr24	0	1006860	1007	DUP
chr24	260525	315695	55.17	3	gain	ARB	chr24	0	1006860	1007	DUP
chr24	260540	312648	52.108	3	gain	TWH	chr24	0	1006860	1007	DUP
chr24	260958	312294	51.336	3	gain	CH	chr24	0	1006860	1007	DUP
chr24	261272	314714	53.442	3	gain	MM	chr24	0	1006860	1007	DUP
chr24	262738	316358	53.62	3	gain	PER	chr24	0	1006860	1007	DUP
chr24	312294	342240	29.946	11	gain	CH	chr24	0	1006860	1007	DUP
chr24	312648	316370	3.722	4	gain	TWH	chr24	0	1006860	1007	DUP
chr24	314679	339998	25.319	13	gain	AMH	chr24	0	1006860	1007	DUP
chr24	314714	338466	23.752	12	gain	MM	chr24	0	1006860	1007	DUP
chr24	315695	340215	24.52	11	gain	ARB	chr24	0	1006860	1007	DUP
chr24	316358	340487	24.129	12	gain	PER	chr24	0	1006860	1007	DUP
chr24	316370	338702	22.332	12	gain	TWH	chr24	0	1006860	1007	DUP
chr24	338466	344404	5.938	5	gain	MM	chr24	0	1006860	1007	DUP
chr24	338702	342424	3.722	4	gain	TWH	chr24	0	1006860	1007	DUP
chr24	340487	428960	88.473	3	gain	PER	chr24	0	1006860	1007	DUP
chr24	349410	355540	6.13	5	gain	ARB	chr24	0	1006860	1007	DUP
chr24	349868	357312	7.444	4	gain	TWH	chr24	0	1006860	1007	DUP
chr24	350342	356280	5.938	5	gain	MM	chr24	0	1006860	1007	DUP
chr24	350796	355074	4.278	6	gain	CH	chr24	0	1006860	1007	DUP
chr24	415955	419572	3.617	5	gain	AMH	chr24	0	1006860	1007	DUP
chr24	463164	475040	11.876	5	gain	MM	chr24	0	1006860	1007	DUP
chr24	465250	472694	7.444	5	gain	TWH	chr24	0	1006860	1007	DUP
chr24	465880	472010	6.13	7	gain	ARB	chr24	0	1006860	1007	DUP
chr24	466302	470580	4.278	8	gain	CH	chr24	0	1006860	1007	DUP
chr24	466494	471856	5.362	6	gain	PER	chr24	0	1006860	1007	DUP
chr24	466593	473827	7.234	5	gain	AMH	chr24	0	1006860	1007	DUP
chr24	480978	516606	35.628	14	gain	MM	chr24	0	1006860	1007	DUP
chr24	483414	513360	29.946	16	gain	CH	chr24	0	1006860	1007	DUP
chr24	483860	513636	29.776	16	gain	TWH	chr24	0	1006860	1007	DUP
chr24	484270	511855	27.585	15	gain	ARB	chr24	0	1006860	1007	DUP
chr24	484678	517231	32.553	14	gain	AMH	chr24	0	1006860	1007	DUP
chr24	747860	753990	6.13	14	gain	ARB	chr24	0	1006860	1007	DUP
chr24	747999	753361	5.362	16	gain	PER	chr24	0	1006860	1007	DUP
chr24	748122	759288	11.166	9	gain	TWH	chr24	0	1006860	1007	DUP
chr24	748188	754126	5.938	15	gain	MM	chr24	0	1006860	1007	DUP
chr24	748650	765762	17.112	5	gain	CH	chr24	0	1006860	1007	DUP
chr24	748719	755953	7.234	12	gain	AMH	chr24	0	1006860	1007	DUP
chr24	753361	774809	21.448	3	gain	PER	chr24	0	1006860	1007	DUP
chr24	753990	763185	9.195	4	gain	ARB	chr24	0	1006860	1007	DUP
chr24	754126	777878	23.752	4	gain	MM	chr24	0	1006860	1007	DUP
chr24	755953	774038	18.085	3	gain	AMH	chr24	0	1006860	1007	DUP
chr24	759288	777898	18.61	3	gain	TWH	chr24	0	1006860	1007	DUP
chr24	765762	774318	8.556	3	gain	CH	chr24	0	1006860	1007	DUP
chr24	774038	788506	14.468	8	gain	AMH	chr24	0	1006860	1007	DUP
chr24	774318	787152	12.834	11	gain	CH	chr24	0	1006860	1007	DUP
chr24	774809	788214	13.405	9	gain	PER	chr24	0	1006860	1007	DUP
chr24	775445	787705	12.26	12	gain	ARB	chr24	0	1006860	1007	DUP
chr24	777878	789754	11.876	9	gain	MM	chr24	0	1006860	1007	DUP
chr24	777898	789064	11.166	12	gain	TWH	chr24	0	1006860	1007	DUP
chr24	837258	849134	11.876	5	gain	MM	chr24	0	1006860	1007	DUP
chr24	841172	844894	3.722	7	gain	TWH	chr24	0	1006860	1007	DUP
chr24	841834	849877	8.043	7	gain	PER	chr24	0	1006860	1007	DUP
chr24	842761	849995	7.234	6	gain	AMH	chr24	0	1006860	1007	DUP
chr24	842766	851322	8.556	5	gain	CH	chr24	0	1006860	1007	DUP
chr24	842875	849005	6.13	6	gain	ARB	chr24	0	1006860	1007	DUP
chr24	844894	859782	14.888	3	gain	TWH	chr24	0	1006860	1007	DUP
chr24	849005	861265	12.26	3	gain	ARB	chr24	0	1006860	1007	DUP
chr24	849134	861010	11.876	3	gain	MM	chr24	0	1006860	1007	DUP
chr24	849877	863282	13.405	3	gain	PER	chr24	0	1006860	1007	DUP
chr24	849995	864463	14.468	3	gain	AMH	chr24	0	1006860	1007	DUP
chr24	851322	864156	12.834	4	gain	CH	chr24	0	1006860	1007	DUP
chr24	859782	867226	7.444	6	gain	TWH	chr24	0	1006860	1007	DUP
chr24	861010	866948	5.938	7	gain	MM	chr24	0	1006860	1007	DUP
chr24	861265	867395	6.13	7	gain	ARB	chr24	0	1006860	1007	DUP
chr24	863282	868644	5.362	7	gain	PER	chr24	0	1006860	1007	DUP
chr24	864156	868434	4.278	9	gain	CH	chr24	0	1006860	1007	DUP
chr24	864463	868080	3.617	10	gain	AMH	chr24	0	1006860	1007	DUP
chr24	991646	997584	5.938	4	gain	MM	chr24	0	1006860	1007	DUP
chr24	993774	997496	3.722	5	gain	TWH	chr24	0	1006860	1007	DUP
chr3	3491035	3494100	3.065	6	gain	ARB	chr3	3275929	3607930	332	DEL
chr3	3491544	3497482	5.938	5	gain	MM	chr3	3275929	3607930	332	DEL
chr3	117703036	117792106	89.07	5	gain	MM	chr3	117461128	117971223	510	DUP/DEL
chr3	117704892	117794730	89.838	5	gain	CH	chr3	117461128	117971223	510	DUP/DEL
chr3	117705195	117760365	55.17	5	gain	ARB	chr3	117461128	117971223	510	DUP/DEL
chr3	117708250	117790134	81.884	5	gain	TWH	chr3	117461128	117971223	510	DUP/DEL
chr3	117760365	117794080	33.715	4	gain	ARB	chr3	117461128	117971223	510	DUP/DEL
chr4	6142171	6144852	2.681	4	gain	PER	chr4	5871407	6259575	388	DUP/DEL
chr4	8955692	9035266	79.574	1	loss	AMH	chr4	8920676	9779465	859	DUP/DEL
chr4	9115310	9182740	67.43	1	loss	ARB	chr4	8920676	9779465	859	DUP/DEL
chr4	9257342	9387978	130.636	1	loss	MM	chr4	8920676	9779465	859	DUP/DEL
chr4	9257592	9706782	449.19	1	loss	CH	chr4	8920676	9779465	859	DUP/DEL
chr4	9259365	9385030	125.665	1	loss	ARB	chr4	8920676	9779465	859	DUP/DEL
chr4	9259520	9386115	126.595	1	loss	AMH	chr4	8920676	9779465	859	DUP/DEL
chr4	9260174	9321837	61.663	1	loss	PER	chr4	8920676	9779465	859	DUP/DEL
chr4	9260336	9319888	59.552	1	loss	TWH	chr4	8920676	9779465	859	DUP/DEL
chr4	9616747	9678410	61.663	1	loss	PER	chr4	8920676	9779465	859	DUP/DEL
chr4	9637374	9720506	83.132	1	loss	MM	chr4	8920676	9779465	859	DUP/DEL
chr4	9679270	9697660	18.39	3	gain	ARB	chr4	8920676	9779465	859	DUP/DEL
chr4	15517628	15522990	5.362	4	gain	PER	chr4	14937223	15836831	900	DUP
chr4	25284511	25303278	18.767	3	gain	PER	chr4	25276247	26146632	870	DUP
chr4	25326095	25338355	12.26	1	loss	ARB	chr4	25276247	26146632	870	DUP
chr4	25338131	25354217	16.086	3	gain	PER	chr4	25276247	26146632	870	DUP
chr4	25546775	25555970	9.195	23	gain	ARB	chr4	25276247	26146632	870	DUP
chr4	25546871	25557722	10.851	14	gain	AMH	chr4	25276247	26146632	870	DUP
chr4	25627679	25662532	34.853	4	gain	PER	chr4	25276247	26146632	870	DUP
chr4	25628408	25675912	47.504	3	gain	MM	chr4	25276247	26146632	870	DUP
chr4	25629530	25675505	45.975	3	gain	ARB	chr4	25276247	26146632	870	DUP
chr4	25633414	25674356	40.942	4	gain	TWH	chr4	25276247	26146632	870	DUP
chr4	25633679	25677083	43.404	3	gain	AMH	chr4	25276247	26146632	870	DUP
chr4	25662532	25665213	2.681	6	gain	PER	chr4	25276247	26146632	870	DUP
chr4	25665213	25675937	10.724	3	gain	PER	chr4	25276247	26146632	870	DUP
chr4	25674356	25685522	11.166	9	gain	TWH	chr4	25276247	26146632	870	DUP
chr4	25675505	25684700	9.195	7	gain	ARB	chr4	25276247	26146632	870	DUP
chr4	25675912	25687788	11.876	6	gain	MM	chr4	25276247	26146632	870	DUP
chr4	25675937	25686661	10.724	7	gain	PER	chr4	25276247	26146632	870	DUP
chr4	25676556	25685112	8.556	8	gain	CH	chr4	25276247	26146632	870	DUP
chr4	25677083	25684317	7.234	9	gain	AMH	chr4	25276247	26146632	870	DUP
chr4	25684317	25720487	36.17	3	gain	AMH	chr4	25276247	26146632	870	DUP
chr4	25684700	25721480	36.78	3	gain	ARB	chr4	25276247	26146632	870	DUP
chr4	25685112	25723614	38.502	3	gain	CH	chr4	25276247	26146632	870	DUP
chr4	25685522	25722742	37.22	3	gain	TWH	chr4	25276247	26146632	870	DUP
chr4	25686661	25721514	34.853	3	gain	PER	chr4	25276247	26146632	870	DUP
chr4	25687788	25723416	35.628	3	gain	MM	chr4	25276247	26146632	870	DUP
chr4	25720487	25727721	7.234	6	gain	AMH	chr4	25276247	26146632	870	DUP
chr4	25721480	25727610	6.13	6	gain	ARB	chr4	25276247	26146632	870	DUP
chr4	25721514	25726876	5.362	6	gain	PER	chr4	25276247	26146632	870	DUP
chr4	25722742	25730186	7.444	6	gain	TWH	chr4	25276247	26146632	870	DUP
chr4	25723416	25729354	5.938	5	gain	MM	chr4	25276247	26146632	870	DUP
chr4	25723614	25727892	4.278	8	gain	CH	chr4	25276247	26146632	870	DUP
chr4	25726876	25732238	5.362	4	gain	PER	chr4	25276247	26146632	870	DUP
chr4	25729354	25747168	17.814	28	gain	MM	chr4	25276247	26146632	870	DUP
chr4	25730186	25745074	14.888	107	gain	TWH	chr4	25276247	26146632	870	DUP
chr4	25730675	25746000	15.325	159	gain	ARB	chr4	25276247	26146632	870	DUP
chr4	25731338	25745806	14.468	76	gain	AMH	chr4	25276247	26146632	870	DUP
chr4	25732170	25745004	12.834	94	gain	CH	chr4	25276247	26146632	870	DUP
chr4	25732238	25742962	10.724	95	gain	PER	chr4	25276247	26146632	870	DUP
chr4	25742962	25745643	2.681	11	gain	PER	chr4	25276247	26146632	870	DUP
chr4	25745074	25908842	163.768	3	gain	TWH	chr4	25276247	26146632	870	DUP
chr4	25745643	25796582	50.939	3	gain	PER	chr4	25276247	26146632	870	DUP
chr4	25745806	25904954	159.148	3	gain	AMH	chr4	25276247	26146632	870	DUP
chr4	25746000	25905380	159.38	3	gain	ARB	chr4	25276247	26146632	870	DUP
chr4	25818030	25906503	88.473	3	gain	PER	chr4	25276247	26146632	870	DUP
chr4	79874538	79895928	21.39	8	gain	CH	chr4	79696788	79960639	264	DUP
chr4	79877842	79896452	18.61	6	gain	TWH	chr4	79696788	79960639	264	DUP
chr4	79907618	79915062	7.444	5	gain	TWH	chr4	79696788	79960639	264	DUP
chr4	89317165	89338620	21.455	1	loss	ARB	chr4	89008716	89536921	528	DUP
chr4	96369730	96375860	6.13	5	gain	ARB	chr4	96312832	96464910	152	DUP
chr4	96371226	96373907	2.681	6	gain	PER	chr4	96312832	96464910	152	DUP
chr4	97080362	97121928	41.566	1	loss	MM	chr4	96902455	97223128	321	DUP/DEL
chr4	97080654	97123434	42.78	1	loss	CH	chr4	96902455	97223128	321	DUP/DEL
chr4	97080810	97123720	42.91	1	loss	ARB	chr4	96902455	97223128	321	DUP/DEL
chr4	97080926	97121868	40.942	1	loss	TWH	chr4	96902455	97223128	321	DUP/DEL
chr4	97081691	97124587	42.896	1	loss	PER	chr4	96902455	97223128	321	DUP/DEL
chr4	97083897	97123684	39.787	1	loss	AMH	chr4	96902455	97223128	321	DUP/DEL
chr4	102297440	102533445	236.005	3	gain	ARB	chr4	101998265	103039226	1041	DUP/DEL
chr4	102299864	102543322	243.458	3	gain	MM	chr4	101998265	103039226	1041	DUP/DEL
chr4	102303228	102324930	21.702	4	gain	AMH	chr4	101998265	103039226	1041	DUP/DEL
chr4	102304092	102372540	68.448	3	gain	CH	chr4	101998265	103039226	1041	DUP/DEL
chr4	102407108	102537378	130.27	3	gain	TWH	chr4	101998265	103039226	1041	DUP/DEL
chr4	102419598	102423876	4.278	7	gain	CH	chr4	101998265	103039226	1041	DUP/DEL
chr4	102423876	102458100	34.224	3	gain	CH	chr4	101998265	103039226	1041	DUP/DEL
chr4	102458100	102539382	81.282	4	gain	CH	chr4	101998265	103039226	1041	DUP/DEL
chr4	102533445	102539575	6.13	5	gain	ARB	chr4	101998265	103039226	1041	DUP/DEL
chr4	102534716	102538333	3.617	5	gain	AMH	chr4	101998265	103039226	1041	DUP/DEL
chr5	34865700	34874256	8.556	5	gain	CH	chr5	34865201	49273028	14408	DUP
chr5	36132730	36138668	5.938	5	gain	MM	chr5	34865201	49273028	14408	DUP
chr5	37534098	37635044	100.946	1	loss	MM	chr5	34865201	49273028	14408	DUP
chr5	37535172	37637844	102.672	1	loss	CH	chr5	34865201	49273028	14408	DUP
chr5	37536370	37636864	100.494	1	loss	TWH	chr5	34865201	49273028	14408	DUP
chr5	37536681	37635878	99.197	1	loss	PER	chr5	34865201	49273028	14408	DUP
chr5	37537055	37635135	98.08	1	loss	ARB	chr5	34865201	49273028	14408	DUP
chr5	37537226	37638502	101.276	1	loss	AMH	chr5	34865201	49273028	14408	DUP
chr5	37635135	37714825	79.69	3	gain	ARB	chr5	34865201	49273028	14408	DUP
chr5	37636864	37715026	78.162	3	gain	TWH	chr5	34865201	49273028	14408	DUP
chr5	37880335	37892595	12.26	0	loss	ARB	chr5	34865201	49273028	14408	DUP
chr5	37881690	37894524	12.834	0	loss	CH	chr5	34865201	49273028	14408	DUP
chr5	37882516	37893682	11.166	0	loss	TWH	chr5	34865201	49273028	14408	DUP
chr5	39079530	39088086	8.556	4	gain	CH	chr5	34865201	49273028	14408	DUP
chr5	41150082	41175750	25.668	7	gain	CH	chr5	34865201	49273028	14408	DUP
chr5	41468905	41476139	7.234	5	gain	AMH	chr5	34865201	49273028	14408	DUP
chr5	41696636	41702574	5.938	4	gain	MM	chr5	34865201	49273028	14408	DUP
chr5	42490352	42583402	93.05	1	loss	TWH	chr5	34865201	49273028	14408	DUP
chr5	42491169	42582323	91.154	1	loss	PER	chr5	34865201	49273028	14408	DUP
chr5	43776774	44046288	269.514	1	loss	CH	chr5	34865201	49273028	14408	DUP
chr5	43822440	44036208	213.768	1	loss	MM	chr5	34865201	49273028	14408	DUP
chr5	43822828	44046148	223.32	1	loss	TWH	chr5	34865201	49273028	14408	DUP
chr5	43823370	44047115	223.745	1	loss	ARB	chr5	34865201	49273028	14408	DUP
chr5	43823626	44046149	222.523	1	loss	PER	chr5	34865201	49273028	14408	DUP
chr5	43899529	43913997	14.468	9	gain	AMH	chr5	34865201	49273028	14408	DUP
chr5	43913997	43964635	50.638	4	gain	AMH	chr5	34865201	49273028	14408	DUP
chr5	43964635	43982720	18.085	7	gain	AMH	chr5	34865201	49273028	14408	DUP
chr5	43982720	44044209	61.489	1	loss	AMH	chr5	34865201	49273028	14408	DUP
chr5	44044209	44051443	7.234	4	gain	AMH	chr5	34865201	49273028	14408	DUP
chr5	44046149	44051511	5.362	5	gain	PER	chr5	34865201	49273028	14408	DUP
chr5	44046288	44050566	4.278	6	gain	CH	chr5	34865201	49273028	14408	DUP
chr5	44201647	44257948	56.301	1	loss	PER	chr5	34865201	49273028	14408	DUP
chr5	44202472	44265746	63.274	1	loss	TWH	chr5	34865201	49273028	14408	DUP
chr5	44203357	44264846	61.489	1	loss	AMH	chr5	34865201	49273028	14408	DUP
chr5	44203430	44264730	61.3	1	loss	ARB	chr5	34865201	49273028	14408	DUP
chr5	44204574	44268744	64.17	1	loss	CH	chr5	34865201	49273028	14408	DUP
chr5	44257948	44303525	45.577	0	loss	PER	chr5	34865201	49273028	14408	DUP
chr5	44264846	44297399	32.553	4	gain	AMH	chr5	34865201	49273028	14408	DUP
chr5	44265746	44295522	29.776	4	gain	TWH	chr5	34865201	49273028	14408	DUP
chr5	44267790	44291542	23.752	4	gain	MM	chr5	34865201	49273028	14408	DUP
chr5	44291542	44333108	41.566	8	gain	MM	chr5	34865201	49273028	14408	DUP
chr5	44294412	44332914	38.502	6	gain	CH	chr5	34865201	49273028	14408	DUP
chr5	44295380	44310705	15.325	4	gain	ARB	chr5	34865201	49273028	14408	DUP
chr5	44295522	44332742	37.22	7	gain	TWH	chr5	34865201	49273028	14408	DUP
chr5	44297399	44333569	36.17	6	gain	AMH	chr5	34865201	49273028	14408	DUP
chr5	44303525	44316930	13.405	3	gain	PER	chr5	34865201	49273028	14408	DUP
chr5	44310705	44332160	21.455	7	gain	ARB	chr5	34865201	49273028	14408	DUP
chr5	44316930	44333016	16.086	6	gain	PER	chr5	34865201	49273028	14408	DUP
chr5	45465690	45556115	90.425	3	gain	AMH	chr5	34865201	49273028	14408	DUP
chr5	45466210	45472340	6.13	5	gain	ARB	chr5	34865201	49273028	14408	DUP
chr5	45467266	45473204	5.938	5	gain	MM	chr5	34865201	49273028	14408	DUP
chr5	45496860	45512185	15.325	5	gain	ARB	chr5	34865201	49273028	14408	DUP
chr5	45496956	45514770	17.814	5	gain	MM	chr5	34865201	49273028	14408	DUP
chr5	45500808	45513642	12.834	5	gain	CH	chr5	34865201	49273028	14408	DUP
chr5	45513642	45552144	38.502	3	gain	CH	chr5	34865201	49273028	14408	DUP
chr5	45532584	45645406	112.822	1	loss	MM	chr5	34865201	49273028	14408	DUP
chr5	45552144	45556422	4.278	5	gain	CH	chr5	34865201	49273028	14408	DUP
chr5	45556115	45783986	227.871	1	loss	AMH	chr5	34865201	49273028	14408	DUP
chr5	45556422	45654816	98.394	1	loss	CH	chr5	34865201	49273028	14408	DUP
chr5	47930712	47939268	8.556	4	gain	CH	chr5	34865201	49273028	14408	DUP
chr5	48448350	48452628	4.278	6	gain	CH	chr5	34865201	49273028	14408	DUP
chr5	48449274	48452996	3.722	5	gain	TWH	chr5	34865201	49273028	14408	DUP
chr5	88175226	88254800	79.574	1	loss	AMH	chr5	88159243	88308825	150	DUP
chr5	88176985	88253610	76.625	1	loss	ARB	chr5	88159243	88308825	150	DUP
chr5	88177902	88252342	74.44	1	loss	TWH	chr5	88159243	88308825	150	DUP
chr5	88178090	88253158	75.068	1	loss	PER	chr5	88159243	88308825	150	DUP
chr5	88178136	88250862	72.726	1	loss	CH	chr5	88159243	88308825	150	DUP
chr5	88179300	88256494	77.194	1	loss	MM	chr5	88159243	88308825	150	DUP
chr6	162564	192510	29.946	3	gain	CH	chr6	0	269472	269	DUP
chr6	162765	177233	14.468	4	gain	AMH	chr6	0	269472	269	DUP
chr6	165510	168575	3.065	5	gain	ARB	chr6	0	269472	269	DUP
chr6	166222	168903	2.681	5	gain	PER	chr6	0	269472	269	DUP
chr6	166264	178140	11.876	3	gain	MM	chr6	0	269472	269	DUP
chr6	168903	174265	5.362	3	gain	PER	chr6	0	269472	269	DUP
chr6	171212	174934	3.722	5	gain	TWH	chr6	0	269472	269	DUP
chr6	174265	176946	2.681	6	gain	PER	chr6	0	269472	269	DUP
chr6	6344218	6351452	7.234	0	loss	AMH	chr6	6305623	6462567	157	DEL
chr6	19396452	19400730	4.278	5	gain	CH	chr6	19330218	19651767	322	DUP/DEL
chr6	25646222	25658098	11.876	4	gain	MM	chr6	22723739	28685768	5962	DUP
chr6	25646446	25654489	8.043	3	gain	PER	chr6	22723739	28685768	5962	DUP
chr6	26930645	26936007	5.362	4	gain	PER	chr6	22723739	28685768	5962	DUP
chr6	26932182	26935799	3.617	4	gain	AMH	chr6	22723739	28685768	5962	DUP
chr6	27657196	27667920	10.724	3	gain	PER	chr6	22723739	28685768	5962	DUP
chr6	27661625	27667755	6.13	3	gain	ARB	chr6	22723739	28685768	5962	DUP
chr6	27661904	27665626	3.722	3	gain	TWH	chr6	22723739	28685768	5962	DUP
chr6	27665142	27671080	5.938	13	gain	MM	chr6	22723739	28685768	5962	DUP
chr6	27665626	27673070	7.444	11	gain	TWH	chr6	22723739	28685768	5962	DUP
chr6	27665826	27674382	8.556	10	gain	CH	chr6	22723739	28685768	5962	DUP
chr6	27666433	27673667	7.234	8	gain	AMH	chr6	22723739	28685768	5962	DUP
chr6	27667755	27673885	6.13	13	gain	ARB	chr6	22723739	28685768	5962	DUP
chr6	27667920	27673282	5.362	12	gain	PER	chr6	22723739	28685768	5962	DUP
chr6	27671080	27677018	5.938	4	gain	MM	chr6	22723739	28685768	5962	DUP
chr6	27673070	27680514	7.444	3	gain	TWH	chr6	22723739	28685768	5962	DUP
chr6	27673282	27678644	5.362	4	gain	PER	chr6	22723739	28685768	5962	DUP
chr6	27673667	27677284	3.617	4	gain	AMH	chr6	22723739	28685768	5962	DUP
chr6	27673885	27680015	6.13	4	gain	ARB	chr6	22723739	28685768	5962	DUP
chr6	27674382	27678660	4.278	4	gain	CH	chr6	22723739	28685768	5962	DUP
chr6	27714012	27721456	7.444	4	gain	TWH	chr6	22723739	28685768	5962	DUP
chr6	27938290	27967980	29.69	15	gain	MM	chr6	22723739	28685768	5962	DUP
chr6	27939618	27969564	29.946	19	gain	CH	chr6	22723739	28685768	5962	DUP
chr6	27940540	27968125	27.585	14	gain	ARB	chr6	22723739	28685768	5962	DUP
chr6	27941054	27967108	26.054	14	gain	TWH	chr6	22723739	28685768	5962	DUP
chr6	27941325	27970261	28.936	20	gain	AMH	chr6	22723739	28685768	5962	DUP
chr6	27941382	27968192	26.81	17	gain	PER	chr6	22723739	28685768	5962	DUP
chr6	27969564	28097904	128.34	3	gain	CH	chr6	22723739	28685768	5962	DUP
chr6	27970261	27984729	14.468	1	loss	AMH	chr6	22723739	28685768	5962	DUP
chr6	27984729	27988346	3.617	5	gain	AMH	chr6	22723739	28685768	5962	DUP
chr6	30051428	30055150	3.722	5	gain	TWH	chr6	29958160	33948314	3990	DUP/DEL
chr6	30052325	30055390	3.065	5	gain	ARB	chr6	29958160	33948314	3990	DUP/DEL
chr6	30052950	30057228	4.278	5	gain	CH	chr6	29958160	33948314	3990	DUP/DEL
chr6	33298020	33300701	2.681	5	gain	PER	chr6	29958160	33948314	3990	DUP/DEL
chr6	37710570	37719126	8.556	4	gain	CH	chr6	37677534	37726186	49	DEL
chr6	67028144	67040020	11.876	1	loss	MM	chr6	66988253	67095694	107	DUP
chr6	67028485	67040745	12.26	1	loss	ARB	chr6	66988253	67095694	107	DUP
chr6	67029498	67040664	11.166	0	loss	TWH	chr6	66988253	67095694	107	DUP
chr6	67030244	67041095	10.851	0	loss	AMH	chr6	66988253	67095694	107	DUP
chr6	67030362	67041086	10.724	0	loss	PER	chr6	66988253	67095694	107	DUP
chr6	67031982	67040538	8.556	0	loss	CH	chr6	66988253	67095694	107	DUP
chr6	70651004	70673336	22.332	3	gain	TWH	chr6	68969349	71442856	2474	DUP/DEL
chr6	70651170	70672560	21.39	4	gain	CH	chr6	68969349	71442856	2474	DUP/DEL
chr6	70666640	70685030	18.39	0	loss	ARB	chr6	68969349	71442856	2474	DUP/DEL
chr6	72900826	73013648	112.822	1	loss	MM	chr6	72820611	74555569	1735	DUP/DEL
chr6	72902814	73010752	107.938	1	loss	TWH	chr6	72820611	74555569	1735	DUP/DEL
chr6	73008992	73110870	101.878	1	loss	PER	chr6	72820611	74555569	1735	DUP/DEL
chr6	73010752	73111246	100.494	0	loss	TWH	chr6	72820611	74555569	1735	DUP/DEL
chr6	73011365	73112510	101.145	1	loss	ARB	chr6	72820611	74555569	1735	DUP/DEL
chr6	73012626	73111020	98.394	1	loss	CH	chr6	72820611	74555569	1735	DUP/DEL
chr6	73012762	73110421	97.659	1	loss	AMH	chr6	72820611	74555569	1735	DUP/DEL
chr6	73013648	73108656	95.008	0	loss	MM	chr6	72820611	74555569	1735	DUP/DEL
chr6	73108656	73453060	344.404	1	loss	MM	chr6	72820611	74555569	1735	DUP/DEL
chr6	73111246	73449948	338.702	1	loss	TWH	chr6	72820611	74555569	1735	DUP/DEL
chr6	73725311	74322116	596.805	1	loss	AMH	chr6	72820611	74555569	1735	DUP/DEL
chr6	74051901	74124288	72.387	1	loss	PER	chr6	72820611	74555569	1735	DUP/DEL
chr6	74052798	74124054	71.256	1	loss	MM	chr6	72820611	74555569	1735	DUP/DEL
chr6	74053465	74123960	70.495	1	loss	ARB	chr6	72820611	74555569	1735	DUP/DEL
chr6	74172016	74179460	7.444	4	gain	TWH	chr6	72820611	74555569	1735	DUP/DEL
chr6	75193645	75343830	150.185	4	gain	ARB	chr6	75023259	75406228	383	DUP/DEL
chr6	75224352	75228630	4.278	4	gain	CH	chr6	75023259	75406228	383	DUP/DEL
chr7	391908	397846	5.938	6	gain	MM	chr7	0	4828983	4829	DUP/DEL
chr7	393576	397854	4.278	6	gain	CH	chr7	0	4828983	4829	DUP/DEL
chr7	394532	398254	3.722	5	gain	TWH	chr7	0	4828983	4829	DUP/DEL
chr7	397854	705870	308.016	1	loss	CH	chr7	0	4828983	4829	DUP/DEL
chr7	2568180	2571902	3.722	6	gain	TWH	chr7	0	4828983	4829	DUP/DEL
chr7	2571154	2577092	5.938	7	gain	MM	chr7	0	4828983	4829	DUP/DEL
chr7	4554446	4566322	11.876	3	gain	MM	chr7	0	4828983	4829	DUP/DEL
chr7	4556070	4564626	8.556	4	gain	CH	chr7	0	4828983	4829	DUP/DEL
chr7	4557700	4563062	5.362	4	gain	PER	chr7	0	4828983	4829	DUP/DEL
chr7	4559450	4563172	3.722	5	gain	TWH	chr7	0	4828983	4829	DUP/DEL
chr7	27109686	27315030	205.344	1	loss	CH	chr7	26568723	27899281	1331	DUP
chr7	27112908	27308862	195.954	1	loss	MM	chr7	26568723	27899281	1331	DUP
chr7	27114770	27304592	189.822	1	loss	TWH	chr7	26568723	27899281	1331	DUP
chr7	27115634	27305985	190.351	1	loss	PER	chr7	26568723	27899281	1331	DUP
chr7	27116055	27306085	190.03	1	loss	ARB	chr7	26568723	27899281	1331	DUP
chr7	27116649	27308350	191.701	1	loss	AMH	chr7	26568723	27899281	1331	DUP
chr7	30154929	30220035	65.106	1	loss	AMH	chr7	30154838	30759546	605	DUP
chr7	30155622	30219792	64.17	1	loss	CH	chr7	30154838	30759546	605	DUP
chr7	30155644	30218918	63.274	1	loss	TWH	chr7	30154838	30759546	605	DUP
chr7	30155888	30220232	64.344	1	loss	PER	chr7	30154838	30759546	605	DUP
chr7	30156535	30220900	64.365	1	loss	ARB	chr7	30154838	30759546	605	DUP
chr7	30159102	30218482	59.38	1	loss	MM	chr7	30154838	30759546	605	DUP
chr7	43792750	43798688	5.938	4	gain	MM	chr7	43048386	53094544	10046	DUP/DEL
chr7	43955165	43961295	6.13	4	gain	ARB	chr7	43048386	53094544	10046	DUP/DEL
chr7	44768216	45092030	323.814	3	gain	TWH	chr7	43048386	53094544	10046	DUP/DEL
chr7	44769270	45227016	457.746	3	gain	CH	chr7	43048386	53094544	10046	DUP/DEL
chr7	45020799	45089522	68.723	3	gain	AMH	chr7	43048386	53094544	10046	DUP/DEL
chr7	45021785	45092280	70.495	3	gain	ARB	chr7	43048386	53094544	10046	DUP/DEL
chr7	45022033	45089058	67.025	3	gain	PER	chr7	43048386	53094544	10046	DUP/DEL
chr7	45027854	45093172	65.318	3	gain	MM	chr7	43048386	53094544	10046	DUP/DEL
chr7	45223808	45235684	11.876	5	gain	MM	chr7	43048386	53094544	10046	DUP/DEL
chr7	45225789	45247237	21.448	10	gain	PER	chr7	43048386	53094544	10046	DUP/DEL
chr7	45226022	45237188	11.166	4	gain	TWH	chr7	43048386	53094544	10046	DUP/DEL
chr7	45226968	45248670	21.702	15	gain	AMH	chr7	43048386	53094544	10046	DUP/DEL
chr7	45227016	45248406	21.39	25	gain	CH	chr7	43048386	53094544	10046	DUP/DEL
chr7	45227140	45248595	21.455	13	gain	ARB	chr7	43048386	53094544	10046	DUP/DEL
chr7	45235684	45247560	11.876	14	gain	MM	chr7	43048386	53094544	10046	DUP/DEL
chr7	45237188	45244632	7.444	21	gain	TWH	chr7	43048386	53094544	10046	DUP/DEL
chr7	45294570	45297635	3.065	5	gain	ARB	chr7	43048386	53094544	10046	DUP/DEL
chr7	45457015	45496860	39.845	1	loss	ARB	chr7	43048386	53094544	10046	DUP/DEL
chr7	45458028	45500808	42.78	1	loss	CH	chr7	43048386	53094544	10046	DUP/DEL
chr7	45459036	45515337	56.301	1	loss	PER	chr7	43048386	53094544	10046	DUP/DEL
chr7	45514770	45520708	5.938	4	gain	MM	chr7	43048386	53094544	10046	DUP/DEL
chr7	45515250	45518315	3.065	5	gain	ARB	chr7	43048386	53094544	10046	DUP/DEL
chr7	45515337	45593086	77.749	3	gain	PER	chr7	43048386	53094544	10046	DUP/DEL
chr7	45518315	45591875	73.56	3	gain	ARB	chr7	43048386	53094544	10046	DUP/DEL
chr7	47060010	47066140	6.13	4	gain	ARB	chr7	43048386	53094544	10046	DUP/DEL
chr7	47942730	47945795	3.065	6	gain	ARB	chr7	43048386	53094544	10046	DUP/DEL
chr7	48853035	48859165	6.13	5	gain	ARB	chr7	43048386	53094544	10046	DUP/DEL
chr7	48854760	48859038	4.278	6	gain	CH	chr7	43048386	53094544	10046	DUP/DEL
chr7	49332904	49398222	65.318	1	loss	MM	chr7	43048386	53094544	10046	DUP/DEL
chr7	49334240	49398605	64.365	1	loss	ARB	chr7	43048386	53094544	10046	DUP/DEL
chr7	49499168	49582300	83.132	1	loss	MM	chr7	43048386	53094544	10046	DUP/DEL
chr7	49500738	49582020	81.282	1	loss	CH	chr7	43048386	53094544	10046	DUP/DEL
chr7	49501984	49579733	77.749	1	loss	PER	chr7	43048386	53094544	10046	DUP/DEL
chr7	49502262	49581836	79.574	1	loss	AMH	chr7	43048386	53094544	10046	DUP/DEL
chr7	49502600	49580762	78.162	1	loss	TWH	chr7	43048386	53094544	10046	DUP/DEL
chr7	49502815	49582505	79.69	1	loss	ARB	chr7	43048386	53094544	10046	DUP/DEL
chr7	49644077	49652120	8.043	5	gain	PER	chr7	43048386	53094544	10046	DUP/DEL
chr7	49652120	49775446	123.326	1	loss	PER	chr7	43048386	53094544	10046	DUP/DEL
chr7	49665432	49885138	219.706	1	loss	MM	chr7	43048386	53094544	10046	DUP/DEL
chr7	49666368	49774306	107.938	1	loss	TWH	chr7	43048386	53094544	10046	DUP/DEL
chr7	49667580	49774530	106.95	1	loss	CH	chr7	43048386	53094544	10046	DUP/DEL
chr7	49668644	49773537	104.893	1	loss	AMH	chr7	43048386	53094544	10046	DUP/DEL
chr7	49843030	49885940	42.91	1	loss	ARB	chr7	43048386	53094544	10046	DUP/DEL
chr7	51423080	51429018	5.938	6	gain	MM	chr7	43048386	53094544	10046	DUP/DEL
chr7	51425838	51430116	4.278	6	gain	CH	chr7	43048386	53094544	10046	DUP/DEL
chr7	75433974	75643596	209.622	1	loss	CH	chr7	75203979	75664980	461	DUP
chr7	75435780	75444975	9.195	1	loss	ARB	chr7	75203979	75664980	461	DUP
chr7	89721745	89730940	9.195	4	gain	ARB	chr7	89231219	92420357	3189	DUP/DEL
chr7	89722346	89730389	8.043	4	gain	PER	chr7	89231219	92420357	3189	DUP/DEL
chr7	89722494	89731050	8.556	5	gain	CH	chr7	89231219	92420357	3189	DUP/DEL
chr7	89723180	89729118	5.938	6	gain	MM	chr7	89231219	92420357	3189	DUP/DEL
chr7	90209080	90218275	9.195	1	loss	ARB	chr7	89231219	92420357	3189	DUP/DEL
chr7	90685044	90826218	141.174	1	loss	CH	chr7	89231219	92420357	3189	DUP/DEL
chr7	90685136	90827648	142.512	1	loss	MM	chr7	89231219	92420357	3189	DUP/DEL
chr7	90685424	90826487	141.063	1	loss	AMH	chr7	89231219	92420357	3189	DUP/DEL
chr7	90686530	90824244	137.714	1	loss	TWH	chr7	89231219	92420357	3189	DUP/DEL
chr7	90687220	90825145	137.925	1	loss	ARB	chr7	89231219	92420357	3189	DUP/DEL
chr7	90687506	90826918	139.412	1	loss	PER	chr7	89231219	92420357	3189	DUP/DEL
chr8	1238622	1273475	34.853	4	gain	PER	chr8	0	6769072	6769	DUP/DEL
chr8	1239426	1250592	11.166	5	gain	TWH	chr8	0	6769072	6769	DUP/DEL
chr8	1240620	1249176	8.556	8	gain	CH	chr8	0	6769072	6769	DUP/DEL
chr8	1240631	1251482	10.851	8	gain	AMH	chr8	0	6769072	6769	DUP/DEL
chr8	1241042	1258856	17.814	4	gain	MM	chr8	0	6769072	6769	DUP/DEL
chr8	1241325	1250520	9.195	5	gain	ARB	chr8	0	6769072	6769	DUP/DEL
chr8	1249176	1266288	17.112	3	gain	CH	chr8	0	6769072	6769	DUP/DEL
chr8	1250520	1268910	18.39	3	gain	ARB	chr8	0	6769072	6769	DUP/DEL
chr8	1250592	1269202	18.61	4	gain	TWH	chr8	0	6769072	6769	DUP/DEL
chr8	1251482	1262333	10.851	4	gain	AMH	chr8	0	6769072	6769	DUP/DEL
chr8	1262333	1265950	3.617	1	loss	AMH	chr8	0	6769072	6769	DUP/DEL
chr8	1264794	1359802	95.008	18	gain	MM	chr8	0	6769072	6769	DUP/DEL
chr8	1265950	1356375	90.425	19	gain	AMH	chr8	0	6769072	6769	DUP/DEL
chr8	1266288	1356126	89.838	18	gain	CH	chr8	0	6769072	6769	DUP/DEL
chr8	1268910	1357795	88.885	17	gain	ARB	chr8	0	6769072	6769	DUP/DEL
chr8	1269202	1358530	89.328	18	gain	TWH	chr8	0	6769072	6769	DUP/DEL
chr8	1273475	1356586	83.111	20	gain	PER	chr8	0	6769072	6769	DUP/DEL
chr8	1411740	1428852	17.112	4	gain	CH	chr8	0	6769072	6769	DUP/DEL
chr8	1412965	1428290	15.325	4	gain	ARB	chr8	0	6769072	6769	DUP/DEL
chr8	1413244	1425120	11.876	4	gain	MM	chr8	0	6769072	6769	DUP/DEL
chr8	1786560	1846112	59.552	3	gain	TWH	chr8	0	6769072	6769	DUP/DEL
chr8	1786798	1848287	61.489	3	gain	AMH	chr8	0	6769072	6769	DUP/DEL
chr8	1788204	1843818	55.614	3	gain	CH	chr8	0	6769072	6769	DUP/DEL
chr8	1877223	1884457	7.234	9	gain	AMH	chr8	0	6769072	6769	DUP/DEL
chr8	1878042	1882320	4.278	17	gain	CH	chr8	0	6769072	6769	DUP/DEL
chr8	1879381	2050965	171.584	3	gain	PER	chr8	0	6769072	6769	DUP/DEL
chr8	1879610	1883332	3.722	16	gain	TWH	chr8	0	6769072	6769	DUP/DEL
chr8	1884457	1935095	50.638	4	gain	AMH	chr8	0	6769072	6769	DUP/DEL
chr8	1934015	2050485	116.47	4	gain	ARB	chr8	0	6769072	6769	DUP/DEL
chr8	1935095	2029137	94.042	5	gain	AMH	chr8	0	6769072	6769	DUP/DEL
chr8	1935788	2054548	118.76	3	gain	MM	chr8	0	6769072	6769	DUP/DEL
chr8	1997826	2049162	51.336	3	gain	CH	chr8	0	6769072	6769	DUP/DEL
chr8	1998714	2050822	52.108	3	gain	TWH	chr8	0	6769072	6769	DUP/DEL
chr8	2029137	2039988	10.851	3	gain	AMH	chr8	0	6769072	6769	DUP/DEL
chr8	2039988	2047222	7.234	6	gain	AMH	chr8	0	6769072	6769	DUP/DEL
chr8	2143618	2167370	23.752	4	gain	MM	chr8	0	6769072	6769	DUP/DEL
chr8	2145500	2234385	88.885	4	gain	ARB	chr8	0	6769072	6769	DUP/DEL
chr8	2147481	2249359	101.878	5	gain	PER	chr8	0	6769072	6769	DUP/DEL
chr8	2147556	2250228	102.672	7	gain	CH	chr8	0	6769072	6769	DUP/DEL
chr8	2147594	2244366	96.772	5	gain	TWH	chr8	0	6769072	6769	DUP/DEL
chr8	2155732	2235306	79.574	4	gain	AMH	chr8	0	6769072	6769	DUP/DEL
chr8	2167370	2250502	83.132	5	gain	MM	chr8	0	6769072	6769	DUP/DEL
chr8	2244366	2251810	7.444	18	gain	TWH	chr8	0	6769072	6769	DUP/DEL
chr8	2381138	2393014	11.876	8	gain	MM	chr8	0	6769072	6769	DUP/DEL
chr8	2382080	2389524	7.444	11	gain	TWH	chr8	0	6769072	6769	DUP/DEL
chr8	2382846	2391402	8.556	11	gain	CH	chr8	0	6769072	6769	DUP/DEL
chr8	2383409	2506735	123.326	4	gain	PER	chr8	0	6769072	6769	DUP/DEL
chr8	2383603	2390837	7.234	12	gain	AMH	chr8	0	6769072	6769	DUP/DEL
chr8	2384570	2390700	6.13	14	gain	ARB	chr8	0	6769072	6769	DUP/DEL
chr8	2391402	2511186	119.784	3	gain	CH	chr8	0	6769072	6769	DUP/DEL
chr8	3425299	3461469	36.17	1	loss	AMH	chr8	0	6769072	6769	DUP/DEL
chr8	3623466	4196718	573.252	1	loss	CH	chr8	0	6769072	6769	DUP/DEL
chr8	3707425	3877424	169.999	1	loss	AMH	chr8	0	6769072	6769	DUP/DEL
chr8	3707823	3957156	249.333	0	loss	PER	chr8	0	6769072	6769	DUP/DEL
chr8	3708650	4128555	419.905	1	loss	ARB	chr8	0	6769072	6769	DUP/DEL
chr8	3710834	3926710	215.876	0	loss	TWH	chr8	0	6769072	6769	DUP/DEL
chr8	3711250	3883452	172.202	0	loss	MM	chr8	0	6769072	6769	DUP/DEL
chr8	3949764	4130614	180.85	1	loss	AMH	chr8	0	6769072	6769	DUP/DEL
chr8	4126910	4198166	71.256	1	loss	MM	chr8	0	6769072	6769	DUP/DEL
chr8	4128555	4195985	67.43	0	loss	ARB	chr8	0	6769072	6769	DUP/DEL
chr8	4130614	4195720	65.106	0	loss	AMH	chr8	0	6769072	6769	DUP/DEL
chr8	4220505	4490225	269.72	1	loss	ARB	chr8	0	6769072	6769	DUP/DEL
chr8	4220748	4488732	267.984	0	loss	TWH	chr8	0	6769072	6769	DUP/DEL
chr8	4221918	4489128	267.21	0	loss	MM	chr8	0	6769072	6769	DUP/DEL
chr8	4222575	4487994	265.419	1	loss	PER	chr8	0	6769072	6769	DUP/DEL
chr8	4253592	4264443	10.851	4	gain	AMH	chr8	0	6769072	6769	DUP/DEL
chr8	4868482	4915503	47.021	3	gain	AMH	chr8	0	6769072	6769	DUP/DEL
chr8	5518620	5522898	4.278	5	gain	CH	chr8	0	6769072	6769	DUP/DEL
chr8	5682307	5689541	7.234	5	gain	AMH	chr8	0	6769072	6769	DUP/DEL
chr8	5682510	5694770	12.26	4	gain	ARB	chr8	0	6769072	6769	DUP/DEL
chr8	5682666	5694542	11.876	4	gain	MM	chr8	0	6769072	6769	DUP/DEL
chr8	5683494	5687216	3.722	5	gain	TWH	chr8	0	6769072	6769	DUP/DEL
chr8	5683720	5774874	91.154	5	gain	PER	chr8	0	6769072	6769	DUP/DEL
chr8	5687216	5694660	7.444	3	gain	TWH	chr8	0	6769072	6769	DUP/DEL
chr8	5693158	5714860	21.702	9	gain	AMH	chr8	0	6769072	6769	DUP/DEL
chr8	5694018	5715408	21.39	8	gain	CH	chr8	0	6769072	6769	DUP/DEL
chr8	5694542	5712356	17.814	14	gain	MM	chr8	0	6769072	6769	DUP/DEL
chr8	5694660	5713270	18.61	14	gain	TWH	chr8	0	6769072	6769	DUP/DEL
chr8	5694770	5713160	18.39	12	gain	ARB	chr8	0	6769072	6769	DUP/DEL
chr8	5713270	5728158	14.888	3	gain	TWH	chr8	0	6769072	6769	DUP/DEL
chr8	5728158	5743046	14.888	11	gain	TWH	chr8	0	6769072	6769	DUP/DEL
chr8	5728242	5745354	17.112	9	gain	CH	chr8	0	6769072	6769	DUP/DEL
chr8	5728485	5743810	15.325	13	gain	ARB	chr8	0	6769072	6769	DUP/DEL
chr8	5729328	5747413	18.085	10	gain	AMH	chr8	0	6769072	6769	DUP/DEL
chr8	5730170	5742046	11.876	11	gain	MM	chr8	0	6769072	6769	DUP/DEL
chr8	5743046	5839818	96.772	4	gain	TWH	chr8	0	6769072	6769	DUP/DEL
chr8	5745354	5843748	98.394	3	gain	CH	chr8	0	6769072	6769	DUP/DEL
chr8	5859540	5866774	7.234	5	gain	AMH	chr8	0	6769072	6769	DUP/DEL
chr8	5862150	5865872	3.722	6	gain	TWH	chr8	0	6769072	6769	DUP/DEL
chr8	5880760	5899370	18.61	4	gain	TWH	chr8	0	6769072	6769	DUP/DEL
chr8	5882250	5976366	94.116	3	gain	CH	chr8	0	6769072	6769	DUP/DEL
chr8	5976366	5980644	4.278	6	gain	CH	chr8	0	6769072	6769	DUP/DEL
chr8	5977532	5981254	3.722	6	gain	TWH	chr8	0	6769072	6769	DUP/DEL
chr8	5979815	6007400	27.585	0	loss	ARB	chr8	0	6769072	6769	DUP/DEL
chr8	5982518	6011454	28.936	0	loss	AMH	chr8	0	6769072	6769	DUP/DEL
chr8	6006312	6019146	12.834	4	gain	CH	chr8	0	6769072	6769	DUP/DEL
chr8	6007308	6018474	11.166	4	gain	TWH	chr8	0	6769072	6769	DUP/DEL
chr8	6174343	6292307	117.964	1	loss	PER	chr8	0	6769072	6769	DUP/DEL
chr8	6174798	6197130	22.332	0	loss	TWH	chr8	0	6769072	6769	DUP/DEL
chr8	6175520	6199272	23.752	0	loss	MM	chr8	0	6769072	6769	DUP/DEL
chr8	6175975	6197430	21.455	0	loss	ARB	chr8	0	6769072	6769	DUP/DEL
chr8	6214006	6293580	79.574	1	loss	AMH	chr8	0	6769072	6769	DUP/DEL
chr8	6215740	6293902	78.162	1	loss	TWH	chr8	0	6769072	6769	DUP/DEL
chr8	6215820	6292445	76.625	1	loss	ARB	chr8	0	6769072	6769	DUP/DEL
chr8	6215934	6292938	77.004	1	loss	CH	chr8	0	6769072	6769	DUP/DEL
chr8	6217086	6294280	77.194	1	loss	MM	chr8	0	6769072	6769	DUP/DEL
chr8	6509468	6718586	209.118	1	loss	PER	chr8	0	6769072	6769	DUP/DEL
chr8	6687830	6715415	27.585	1	loss	ARB	chr8	0	6769072	6769	DUP/DEL
chr8	6687833	6731237	43.404	1	loss	AMH	chr8	0	6769072	6769	DUP/DEL
chr8	6688434	6729376	40.942	1	loss	TWH	chr8	0	6769072	6769	DUP/DEL
chr8	7084034	7089972	5.938	5	gain	MM	chr8	7072318	7828211	756	DUP
chr8	7084368	7088646	4.278	6	gain	CH	chr8	7072318	7828211	756	DUP
chr8	7085703	7089320	3.617	7	gain	AMH	chr8	7072318	7828211	756	DUP
chr8	7086280	7089345	3.065	9	gain	ARB	chr8	7072318	7828211	756	DUP
chr8	7086688	7090410	3.722	8	gain	TWH	chr8	7072318	7828211	756	DUP
chr8	7089320	7092937	3.617	3	gain	AMH	chr8	7072318	7828211	756	DUP
chr8	7089972	7113724	23.752	0	loss	MM	chr8	7072318	7828211	756	DUP
chr8	7090410	7112742	22.332	0	loss	TWH	chr8	7072318	7828211	756	DUP
chr8	7092937	7114639	21.702	0	loss	AMH	chr8	7072318	7828211	756	DUP
chr8	11334370	11398735	64.365	1	loss	ARB	chr8	8455743	19824356	11369	DUP/DEL
chr8	11337212	11396764	59.552	1	loss	TWH	chr8	8455743	19824356	11369	DUP/DEL
chr8	11339295	11397167	57.872	1	loss	AMH	chr8	8455743	19824356	11369	DUP/DEL
chr8	11340978	11396592	55.614	1	loss	CH	chr8	8455743	19824356	11369	DUP/DEL
chr8	12630126	12748886	118.76	1	loss	MM	chr8	8455743	19824356	11369	DUP/DEL
chr8	12630564	12749925	119.361	1	loss	AMH	chr8	8455743	19824356	11369	DUP/DEL
chr8	12630865	12750400	119.535	1	loss	ARB	chr8	8455743	19824356	11369	DUP/DEL
chr8	12632468	12751572	119.104	1	loss	TWH	chr8	8455743	19824356	11369	DUP/DEL
chr8	12632872	12750836	117.964	1	loss	PER	chr8	8455743	19824356	11369	DUP/DEL
chr8	12632934	12752718	119.784	1	loss	CH	chr8	8455743	19824356	11369	DUP/DEL
chr8	13366438	13408004	41.566	12	gain	MM	chr8	8455743	19824356	11369	DUP/DEL
chr8	13368432	13408219	39.787	13	gain	AMH	chr8	8455743	19824356	11369	DUP/DEL
chr8	13368750	13411530	42.78	9	gain	CH	chr8	8455743	19824356	11369	DUP/DEL
chr8	13369424	13410366	40.942	12	gain	TWH	chr8	8455743	19824356	11369	DUP/DEL
chr8	13369530	13409375	39.845	13	gain	ARB	chr8	8455743	19824356	11369	DUP/DEL
chr8	13370147	13410362	40.215	13	gain	PER	chr8	8455743	19824356	11369	DUP/DEL
chr8	15129911	15368633	238.722	1	loss	AMH	chr8	8455743	19824356	11369	DUP/DEL
chr8	15130024	15230970	100.946	1	loss	MM	chr8	8455743	19824356	11369	DUP/DEL
chr8	15131564	15228080	96.516	1	loss	PER	chr8	8455743	19824356	11369	DUP/DEL
chr8	15228080	15289743	61.663	3	gain	PER	chr8	8455743	19824356	11369	DUP/DEL
chr8	15230970	15290350	59.38	3	gain	MM	chr8	8455743	19824356	11369	DUP/DEL
chr8	15288220	15367910	79.69	0	loss	ARB	chr8	8455743	19824356	11369	DUP/DEL
chr8	15289572	15366576	77.004	0	loss	CH	chr8	8455743	19824356	11369	DUP/DEL
chr8	15289743	15367492	77.749	1	loss	PER	chr8	8455743	19824356	11369	DUP/DEL
chr8	15289976	15368138	78.162	0	loss	TWH	chr8	8455743	19824356	11369	DUP/DEL
chr8	15290350	15367544	77.194	1	loss	MM	chr8	8455743	19824356	11369	DUP/DEL
chr8	18077754	18167082	89.328	1	loss	TWH	chr8	8455743	19824356	11369	DUP/DEL
chr8	18077983	18166456	88.473	1	loss	PER	chr8	8455743	19824356	11369	DUP/DEL
chr8	18078828	18168666	89.838	1	loss	CH	chr8	8455743	19824356	11369	DUP/DEL
chr8	18080435	18169320	88.885	1	loss	ARB	chr8	8455743	19824356	11369	DUP/DEL
chr8	18081210	18170280	89.07	1	loss	MM	chr8	8455743	19824356	11369	DUP/DEL
chr8	18081383	18168191	86.808	1	loss	AMH	chr8	8455743	19824356	11369	DUP/DEL
chr8	29324778	29611645	286.867	1	loss	PER	chr8	29151388	29772196	621	DUP/DEL
chr8	29325638	29612232	286.594	1	loss	TWH	chr8	29151388	29772196	621	DUP/DEL
chr8	29325690	29612316	286.626	1	loss	CH	chr8	29151388	29772196	621	DUP/DEL
chr8	29325920	29614030	288.11	1	loss	ARB	chr8	29151388	29772196	621	DUP/DEL
chr8	29326636	29612379	285.743	1	loss	AMH	chr8	29151388	29772196	621	DUP/DEL
chr8	29327782	29612806	285.024	1	loss	MM	chr8	29151388	29772196	621	DUP/DEL
chr8	66760934	66909384	148.45	1	loss	MM	chr8	66649943	67692739	1043	DUP
chr8	66761514	66910394	148.88	1	loss	TWH	chr8	66649943	67692739	1043	DUP
chr8	66761830	66912015	150.185	1	loss	ARB	chr8	66649943	67692739	1043	DUP
chr8	66762262	66909717	147.455	1	loss	PER	chr8	66649943	67692739	1043	DUP
chr8	66762468	66912198	149.73	1	loss	CH	chr8	66649943	67692739	1043	DUP
chr8	66762586	66910883	148.297	1	loss	AMH	chr8	66649943	67692739	1043	DUP
chr9	361034	439196	78.162	1	loss	TWH	chr9	0	778610	779	DEL
chr9	361670	432165	70.495	1	loss	ARB	chr9	0	778610	779	DEL
chr9	361700	434040	72.34	1	loss	AMH	chr9	0	778610	779	DEL
chr9	361935	437003	75.068	1	loss	PER	chr9	0	778610	779	DEL
chr9	362218	433474	71.256	1	loss	MM	chr9	0	778610	779	DEL
chr9	363630	440634	77.004	1	loss	CH	chr9	0	778610	779	DEL
chr9	470210	509997	39.787	1	loss	AMH	chr9	0	778610	779	DEL
chr9	35898590	35901271	2.681	7	gain	PER	chr9	35769435	35938921	169	DUP
chr9	55723502	55727119	3.617	5	gain	AMH	chr9	54716376	56574211	1858	DEL
chr9	73046526	73094784	48.258	1	loss	PER	chr9	72892458	73266048	374	DUP
chr9	73059684	73093908	34.224	0	loss	CH	chr9	72892458	73266048	374	DUP
chr9	73102718	73144284	41.566	3	gain	MM	chr9	72892458	73266048	374	DUP
chr9	73103187	73142974	39.787	4	gain	AMH	chr9	72892458	73266048	374	DUP
chr9	73103802	73144744	40.942	3	gain	TWH	chr9	72892458	73266048	374	DUP
