# Supplementary material for: Whole genome detection of sequence and structural polymorphism in six diverse horses
Source: PLoS One. 2020 Apr 9;15(4):e0230899. doi: 10.1371/journal.pone.0230899 (PMC7144971; doi:10.1371/journal.pone.0230899)
Supplement: S8 Table — (XLSX) [file pone.0230899.s008.xlsx]

## Sheet: ARB
CHROM	BIN_START	BIN_END	N_VARIANTS	PI
chr1	9700001	9800000	1	1e-05
chr1	25000001	25100000	1	1e-05
chr1	25100001	25200000	1	1e-05
chr1	25900001	26000000	1	1e-05
chr1	26100001	26200000	1	1e-05
chr1	26500001	26600000	1	1e-05
chr1	26800001	26900000	1	1e-05
chr1	27000001	27100000	1	1e-05
chr1	28700001	28800000	1	1e-05
chr1	51200001	51300000	1	1e-05
chr1	70300001	70400000	1	1e-05
chr1	77000001	77100000	1	1e-05
chr1	83100001	83200000	1	1e-05
chr1	116500001	116600000	1	1e-05
chr1	126800001	126900000	1	1e-05
chr1	126900001	127000000	1	1e-05
chr1	148200001	148300000	1	1e-05
chr1	148600001	148700000	1	1e-05
chr1	149900001	150000000	1	1e-05
chr1	157900001	158000000	1	1e-05
chr1	167600001	167700000	1	1e-05
chr1	167800001	167900000	1	1e-05
chr1	168000001	168100000	1	1e-05
chr1	168400001	168500000	1	1e-05
chr1	176700001	176800000	1	1e-05
chr10	65100001	65200000	1	1e-05
chr10	66100001	66200000	1	1e-05
chr10	66600001	66700000	1	1e-05
chr10	67600001	67700000	1	1e-05
chr10	81500001	81600000	1	1e-05
chr10	82700001	82800000	1	1e-05
chr10	85100001	85200000	1	1e-05
chr11	4300001	4400000	1	1e-05
chr11	11300001	11400000	1	1e-05
chr11	16300001	16400000	1	1e-05
chr11	26800001	26900000	1	1e-05
chr11	27000001	27100000	1	1e-05
chr11	27500001	27600000	1	1e-05
chr11	27800001	27900000	1	1e-05
chr11	28400001	28500000	1	1e-05
chr11	29800001	29900000	1	1e-05
chr11	30400001	30500000	1	1e-05
chr11	31300001	31400000	1	1e-05
chr11	31900001	32000000	1	1e-05
chr11	32400001	32500000	1	1e-05
chr11	33400001	33500000	1	1e-05
chr11	33600001	33700000	1	1e-05
chr11	34900001	35000000	1	1e-05
chr11	35000001	35100000	1	1e-05
chr11	35100001	35200000	1	1e-05
chr11	43800001	43900000	1	1e-05
chr11	61500001	61600000	1	1e-05
chr12	16800001	16900000	1	1e-05
chr14	16400001	16500000	1	1e-05
chr14	21500001	21600000	1	1e-05
chr14	22200001	22300000	1	1e-05
chr14	22400001	22500000	1	1e-05
chr14	23900001	24000000	1	1e-05
chr14	24100001	24200000	1	1e-05
chr14	26000001	26100000	1	1e-05
chr14	26600001	26700000	1	1e-05
chr14	27400001	27500000	1	1e-05
chr14	27900001	28000000	1	1e-05
chr14	28300001	28400000	1	1e-05
chr14	29600001	29700000	1	1e-05
chr14	29900001	30000000	1	1e-05
chr14	30100001	30200000	1	1e-05
chr14	32100001	32200000	1	1e-05
chr14	32700001	32800000	1	1e-05
chr14	32800001	32900000	1	1e-05
chr14	33500001	33600000	1	1e-05
chr14	33600001	33700000	1	1e-05
chr14	33800001	33900000	1	1e-05
chr14	34700001	34800000	1	1e-05
chr14	35700001	35800000	1	1e-05
chr14	36000001	36100000	1	1e-05
chr14	36200001	36300000	1	1e-05
chr14	36600001	36700000	1	1e-05
chr14	37100001	37200000	1	1e-05
chr14	37300001	37400000	1	1e-05
chr14	37800001	37900000	1	1e-05
chr14	41500001	41600000	1	1e-05
chr14	42400001	42500000	1	1e-05
chr14	43000001	43100000	1	1e-05
chr14	43400001	43500000	1	1e-05
chr14	44100001	44200000	1	1e-05
chr14	44200001	44300000	1	1e-05
chr14	44900001	45000000	1	1e-05
chr14	46200001	46300000	1	1e-05
chr14	49500001	49600000	1	1e-05
chr14	52200001	52300000	1	1e-05
chr14	52300001	52400000	1	1e-05
chr14	52700001	52800000	1	1e-05
chr14	88400001	88500000	1	1e-05
chr14	90900001	91000000	1	1e-05
chr15	32000001	32100000	1	1e-05
chr15	35100001	35200000	1	1e-05
chr15	40500001	40600000	1	1e-05
chr15	41800001	41900000	1	1e-05
chr15	41900001	42000000	1	1e-05
chr15	42400001	42500000	1	1e-05
chr15	42600001	42700000	1	1e-05
chr15	42900001	43000000	1	1e-05
chr15	43100001	43200000	1	1e-05
chr15	43600001	43700000	1	1e-05
chr15	44600001	44700000	1	1e-05
chr15	45500001	45600000	1	1e-05
chr15	47700001	47800000	1	1e-05
chr15	49000001	49100000	1	1e-05
chr15	49800001	49900000	1	1e-05
chr15	50500001	50600000	1	1e-05
chr15	60500001	60600000	1	1e-05
chr15	64600001	64700000	1	1e-05
chr15	77400001	77500000	1	1e-05
chr15	79800001	79900000	1	1e-05
chr16	56100001	56200000	1	1e-05
chr16	56200001	56300000	1	1e-05
chr16	71500001	71600000	1	1e-05
chr16	74300001	74400000	1	1e-05
chr16	83400001	83500000	1	1e-05
chr16	83500001	83600000	1	1e-05
chr16	84400001	84500000	1	1e-05
chr17	2300001	2400000	1	1e-05
chr17	9400001	9500000	1	1e-05
chr17	9600001	9700000	1	1e-05
chr17	9800001	9900000	1	1e-05
chr17	14200001	14300000	1	1e-05
chr17	18500001	18600000	1	1e-05
chr17	24000001	24100000	1	1e-05
chr17	38500001	38600000	1	1e-05
chr17	39000001	39100000	1	1e-05
chr17	40900001	41000000	1	1e-05
chr17	41300001	41400000	1	1e-05
chr17	42600001	42700000	1	1e-05
chr17	43600001	43700000	1	1e-05
chr17	43700001	43800000	1	1e-05
chr17	44000001	44100000	1	1e-05
chr17	44100001	44200000	1	1e-05
chr17	44400001	44500000	1	1e-05
chr17	45500001	45600000	1	1e-05
chr17	47000001	47100000	1	1e-05
chr17	48400001	48500000	1	1e-05
chr17	49000001	49100000	1	1e-05
chr17	50200001	50300000	1	1e-05
chr17	50400001	50500000	1	1e-05
chr17	56500001	56600000	1	1e-05
chr17	57100001	57200000	1	1e-05
chr17	58400001	58500000	1	1e-05
chr17	71300001	71400000	1	1e-05
chr17	77500001	77600000	1	1e-05
chr18	4000001	4100000	1	1e-05
chr18	5500001	5600000	1	1e-05
chr18	5600001	5700000	1	1e-05
chr18	15000001	15100000	1	1e-05
chr18	17300001	17400000	1	1e-05
chr18	30100001	30200000	1	1e-05
chr18	30500001	30600000	1	1e-05
chr18	31200001	31300000	1	1e-05
chr18	48800001	48900000	1	1e-05
chr18	67800001	67900000	1	1e-05
chr18	67900001	68000000	1	1e-05
chr19	1800001	1900000	1	1e-05
chr19	23400001	23500000	1	1e-05
chr19	29800001	29900000	1	1e-05
chr19	35100001	35200000	1	1e-05
chr19	41900001	42000000	1	1e-05
chr19	44200001	44300000	1	1e-05
chr19	45300001	45400000	1	1e-05
chr19	45800001	45900000	1	1e-05
chr19	46400001	46500000	1	1e-05
chr19	46800001	46900000	1	1e-05
chr19	47900001	48000000	1	1e-05
chr19	51000001	51100000	1	1e-05
chr2	59400001	59500000	1	1e-05
chr2	59500001	59600000	1	1e-05
chr2	60600001	60700000	1	1e-05
chr2	61900001	62000000	1	1e-05
chr2	63900001	64000000	1	1e-05
chr2	64100001	64200000	1	1e-05
chr2	64500001	64600000	1	1e-05
chr2	83800001	83900000	1	1e-05
chr2	84400001	84500000	1	1e-05
chr2	84500001	84600000	1	1e-05
chr2	89800001	89900000	1	1e-05
chr2	90300001	90400000	1	1e-05
chr2	92400001	92500000	1	1e-05
chr2	97400001	97500000	1	1e-05
chr2	99100001	99200000	1	1e-05
chr2	111700001	111800000	1	1e-05
chr20	7600001	7700000	1	1e-05
chr20	8900001	9000000	1	1e-05
chr20	19900001	20000000	1	1e-05
chr20	40000001	40100000	1	1e-05
chr21	11800001	11900000	1	1e-05
chr21	17300001	17400000	1	1e-05
chr21	17900001	18000000	1	1e-05
chr21	29200001	29300000	1	1e-05
chr21	29300001	29400000	1	1e-05
chr21	30500001	30600000	1	1e-05
chr21	43000001	43100000	1	1e-05
chr21	53300001	53400000	1	1e-05
chr22	16300001	16400000	1	1e-05
chr22	19300001	19400000	1	1e-05
chr22	25700001	25800000	1	1e-05
chr22	29600001	29700000	1	1e-05
chr22	36900001	37000000	1	1e-05
chr22	42100001	42200000	1	1e-05
chr22	46900001	47000000	1	1e-05
chr23	4300001	4400000	1	1e-05
chr23	12700001	12800000	1	1e-05
chr23	13000001	13100000	1	1e-05
chr23	13300001	13400000	1	1e-05
chr23	15400001	15500000	1	1e-05
chr23	20000001	20100000	1	1e-05
chr23	28400001	28500000	1	1e-05
chr23	37200001	37300000	1	1e-05
chr23	37300001	37400000	1	1e-05
chr23	41800001	41900000	1	1e-05
chr23	42400001	42500000	1	1e-05
chr23	44300001	44400000	1	1e-05
chr23	45600001	45700000	1	1e-05
chr23	45800001	45900000	1	1e-05
chr23	47200001	47300000	1	1e-05
chr23	49000001	49100000	1	1e-05
chr23	49800001	49900000	1	1e-05
chr23	50600001	50700000	1	1e-05
chr23	53300001	53400000	1	1e-05
chr23	55000001	55100000	1	1e-05
chr24	20200001	20300000	1	1e-05
chr24	26500001	26600000	1	1e-05
chr24	27300001	27400000	1	1e-05
chr24	28300001	28400000	1	1e-05
chr24	29000001	29100000	1	1e-05
chr24	30300001	30400000	1	1e-05
chr24	36200001	36300000	1	1e-05
chr26	10400001	10500000	1	1e-05
chr26	25800001	25900000	1	1e-05
chr26	35700001	35800000	1	1e-05
chr26	37400001	37500000	1	1e-05
chr27	12900001	13000000	1	1e-05
chr27	14400001	14500000	1	1e-05
chr27	14700001	14800000	1	1e-05
chr27	15500001	15600000	1	1e-05
chr27	37100001	37200000	1	1e-05
chr28	1300001	1400000	1	1e-05
chr28	1400001	1500000	1	1e-05
chr28	2600001	2700000	1	1e-05
chr28	7100001	7200000	1	1e-05
chr28	7600001	7700000	1	1e-05
chr28	7800001	7900000	1	1e-05
chr28	8000001	8100000	1	1e-05
chr28	8100001	8200000	1	1e-05
chr28	9000001	9100000	1	1e-05
chr28	9100001	9200000	1	1e-05
chr28	10100001	10200000	1	1e-05
chr28	17000001	17100000	1	1e-05
chr28	24600001	24700000	1	1e-05
chr28	36200001	36300000	1	1e-05
chr29	11300001	11400000	1	1e-05
chr29	12300001	12400000	1	1e-05
chr29	13400001	13500000	1	1e-05
chr29	15500001	15600000	1	1e-05
chr29	26400001	26500000	1	1e-05
chr29	28500001	28600000	1	1e-05
chr29	33100001	33200000	1	1e-05
chr29	34100001	34200000	1	1e-05
chr3	6600001	6700000	1	1e-05
chr3	6900001	7000000	1	1e-05
chr3	12500001	12600000	1	1e-05
chr3	13000001	13100000	1	1e-05
chr3	13500001	13600000	1	1e-05
chr3	13600001	13700000	1	1e-05
chr3	15300001	15400000	1	1e-05
chr3	19900001	20000000	1	1e-05
chr3	29400001	29500000	1	1e-05
chr3	29800001	29900000	1	1e-05
chr3	46700001	46800000	1	1e-05
chr3	50300001	50400000	1	1e-05
chr3	50600001	50700000	1	1e-05
chr3	53000001	53100000	1	1e-05
chr3	54200001	54300000	1	1e-05
chr3	72500001	72600000	1	1e-05
chr3	72600001	72700000	1	1e-05
chr3	82200001	82300000	1	1e-05
chr3	82300001	82400000	1	1e-05
chr3	82600001	82700000	1	1e-05
chr3	82800001	82900000	1	1e-05
chr3	91300001	91400000	1	1e-05
chr3	100900001	101000000	1	1e-05
chr3	102900001	103000000	1	1e-05
chr3	109600001	109700000	1	1e-05
chr3	109800001	109900000	1	1e-05
chr3	109900001	110000000	1	1e-05
chr3	112200001	112300000	1	1e-05
chr3	113000001	113100000	1	1e-05
chr3	113800001	113900000	1	1e-05
chr3	113900001	114000000	1	1e-05
chr3	114700001	114800000	1	1e-05
chr3	115300001	115400000	1	1e-05
chr3	115400001	115500000	1	1e-05
chr3	116900001	117000000	1	1e-05
chr3	118600001	118700000	1	1e-05
chr3	120900001	121000000	1	1e-05
chr30	5100001	5200000	1	1e-05
chr30	13200001	13300000	1	1e-05
chr30	13800001	13900000	1	1e-05
chr30	15100001	15200000	1	1e-05
chr30	16700001	16800000	1	1e-05
chr30	16900001	17000000	1	1e-05
chr30	17200001	17300000	1	1e-05
chr30	18000001	18100000	1	1e-05
chr30	18100001	18200000	1	1e-05
chr30	24900001	25000000	1	1e-05
chr31	1300001	1400000	1	1e-05
chr4	20000001	20100000	1	1e-05
chr4	20300001	20400000	1	1e-05
chr4	35800001	35900000	1	1e-05
chr4	39100001	39200000	1	1e-05
chr4	46800001	46900000	1	1e-05
chr4	50300001	50400000	1	1e-05
chr4	50500001	50600000	1	1e-05
chr4	50600001	50700000	1	1e-05
chr4	54900001	55000000	1	1e-05
chr4	63100001	63200000	1	1e-05
chr4	63400001	63500000	1	1e-05
chr4	63500001	63600000	1	1e-05
chr4	67600001	67700000	1	1e-05
chr4	70300001	70400000	1	1e-05
chr4	70500001	70600000	1	1e-05
chr4	72800001	72900000	1	1e-05
chr4	86100001	86200000	1	1e-05
chr4	86900001	87000000	1	1e-05
chr4	87000001	87100000	1	1e-05
chr4	88400001	88500000	1	1e-05
chr4	91200001	91300000	1	1e-05
chr4	94300001	94400000	1	1e-05
chr5	12200001	12300000	1	1e-05
chr5	38700001	38800000	1	1e-05
chr5	38900001	39000000	1	1e-05
chr5	40400001	40500000	1	1e-05
chr5	42100001	42200000	1	1e-05
chr5	42300001	42400000	1	1e-05
chr5	42900001	43000000	1	1e-05
chr5	60700001	60800000	1	1e-05
chr5	62000001	62100000	1	1e-05
chr5	62200001	62300000	1	1e-05
chr5	85400001	85500000	1	1e-05
chr5	96700001	96800000	1	1e-05
chr6	2200001	2300000	1	1e-05
chr6	3000001	3100000	1	1e-05
chr6	3300001	3400000	1	1e-05
chr6	10300001	10400000	1	1e-05
chr6	12300001	12400000	1	1e-05
chr6	12400001	12500000	1	1e-05
chr6	13700001	13800000	1	1e-05
chr6	32400001	32500000	1	1e-05
chr6	44400001	44500000	1	1e-05
chr6	44500001	44600000	1	1e-05
chr6	44700001	44800000	1	1e-05
chr6	46600001	46700000	1	1e-05
chr6	48600001	48700000	1	1e-05
chr6	50500001	50600000	1	1e-05
chr6	66200001	66300000	1	1e-05
chr6	86100001	86200000	1	1e-05
chr7	7200001	7300000	1	1e-05
chr7	21400001	21500000	1	1e-05
chr7	21900001	22000000	1	1e-05
chr7	22200001	22300000	1	1e-05
chr7	23900001	24000000	1	1e-05
chr7	24800001	24900000	1	1e-05
chr7	25500001	25600000	1	1e-05
chr7	31700001	31800000	1	1e-05
chr7	31900001	32000000	1	1e-05
chr7	32300001	32400000	1	1e-05
chr7	32700001	32800000	1	1e-05
chr7	32800001	32900000	1	1e-05
chr7	33800001	33900000	1	1e-05
chr7	62100001	62200000	1	1e-05
chr7	62400001	62500000	1	1e-05
chr7	62500001	62600000	1	1e-05
chr7	63100001	63200000	1	1e-05
chr7	63600001	63700000	1	1e-05
chr7	65400001	65500000	1	1e-05
chr7	65600001	65700000	1	1e-05
chr7	66600001	66700000	1	1e-05
chr7	66900001	67000000	1	1e-05
chr7	67400001	67500000	1	1e-05
chr7	68900001	69000000	1	1e-05
chr7	69100001	69200000	1	1e-05
chr7	69300001	69400000	1	1e-05
chr7	71200001	71300000	1	1e-05
chr7	71600001	71700000	1	1e-05
chr7	75300001	75400000	1	1e-05
chr7	93000001	93100000	1	1e-05
chr7	93300001	93400000	1	1e-05
chr7	93400001	93500000	1	1e-05
chr7	93600001	93700000	1	1e-05
chr7	97300001	97400000	1	1e-05
chr8	11000001	11100000	1	1e-05
chr8	38800001	38900000	1	1e-05
chr8	50600001	50700000	1	1e-05
chr8	50700001	50800000	1	1e-05
chr8	66400001	66500000	1	1e-05
chr8	66900001	67000000	1	1e-05
chr8	67100001	67200000	1	1e-05
chr8	67400001	67500000	1	1e-05
chr8	76800001	76900000	1	1e-05
chr8	77300001	77400000	1	1e-05
chr8	78000001	78100000	1	1e-05
chr8	90800001	90900000	1	1e-05
chr9	9700001	9800000	1	1e-05
chr9	18600001	18700000	1	1e-05
chr9	18800001	18900000	1	1e-05
chr9	20300001	20400000	1	1e-05
chr9	22600001	22700000	1	1e-05
chr9	25300001	25400000	1	1e-05
chr9	25400001	25500000	1	1e-05
chr9	50000001	50100000	1	1e-05
chr9	50100001	50200000	1	1e-05
chr9	66800001	66900000	1	1e-05
chr9	71600001	71700000	1	1e-05
chr9	73500001	73600000	1	1e-05
chr9	82400001	82500000	1	1e-05
chr9	83000001	83100000	1	1e-05
chrX	18100001	18200000	1	1e-05
chrX	24400001	24500000	1	1e-05
chrX	25900001	26000000	1	1e-05
chrX	32200001	32300000	1	1e-05
chrX	35900001	36000000	1	1e-05
chrX	38400001	38500000	1	1e-05
chrX	54300001	54400000	1	1e-05
chrX	62800001	62900000	1	1e-05
chrX	63400001	63500000	1	1e-05
chrX	63800001	63900000	1	1e-05
chrX	68700001	68800000	1	1e-05
chrX	71600001	71700000	1	1e-05
chrX	75600001	75700000	1	1e-05
chrX	85600001	85700000	1	1e-05
chrX	89100001	89200000	1	1e-05
chrX	94600001	94700000	1	1e-05
chrX	98600001	98700000	1	1e-05
chrX	101200001	101300000	1	1e-05
chrX	102000001	102100000	1	1e-05
chrX	113200001	113300000	1	1e-05
chrX	116000001	116100000	1	1e-05
chrX	127300001	127400000	1	1e-05

## Sheet: ARBgenes
chr1	26800001	26900000	Sh3pxd2a
chr1	26800001	26900000	sh3pxd2aa
chr1	77000001	77100000	Arid4b
chr1	116500001	116600000	CTSH
chr1	157900001	158000000	LOC101927079
chr1	157900001	158000000	Olfr742
chr1	157900001	158000000	Olfr741
chr1	157900001	158000000	Olfr743
chr1	157900001	158000000	Olfr739
chr1	157900001	158000000	Olfr1387
chr1	157900001	158000000	Olr1393
chr1	157900001	158000000	OR11G2
chr1	157900001	158000000	OR11H2
chr10	67600001	67700000	SLC35F1
chr10	82700001	82800000	Pde7b
chr11	27500001	27600000	CA10
chr11	27500001	27600000	Car10
chr11	35100001	35200000	Bcas3
chr11	43800001	43900000	ssh2b
chr11	43800001	43900000	ssh2.L
chr11	43800001	43900000	SSH2
chr12	16800001	16900000	OR4A15
chr12	16800001	16900000	Olfr1233
chr12	16800001	16900000	Olfr1383
chr12	16800001	16900000	Olfr1188
chr12	16800001	16900000	Olfr1392
chr12	16800001	16900000	Olr1397
chr12	16800001	16900000	Olr697
chr12	16800001	16900000	Olr696
chr12	16800001	16900000	Olr1692
chr12	16800001	16900000	Olr1388
chr12	16800001	16900000	OR2Y1
chr14	21500001	21600000	Sgcd
chr14	23900001	24000000	gria1a
chr14	23900001	24000000	GluRIA
chr14	23900001	24000000	GRIA1
chr14	23900001	24000000	gria1b
chr14	24100001	24200000	gria1.L
chr14	27900001	28000000	ABLIM3
chr14	29600001	29700000	DPYSL2
chr14	30100001	30200000	PPP2R2B
chr14	33500001	33600000	Arhgap26
chr14	33500001	33600000	arhgap10
chr14	33500001	33600000	arhgap26.L
chr14	41500001	41600000	Fstl4
chr14	43000001	43100000	Fnip1
chr14	44200001	44300000	Minar2
chr14	52200001	52300000	Prr16
chr15	42900001	43000000	LINC01122
chr15	49800001	49900000	NRXN1
chr15	49800001	49900000	NRXN2
chr15	49800001	49900000	NRXN3
chr15	49800001	49900000	nrxn3a
chr15	49800001	49900000	nrxn1a
chr15	49800001	49900000	nrxn2b
chr15	49800001	49900000	nrxn1b
chr15	49800001	49900000	nrxn2a
chr15	50500001	50600000	nrxn3b
chr15	64600001	64700000	Ltbp1
chr15	64600001	64700000	ltbp1.S
chr15	64600001	64700000	LOC100136170
chr16	56100001	56200000	Rbms3
chr17	14200001	14300000	rg
chr17	14200001	14300000	NBEA
chr17	14200001	14300000	CG15465
chr17	14200001	14300000	sel-2
chr17	14200001	14300000	nbeaa
chr17	24000001	24100000	Lrch1
chr17	40900001	41000000	PCDH9
chr17	40900001	41000000
chr17	43600001	43700000	KLHL1
chr17	43600001	43700000	klhl4
chr17	47000001	47100000	klf12a
chr17	47000001	47100000	klf12b
chr17	47000001	47100000	Klf12
chr17	58400001	58500000	MIR4500HG
chr17	77500001	77600000	col-119
chr18	4000001	4100000	Gm16861
chr18	15000001	15100000	DPP10
chr18	15000001	15100000	dpp10.L
chr18	17300001	17400000	Nckap5
chr19	35100001	35200000	dlg1
chr19	35100001	35200000	dlg1l
chr19	35100001	35200000	dlg2
chr19	45800001	45900000	ZBTB20
chr19	51000001	51100000	ppdpfb
chr2	59400001	59500000	xkr6b
chr2	59400001	59500000	xkr6
chr2	59400001	59500000	zgc:198371
chr2	59400001	59500000	LOC497075
chr2	63900001	64000000	Galntl6
chr2	63900001	64000000	si:ch211-15e22.3
chr2	83800001	83900000	LOC367515
chr2	83800001	83900000	Iqcm
chr2	89800001	89900000	INPP4B
chr20	19900001	20000000	LOC100191823
chr20	19900001	20000000	cdkal1
chr20	19900001	20000000	LOC100114050
chr20	19900001	20000000	CG6550
chr20	19900001	20000000	cdkal
chr20	19900001	20000000	cdkal1.S
chr20	19900001	20000000	F28P5.4;
chr20	19900001	20000000	Y92H12BL.1
chr20	40000001	40100000	kif6
chr21	30500001	30600000	SPEF2
chr22	25700001	25800000	Raly
chr22	36900001	37000000	RPSAP52
chr22	46900001	47000000	Phactr3
chr22	46900001	47000000	phactr3b
chr23	13300001	13400000	Galphaq
chr23	13300001	13400000	CG17760
chr23	13300001	13400000	Gq
chr23	13300001	13400000	gpa-3
chr23	13300001	13400000	CG30054
chr23	13300001	13400000	gna15.1
chr23	13300001	13400000	gna14
chr23	20000001	20100000	Mamdc2
chr23	41800001	41900000	LOC101929563
chr23	45600001	45700000	Lingo2
chr23	49800001	49900000	Ubap2
chr24	36200001	36300000	ITPK1
chr24	36200001	36300000	itpk1a
chr24	36200001	36300000	itpk1.L
chr26	10400001	10500000	ROBO1
chr26	35700001	35800000	Kcnj15
chr26	37400001	37500000	dscama
chr26	37400001	37500000	Dscam
chr27	37100001	37200000	Csmd3
chr27	37100001	37200000	CSMD1
chr28	1300001	1400000	LOC101927356
chr28	7600001	7700000	Syt1
chr28	24600001	24700000	ANKS1B
chr28	36200001	36300000	TMEM184A
chr29	12300001	12400000	GPR158
chr29	13400001	13500000	KIAA1217
chr29	15500001	15600000	Mllt10
chr29	15500001	15600000	mllt10.L
chr29	34100001	34200000	Rac1
chr3	6900001	7000000	FTO
chr3	29400001	29500000	Gan
chr3	46700001	46800000	GRID2
chr3	50300001	50400000	ZNF121
chr3	53000001	53100000	ARHGAP24
chr3	53000001	53100000	LOC100201400
chr3	82300001	82400000	SLAIN2
chr3	82800001	82900000	cnga2a
chr3	109800001	109900000	LOC101929095
chr3	114700001	114800000	LOC101928306
chr3	116900001	117000000	tmem38b
chr3	116900001	117000000	Sorcs2
chr3	120900001	121000000	Gak
chr30	5100001	5200000	Kif26b
chr30	5100001	5200000	KIF26A
chr30	16700001	16800000	Ush2a
chr4	20000001	20100000	Ddc
chr4	35800001	35900000	AKAP9
chr4	50500001	50600000	HDAC9
chr4	54900001	55000000	KLHL7
chr4	54900001	55000000	igf2bp3
chr4	63100001	63200000	avl9
chr4	63100001	63200000	RP9
chr4	63100001	63200000	LOC314140
chr4	63400001	63500000	BBS9
chr4	63400001	63500000	bbs9.L
chr4	70300001	70400000	ZNF277
chr4	88400001	88500000	AKR1C2
chr4	94300001	94400000	TMEM178B
chr4	94300001	94400000	zgc:194665
chr4	94300001	94400000	tmem178.2
chr5	12200001	12300000	ASTN1
chr5	42900001	43000000	PLEKHA5
chr6	2200001	2300000	erbb4a
chr6	2200001	2300000	ERBB4
chr6	2200001	2300000	erbb4.L
chr6	2200001	2300000	erbb3a
chr6	2200001	2300000	erbb3b
chr6	2200001	2300000	LOC100149258
chr6	3300001	3400000	IKZF2
chr6	48600001	48700000	slco1f2
chr6	48600001	48700000	Slco1a5
chr6	48600001	48700000	slco1c1
chr6	48600001	48700000	slco1b3
chr6	48600001	48700000	SLCO1B1
chr6	48600001	48700000	SLCO1A2
chr6	48600001	48700000	slco1d1
chr6	48600001	48700000	slco1f3
chr6	48600001	48700000	slco1f1
chr6	50500001	50600000	Sox5
chr6	50500001	50600000	sox5.S
chr6	50500001	50600000	LOC100136290
chr6	50500001	50600000	sox6b
chr7	23900001	24000000	CADM1
chr7	25500001	25600000	sik3
chr7	25500001	25600000	KP78b
chr7	32300001	32400000	OR10G4
chr7	32300001	32400000	Olfr979
chr7	32300001	32400000	OR8D4
chr7	32300001	32400000	OR10G9
chr7	32300001	32400000	Olr1449
chr7	32700001	32800000	Olfr290
chr7	32700001	32800000	Olfr291
chr7	32700001	32800000	Olr10
chr7	32700001	32800000	Olr11
chr7	32700001	32800000	Olr1631
chr7	33800001	33900000	Olfr145
chr7	33800001	33900000	Olr1201
chr7	33800001	33900000	Olfr924
chr7	33800001	33900000	OR8D2
chr7	33800001	33900000	Olr1396
chr7	67400001	67500000	Tenm4
chr7	75300001	75400000	Olfr670
chr7	75300001	75400000	Olfr677
chr7	75300001	75400000	or51e1
chr7	75300001	75400000	OLFR555
chr7	75300001	75400000	OR52E1
chr7	75300001	75400000	Olr188
chr7	75300001	75400000	Olr86
chr7	75300001	75400000	OR52R1
chr7	75300001	75400000	OR51Q1
chr7	75300001	75400000	Olfr632
chr7	75300001	75400000	OR52E8
chr7	75300001	75400000	OR52N2
chr7	75300001	75400000	OR51M1
chr8	67400001	67500000	SETBP1
chr9	18600001	18700000	Arfgef1
chr9	18600001	18700000	Sec71
chr9	18600001	18700000	TET2
chr9	18600001	18700000	LOC100289495
chr9	18600001	18700000	HAND2
chr9	18600001	18700000	TIGD1
chr9	22600001	22700000	nkain3.S
chr9	22600001	22700000	NKAIN3
chr9	22600001	22700000	nkain4
chr9	22600001	22700000	nkain4.S
chr9	73500001	73600000	Asap1
chr9	73500001	73600000	asap1a
chrX	25900001	26000000	DMD
chrX	35900001	36000000	LINC01771
chrX	68700001	68800000	Chm
chrX	85600001	85700000	LINC00630
chrX	85600001	85700000	ARMCX5-GPRASP2
chrX	85600001	85700000	NXF3
chrX	102000001	102100000	Gria3
chrX	102000001	102100000	gria3a
chrX	102000001	102100000	gria3b
chrX	102000001	102100000	gria3.L

## Sheet: PER
chr1	7000001	7100000	8	8e-05
chr1	12900001	13000000	5	5e-05
chr1	15800001	15900000	8	8e-05
chr1	24400001	24500000	7	7e-05
chr1	27900001	28000000	6	6e-05
chr1	29500001	29600000	6	6e-05
chr1	31600001	31700000	7	7e-05
chr1	32300001	32400000	6	6e-05
chr1	35600001	35700000	4	4e-05
chr1	35700001	35800000	2	2e-05
chr1	36900001	37000000	8	8e-05
chr1	37700001	37800000	8	8e-05
chr1	37800001	37900000	7	7e-05
chr1	39400001	39500000	7	7e-05
chr1	40000001	40100000	3	3e-05
chr1	53300001	53400000	6	6e-05
chr1	61200001	61300000	7	7e-05
chr1	62600001	62700000	8	8e-05
chr1	73700001	73800000	8	8e-05
chr1	116600001	116700000	1	1e-05
chr1	120400001	120500000	8	8e-05
chr1	126900001	127000000	2	2e-05
chr1	142500001	142600000	2	2e-05
chr1	142800001	142900000	1	1e-05
chr1	151700001	151800000	1	1e-05
chr1	151800001	151900000	8	8e-05
chr1	185300001	185400000	8	8e-05
chr10	25500001	25600000	6	6e-05
chr10	26200001	26300000	8	8e-05
chr10	28000001	28100000	8	8e-05
chr10	29500001	29600000	8	8e-05
chr10	34700001	34800000	1	1e-05
chr10	34800001	34900000	2	2e-05
chr10	35300001	35400000	6	6e-05
chr10	37300001	37400000	8	8e-05
chr10	39800001	39900000	2	2e-05
chr10	47400001	47500000	4	4e-05
chr10	51500001	51600000	8	8e-05
chr10	61500001	61600000	8	8e-05
chr11	25000001	25100000	6	6e-05
chr11	25400001	25500000	8	8e-05
chr11	27800001	27900000	1	1e-05
chr11	30200001	30300000	6	6e-05
chr11	30500001	30600000	8	8e-05
chr11	31100001	31200000	6	6e-05
chr11	36200001	36300000	8	8e-05
chr11	49200001	49300000	4	4e-05
chr11	60900001	61000000	7	7e-05
chr12	12300001	12400000	7	7e-05
chr12	16800001	16900000	5	5e-05
chr12	21200001	21300000	7	7e-05
chr12	21400001	21500000	6	6e-05
chr12	22000001	22100000	7	7e-05
chr12	22300001	22400000	6	6e-05
chr13	2800001	2900000	8	8e-05
chr13	28700001	28800000	7	7e-05
chr14	12500001	12600000	8	8e-05
chr14	59100001	59200000	3	3e-05
chr14	59300001	59400000	3	3e-05
chr14	59400001	59500000	8	8e-05
chr14	86500001	86600000	2	2e-05
chr15	9600001	9700000	7	7e-05
chr15	11600001	11700000	8	8e-05
chr15	27700001	27800000	2	2e-05
chr15	31400001	31500000	8	8e-05
chr15	36700001	36800000	7	7e-05
chr15	36800001	36900000	6	6e-05
chr15	37700001	37800000	7	7e-05
chr15	37800001	37900000	8	8e-05
chr15	44300001	44400000	1	1e-05
chr15	54800001	54900000	8	8e-05
chr15	55600001	55700000	6	6e-05
chr15	56200001	56300000	7	7e-05
chr15	57700001	57800000	8	8e-05
chr15	60700001	60800000	8	8e-05
chr15	62900001	63000000	8	8e-05
chr15	64800001	64900000	8	8e-05
chr15	65000001	65100000	6	6e-05
chr15	73400001	73500000	7	7e-05
chr15	92800001	92900000	6	6e-05
chr16	13100001	13200000	6	6e-05
chr16	22400001	22500000	8	8e-05
chr16	23000001	23100000	4	4e-05
chr16	36800001	36900000	6	6e-05
chr16	37700001	37800000	6	6e-05
chr16	46200001	46300000	8	8e-05
chr16	47700001	47800000	8	8e-05
chr17	2900001	3000000	7	7e-05
chr17	18500001	18600000	7	7e-05
chr17	18800001	18900000	5	5e-05
chr17	19300001	19400000	7	7e-05
chr17	22000001	22100000	5	5e-05
chr17	29300001	29400000	8	8e-05
chr18	17300001	17400000	7	7e-05
chr18	18500001	18600000	8	8e-05
chr18	18900001	19000000	8	8e-05
chr18	19200001	19300000	7	7e-05
chr18	20000001	20100000	8	8e-05
chr18	22100001	22200000	6	6e-05
chr18	22300001	22400000	5	5e-05
chr18	22400001	22500000	7	7e-05
chr18	26900001	27000000	6	6e-05
chr18	28300001	28400000	5	5e-05
chr18	29700001	29800000	6	6e-05
chr18	29900001	30000000	8	8e-05
chr18	32900001	33000000	7	7e-05
chr18	33600001	33700000	8	8e-05
chr18	35400001	35500000	8	8e-05
chr18	43600001	43700000	8	8e-05
chr18	44200001	44300000	5	5e-05
chr18	45400001	45500000	7	7e-05
chr18	48200001	48300000	8	8e-05
chr18	53000001	53100000	7	7e-05
chr18	53300001	53400000	5	5e-05
chr18	53600001	53700000	7	7e-05
chr18	54200001	54300000	8	8e-05
chr18	55100001	55200000	5	5e-05
chr18	57600001	57700000	3	3e-05
chr19	1400001	1500000	6	6e-05
chr19	25500001	25600000	7	7e-05
chr19	31500001	31600000	8	8e-05
chr19	37600001	37700000	7	7e-05
chr19	37800001	37900000	6	6e-05
chr19	39600001	39700000	8	8e-05
chr19	42600001	42700000	7	7e-05
chr19	43900001	44000000	6	6e-05
chr19	44000001	44100000	2	2e-05
chr19	46300001	46400000	8	8e-05
chr19	46600001	46700000	5	5e-05
chr2	9100001	9200000	6	6e-05
chr2	31300001	31400000	4	4e-05
chr2	51100001	51200000	6	6e-05
chr2	55900001	56000000	6	6e-05
chr2	96200001	96300000	7	7e-05
chr2	112800001	112900000	2	2e-05
chr20	4300001	4400000	4	4e-05
chr20	6300001	6400000	6	6e-05
chr20	7600001	7700000	1	1e-05
chr20	13400001	13500000	1	1e-05
chr20	21200001	21300000	1	1e-05
chr20	21400001	21500000	2	2e-05
chr20	22400001	22500000	4	4e-05
chr20	48000001	48100000	8	8e-05
chr20	58400001	58500000	7	7e-05
chr21	8500001	8600000	6	6e-05
chr21	23600001	23700000	7	7e-05
chr21	28300001	28400000	8	8e-05
chr21	29600001	29700000	7	7e-05
chr21	35500001	35600000	6	6e-05
chr21	36000001	36100000	6	6e-05
chr21	50500001	50600000	8	8e-05
chr22	3500001	3600000	8	8e-05
chr22	8000001	8100000	7	7e-05
chr22	23900001	24000000	6	6e-05
chr22	24200001	24300000	8	8e-05
chr22	25600001	25700000	7	7e-05
chr22	25700001	25800000	1	1e-05
chr22	42900001	43000000	3	3e-05
chr23	1500001	1600000	8	8e-05
chr23	2300001	2400000	6	6e-05
chr23	3800001	3900000	1	1e-05
chr23	15900001	16000000	6	6e-05
chr23	33600001	33700000	8	8e-05
chr23	33800001	33900000	8	8e-05
chr23	45200001	45300000	2	2e-05
chr25	21300001	21400000	8	8e-05
chr25	21600001	21700000	5	5e-05
chr25	23300001	23400000	7	7e-05
chr25	28300001	28400000	5	5e-05
chr25	34400001	34500000	8	8e-05
chr25	40200001	40300000	4	4e-05
chr26	12800001	12900000	8	8e-05
chr26	24300001	24400000	8	8e-05
chr26	24700001	24800000	8	8e-05
chr26	28700001	28800000	5	5e-05
chr26	28800001	28900000	5	5e-05
chr26	40600001	40700000	8	8e-05
chr27	35400001	35500000	6	6e-05
chr27	35500001	35600000	8	8e-05
chr28	700001	800000	1	1e-05
chr28	1100001	1200000	5	5e-05
chr28	7300001	7400000	2	2e-05
chr28	7400001	7500000	5	5e-05
chr28	11900001	12000000	8	8e-05
chr28	36000001	36100000	7	7e-05
chr29	11500001	11600000	7	7e-05
chr3	4800001	4900000	8	8e-05
chr3	4900001	5000000	3	3e-05
chr3	8000001	8100000	8	8e-05
chr3	8900001	9000000	8	8e-05
chr3	9800001	9900000	8	8e-05
chr3	12000001	12100000	5	5e-05
chr3	12700001	12800000	3	3e-05
chr3	13600001	13700000	5	5e-05
chr3	15000001	15100000	6	6e-05
chr3	16000001	16100000	8	8e-05
chr3	16400001	16500000	8	8e-05
chr3	16900001	17000000	7	7e-05
chr3	18900001	19000000	8	8e-05
chr3	19400001	19500000	8	8e-05
chr3	19600001	19700000	8	8e-05
chr3	19900001	20000000	8	8e-05
chr3	20600001	20700000	8	8e-05
chr3	20800001	20900000	6	6e-05
chr3	21100001	21200000	7	7e-05
chr3	34700001	34800000	8	8e-05
chr3	36500001	36600000	8	8e-05
chr3	46700001	46800000	2	2e-05
chr3	51900001	52000000	8	8e-05
chr3	54000001	54100000	6	6e-05
chr3	59700001	59800000	4	4e-05
chr3	82100001	82200000	7	7e-05
chr3	92300001	92400000	2	2e-05
chr30	11100001	11200000	8	8e-05
chr30	14700001	14800000	6	6e-05
chr30	25300001	25400000	4	4e-05
chr30	29600001	29700000	5	5e-05
chr31	6900001	7000000	8	8e-05
chr31	26000001	26100000	3	3e-05
chr4	43800001	43900000	5	5e-05
chr4	63100001	63200000	4	4e-05
chr4	86600001	86700000	8	8e-05
chr4	88000001	88100000	8	8e-05
chr4	100600001	100700000	3	3e-05
chr5	23200001	23300000	4	4e-05
chr5	23300001	23400000	7	7e-05
chr5	24900001	25000000	8	8e-05
chr5	42300001	42400000	7	7e-05
chr5	42500001	42600000	7	7e-05
chr5	42600001	42700000	7	7e-05
chr5	43700001	43800000	8	8e-05
chr5	46500001	46600000	8	8e-05
chr5	47300001	47400000	7	7e-05
chr5	48500001	48600000	8	8e-05
chr5	50300001	50400000	7	7e-05
chr5	50600001	50700000	7	7e-05
chr5	50800001	50900000	7	7e-05
chr5	54300001	54400000	7	7e-05
chr5	55200001	55300000	4	4e-05
chr5	55300001	55400000	7	7e-05
chr5	55400001	55500000	4	4e-05
chr5	57500001	57600000	7	7e-05
chr5	66700001	66800000	6	6e-05
chr5	67500001	67600000	6	6e-05
chr5	68300001	68400000	8	8e-05
chr5	69000001	69100000	7	7e-05
chr5	69200001	69300000	7	7e-05
chr5	95100001	95200000	8	8e-05
chr6	3200001	3300000	1	1e-05
chr6	13700001	13800000	2	2e-05
chr6	27100001	27200000	8	8e-05
chr6	37200001	37300000	8	8e-05
chr6	50300001	50400000	8	8e-05
chr6	51300001	51400000	8	8e-05
chr6	54800001	54900000	5	5e-05
chr6	73000001	73100000	3	3e-05
chr6	77800001	77900000	8	8e-05
chr6	79200001	79300000	2	2e-05
chr6	79300001	79400000	5	5e-05
chr7	24200001	24300000	7	7e-05
chr7	30800001	30900000	4	4e-05
chr7	30900001	31000000	5	5e-05
chr7	34700001	34800000	5	5e-05
chr7	37800001	37900000	8	8e-05
chr7	40800001	40900000	7	7e-05
chr7	41700001	41800000	8	8e-05
chr7	43300001	43400000	8	8e-05
chr7	47800001	47900000	6	6e-05
chr7	52400001	52500000	5	5e-05
chr7	57800001	57900000	8	8e-05
chr7	64100001	64200000	8	8e-05
chr7	64500001	64600000	8	8e-05
chr7	65000001	65100000	8	8e-05
chr7	65700001	65800000	6	6e-05
chr7	65800001	65900000	8	8e-05
chr7	66000001	66100000	8	8e-05
chr7	90700001	90800000	1	1e-05
chr8	8400001	8500000	6	6e-05
chr8	9200001	9300000	3	3e-05
chr8	29300001	29400000	3	3e-05
chr8	35800001	35900000	7	7e-05
chr8	39000001	39100000	8	8e-05
chr8	55200001	55300000	7	7e-05
chr8	95000001	95100000	8	8e-05
chr9	4900001	5000000	6	6e-05
chr9	7800001	7900000	3	3e-05
chr9	7900001	8000000	1	1e-05
chr9	17000001	17100000	1	1e-05
chr9	19800001	19900000	8	8e-05
chr9	22900001	23000000	8	8e-05
chr9	65800001	65900000	4	4e-05
chr9	77400001	77500000	8	8e-05

## Sheet: PERgenes
chr1	7000001	7100000	ADAM12
chr1	7000001	7100000	Adam12
chr1	40000001	40100000	Lipk
chr1	40000001	40100000	lipl-1
chr1	40000001	40100000	Lipo4
chr1	40000001	40100000	lipl-2
chr1	62600001	62700000	LOC107843100
chr1	62600001	62700000	ADK
chr1	62600001	62700000	adk.S
chr1	62600001	62700000	LOC107891140
chr1	62600001	62700000	LOC107790330
chr1	62600001	62700000	LOC100196663
chr1	62600001	62700000	LOC107806529
chr1	62600001	62700000	LOC100780391
chr1	62600001	62700000	ADK1
chr1	62600001	62700000	LOC102577684
chr1	62600001	62700000	adka
chr1	62600001	62700000	LOC541999
chr1	62600001	62700000	adkb
chr1	62600001	62700000	LOC100801737
chr1	142800001	142900000	MYEF2
chr1	142800001	142900000	slc24a4a
chr1	142800001	142900000	dut.L
chr1	142800001	142900000	DUT
chr1	142800001	142900000	SLC12A1
chr1	142800001	142900000	dut-1
chr1	151700001	151800000	LOC100289495
chr1	151700001	151800000	TIGD1
chr1	151700001	151800000	COA1
chr1	151700001	151800000	NR3C2
chr1	151700001	151800000	ASPA
chr1	151700001	151800000	MIA2
chr1	151700001	151800000	ZNF621
chr1	151800001	151900000	LOC100289495
chr1	151800001	151900000	TIGD1
chr1	151800001	151900000	COA1
chr1	151800001	151900000	NR3C2
chr1	151800001	151900000	ASPA
chr1	151800001	151900000	MIA2
chr1	151800001	151900000	ZNF621
chr10	25500001	25600000	zgc:194336
chr10	26200001	26300000	ZSCAN5C
chr10	26200001	26300000	Zfp11
chr10	26200001	26300000	ZNF823
chr10	26200001	26300000	znf208.L
chr10	26200001	26300000	Zfp790
chr10	26200001	26300000	Gm13212
chr10	26200001	26300000	Zfp334
chr10	26200001	26300000	Zfp942
chr10	26200001	26300000	Zfp945
chr10	26200001	26300000	Zfp40
chr10	26200001	26300000	znf983
chr10	26200001	26300000	Zfp715
chr10	26200001	26300000	Rex2
chr10	26200001	26300000	Zfp820
chr10	26200001	26300000	znf33b
chr10	26200001	26300000	Zfp1
chr10	26200001	26300000	ZNF337
chr10	26200001	26300000	ZNF257
chr10	26200001	26300000	ZNF320
chr10	26200001	26300000	Prdm9
chr10	26200001	26300000	ZNF251
chr10	26200001	26300000	Zfp7
chr10	26200001	26300000	ZNF594
chr10	26200001	26300000	LOC100135213
chr10	26200001	26300000	Zfp322a
chr10	26200001	26300000	Zfp354c
chr10	26200001	26300000	ZNF542P
chr10	26200001	26300000	zgc:174288
chr10	28000001	28100000	znf585b.S
chr10	28000001	28100000	zgc:174710
chr10	28000001	28100000	Zfp747
chr10	28000001	28100000	ZNF552
chr10	28000001	28100000	9130019O22Rik
chr10	28000001	28100000	znf1147
chr10	28000001	28100000	znf971
chr10	28000001	28100000	znf989
chr10	28000001	28100000	znf1070
chr10	28000001	28100000	znf1161
chr10	28000001	28100000	ORYCUNV1R1556
chr10	28000001	28100000	si:ch73-138e16.2
chr10	28000001	28100000	znf1051
chr10	28000001	28100000	ZNF833P
chr10	28000001	28100000	prdm9.L
chr10	28000001	28100000	znf585b
chr10	28000001	28100000	prdm9
chr10	28000001	28100000	zgc:165514
chr10	28000001	28100000	znf983
chr10	28000001	28100000	2810047C21Rik1
chr10	28000001	28100000	LOC421232
chr10	28000001	28100000	zgc:174314
chr10	28000001	28100000	zgc:163077
chr10	28000001	28100000	LOC100127788
chr10	28000001	28100000	zgc:66483
chr10	28000001	28100000	LOC100191026
chr10	28000001	28100000	ZNF302
chr10	28000001	28100000	ZNF544
chr10	28000001	28100000	zgc:112998
chr10	28000001	28100000	ZNF587B
chr10	28000001	28100000	zgc:113518
chr10	28000001	28100000	si:ch211-222k6.1
chr10	28000001	28100000	ZNF442
chr10	28000001	28100000	ZNF548
chr10	28000001	28100000	zf(c2h2)-19
chr10	28000001	28100000	Zfp445
chr10	28000001	28100000	zgc:162962
chr10	28000001	28100000	ZNF530
chr10	28000001	28100000	ZNF419
chr10	28000001	28100000	znf208.L
chr10	28000001	28100000	ZNF549
chr10	28000001	28100000	LOC655535
chr10	28000001	28100000	znf865
chr10	28000001	28100000	znf214
chr10	28000001	28100000	zgc:113209
chr10	28000001	28100000	Zfp719
chr10	28000001	28100000	Zfp658
chr10	28000001	28100000	ZNF584
chr10	28000001	28100000	LOC100301958
chr10	28000001	28100000	Zfp616
chr10	28000001	28100000	znf71.L
chr10	28000001	28100000	ZNF749
chr10	28000001	28100000	Zfp715
chr10	28000001	28100000	znf180
chr10	28000001	28100000	zgc:171220
chr10	28000001	28100000	znf333
chr10	28000001	28100000	si:ch73-299h12.6
chr10	28000001	28100000	znf526
chr10	28000001	28100000	ZNF134
chr10	28000001	28100000	Zfp433
chr10	28000001	28100000	zgc:113119
chr10	28000001	28100000	znf484.L
chr10	28000001	28100000	Zfp772
chr10	28000001	28100000	znf519
chr10	28000001	28100000	zgc:174650
chr10	28000001	28100000	Zfp954
chr10	28000001	28100000	znf668.L
chr10	28000001	28100000	zgc:174315
chr10	28000001	28100000	LOC100189617
chr10	28000001	28100000	znf1068
chr10	28000001	28100000	zgc:162971
chr10	28000001	28100000	zgc:174704
chr10	28000001	28100000	zgc:174690
chr10	28000001	28100000	zgc:174703
chr10	28000001	28100000	zgc:113343
chr10	28000001	28100000	znf568.L
chr10	28000001	28100000	zgc:173486
chr10	28000001	28100000	zgc:113348
chr10	28000001	28100000	zgc:173714
chr10	28000001	28100000	znf1041
chr10	28000001	28100000	ZNF304
chr10	28000001	28100000	Zfp473
chr10	28000001	28100000	ZNF443
chr10	28000001	28100000	ZNF587
chr10	28000001	28100000	Zfp426
chr10	28000001	28100000	ZIK1
chr10	28000001	28100000	ZNF557
chr10	28000001	28100000	Zfp819
chr10	28000001	28100000	znf84-like
chr10	28000001	28100000	ZNF417
chr10	28000001	28100000	zgc:174696
chr10	28000001	28100000	ZNF586
chr10	28000001	28100000	zgc:174890
chr10	28000001	28100000	ZNF16
chr10	28000001	28100000	Zfp7
chr10	28000001	28100000	Zfp971
chr10	28000001	28100000	zf(c2h2)-14
chr10	28000001	28100000	ZNF551
chr10	28000001	28100000	ZNF460
chr10	28000001	28100000	ZNF786
chr10	28000001	28100000	ZNF594
chr10	28000001	28100000	zgc:175107
chr10	28000001	28100000	Zfp961
chr10	28000001	28100000	LOC512684
chr10	28000001	28100000	znf990
chr10	28000001	28100000	ZNF792
chr10	28000001	28100000	LOC100216020
chr10	28000001	28100000	ZNF17
chr10	28000001	28100000	si:rp71-1h20.5
chr10	28000001	28100000	znf668
chr10	28000001	28100000	Zfp978
chr10	28000001	28100000	zgc:112977
chr10	28000001	28100000	BZFP1
chr10	28000001	28100000	LOC110437714
chr10	28000001	28100000	ZNF252
chr10	39800001	39900000	snx14
chr10	39800001	39900000	snx14.L
chr11	31100001	31200000	Ankfn1
chr11	60900001	61000000	AGOS_ADR037W
chr12	12300001	12400000	PTPRJ
chr12	16800001	16900000	OR4A15
chr12	16800001	16900000	Olfr1233
chr12	16800001	16900000	Olfr1383
chr12	16800001	16900000	Olfr1188
chr12	16800001	16900000	Olfr1392
chr12	16800001	16900000	Olr1397
chr12	16800001	16900000	Olr697
chr12	16800001	16900000	Olr696
chr12	16800001	16900000	Olr1692
chr12	16800001	16900000	Olr1388
chr12	16800001	16900000	OR2Y1
chr12	21400001	21500000	OR1C1
chr12	22000001	22100000	OLFR4
chr12	22000001	22100000	Olfr70
chr12	22000001	22100000	Olfr1461
chr12	22000001	22100000	Olfr1446
chr12	22000001	22100000	Olfr1447
chr12	22000001	22100000	Olfr1465
chr12	22000001	22100000	Olr16
chr12	22000001	22100000	Olr361
chr12	22300001	22400000	OR7D2
chr13	2800001	2900000	SDK1
chr14	12500001	12600000	Tenm3
chr14	12500001	12600000	TENM2
chr14	12500001	12600000	TENM4
chr14	59100001	59200000	EPB41L4A
chr14	59100001	59200000	epb41l4a.S
chr14	59100001	59200000	e41l4
chr14	86500001	86600000	HOMER1
chr15	9600001	9700000	Aff3
chr15	11600001	11700000	Tmem131
chr15	31400001	31500000	EXOC6B
chr15	56200001	56300000	THADA
chr15	65000001	65100000	TTC27
chr16	23000001	23100000	TAFA1
chr16	36800001	36900000	Stab1
chr16	36800001	36900000	Nt5dc3
chr16	36800001	36900000	PPM1M
chr17	22000001	22100000	CYSLTR2
chr18	17300001	17400000	Nckap5
chr18	19200001	19300000	LINC01562
chr18	19200001	19300000	ZNF621
chr18	33600001	33700000	Rif1
chr18	53600001	53700000	CHN1
chr18	57600001	57700000	ZNF385B
chr18	57600001	57700000	Zfp385b
chr19	37600001	37700000	TRIO
chr19	37600001	37700000	trioa
chr19	37600001	37700000	KALRN
chr19	37600001	37700000	kalrnb
chr19	37800001	37900000	TRIO
chr19	37800001	37900000	KALRN
chr19	37800001	37900000	trioa
chr19	37800001	37900000	kalrnb
chr19	39600001	39700000	Dtx3
chr19	42600001	42700000	BOK-AS1
chr19	46300001	46400000	ZBTB20
chr2	9100001	9200000	AGBL4
chr20	6300001	6400000	PheRS-m
chr20	6300001	6400000	FARS2
chr20	21400001	21500000	HDGF
chr20	21400001	21500000	HDGFL1
chr20	58400001	58500000	EYS
chr22	25700001	25800000	Raly
chr23	2300001	2400000	C8H9orf3
chr23	2300001	2400000	AOPEP
chr23	2300001	2400000	Npepo
chr25	21300001	21400000	pappaa
chr25	21300001	21400000	Astn1
chr25	21600001	21700000	ASTN2
chr25	21600001	21700000	Astn1
chr25	28300001	28400000	DENND1A
chr25	28300001	28400000	dennd1a.S
chr26	12800001	12900000	Robo2
chr26	24300001	24400000	APP
chr26	24300001	24400000	aplp2
chr26	24300001	24400000	appb
chr26	24300001	24400000	app.L
chr26	24300001	24400000	app.S
chr26	24300001	24400000	aplp2.S
chr26	24300001	24400000	appa
chr26	28700001	28800000	KRTAP20-2
chr26	28700001	28800000	Krtap6-2
chr26	28700001	28800000	KRTAP6-1
chr26	28700001	28800000	Gm10229
chr26	28700001	28800000	Gm10228
chr26	28700001	28800000	1110025L11Rik
chr26	28700001	28800000	Krtap6-5
chr26	28700001	28800000	KRTAP21-1
chr26	28700001	28800000	KRTAP6-3
chr26	28700001	28800000	Krtap16-3
chr26	28700001	28800000	Krtap19-1
chr26	28700001	28800000	Krtap19-5
chr26	28700001	28800000	KAP6.1.1
chr26	28700001	28800000	Gm9789
chr26	28700001	28800000	KRTAP19-6
chr26	28700001	28800000	Krtap19-4
chr26	28700001	28800000	Krtap19-2
chr26	28700001	28800000	Krtap19-9b
chr26	28800001	28900000	KRTAP20-2
chr26	28800001	28900000	Krtap6-2
chr26	28800001	28900000	KRTAP21-1
chr28	7400001	7500000	Syt1
chr28	36000001	36100000	Triobp
chr3	8900001	9000000	CES5A
chr3	8900001	9000000	LOC100736962
chr3	8900001	9000000	CES4A
chr3	8900001	9000000	Ces2a
chr3	8900001	9000000	Ces3a
chr3	8900001	9000000	Ces1e
chr3	8900001	9000000	Ces3b
chr3	8900001	9000000	LOC101790670
chr3	8900001	9000000	Ces2h
chr3	8900001	9000000	LOC750069
chr3	8900001	9000000	Ces2j
chr3	8900001	9000000	CES3
chr3	8900001	9000000	LOC291863
chr3	8900001	9000000	LOC100365112
chr3	8900001	9000000	Ces2
chr3	8900001	9000000	Ces2e
chr3	8900001	9000000	LOC679149
chr3	8900001	9000000	Ces1c
chr3	8900001	9000000	LOC100009551
chr3	8900001	9000000	Ces1h
chr3	12000001	12100000	KRBOX4
chr3	36500001	36600000	ANKRD11
chr3	36500001	36600000	cdk11b.S
chr3	46700001	46800000	GRID2
chr3	54000001	54100000	Wdfy3
chr3	59700001	59800000	Fras1
chr3	82100001	82200000	FRYL
chr30	11100001	11200000	MARK1
chr30	11100001	11200000	mark1.S
chr30	11100001	11200000	mark2.L
chr30	14700001	14800000	CG13560
chr30	14700001	14800000	TGFB2
chr30	14700001	14800000	tgfb1b
chr30	14700001	14800000	RRP15
chr31	6900001	7000000	Prkn
chr4	63100001	63200000	avl9
chr4	63100001	63200000	RP9
chr4	63100001	63200000	LOC314140
chr4	86600001	86700000	PLXNA4
chr4	86600001	86700000	plxna1b
chr4	86600001	86700000	LOC495321
chr4	86600001	86700000	plxna2
chr4	88000001	88100000	EXOC4
chr4	100600001	100700000	cntnap2b
chr4	100600001	100700000	cntnap2
chr4	100600001	100700000	cntnap2a
chr5	24900001	25000000	HHAT
chr5	46500001	46600000	HAO2
chr5	55200001	55300000	GNAS
chr5	68300001	68400000	Fnbp1l
chr5	68300001	68400000	fnbp1l.S
chr5	68300001	68400000	fnbp1l.L
chr5	69000001	69100000	EVI5
chr5	95100001	95200000	PATJ
chr6	3200001	3300000	IKZF2
chr6	27100001	27200000	RTP5
chr6	37200001	37300000	MGC82112
chr6	37200001	37300000	OVST
chr6	37200001	37300000	PZP
chr6	37200001	37300000	pzp.L
chr6	37200001	37300000	a2ml1.L
chr6	37200001	37300000	MGC68875
chr6	73000001	73100000	Olfr305
chr6	73000001	73100000	Olr29
chr6	73000001	73100000	Olfr223
chr6	73000001	73100000	Olfr294
chr6	73000001	73100000	Olr1431
chr6	73000001	73100000	or11l1.L
chr6	73000001	73100000	Olr1029
chr6	73000001	73100000	Olr10
chr6	79300001	79400000	Tafa2
chr7	30800001	30900000	JHY
chr7	30800001	30900000	Crtam
chr7	30800001	30900000	ubash3bb
chr7	30800001	30900000	hsc70
chr7	30800001	30900000	UBASH3B
chr7	30900001	31000000	JHY
chr7	30900001	31000000	Crtam
chr7	30900001	31000000	Hsp70
chr7	30900001	31000000	bsx
chr7	30900001	31000000	hsc70.ii
chr7	34700001	34800000	PKNOX2
chr7	40800001	40900000	Ntm
chr7	41700001	41800000	Iglon5
chr7	47800001	47900000	ZNF333
chr7	47800001	47900000	ZNF121
chr7	47800001	47900000	Zfp709
chr7	47800001	47900000	Zfp870
chr7	47800001	47900000	ZNF778
chr7	47800001	47900000	zgc:175284
chr7	47800001	47900000	Zfp811
chr7	47800001	47900000	ZNF66
chr7	47800001	47900000	ZNF114
chr7	47800001	47900000	A430033K04Rik
chr7	47800001	47900000	ZNF433
chr7	47800001	47900000	ZNF560
chr7	47800001	47900000	Zfp709l1
chr7	47800001	47900000	BC052688
chr7	47800001	47900000	Gm21814
chr7	47800001	47900000	Zfp799
chr7	47800001	47900000	2410141K09Rik
chr7	47800001	47900000	zgc:173816
chr7	47800001	47900000	Zfp788
chr7	47800001	47900000	Fbxl12os
chr7	47800001	47900000	EU599041
chr7	47800001	47900000	znf33a.L
chr7	47800001	47900000	znf1162
chr7	47800001	47900000	zgc:174224
chr7	47800001	47900000	znf350
chr7	47800001	47900000	znf585b.S
chr7	47800001	47900000	Zfp967
chr7	47800001	47900000	Zfp966
chr7	47800001	47900000	zf(c2h2)-8
chr7	47800001	47900000	zgc:113030
chr7	47800001	47900000	blf
chr7	47800001	47900000	ZNF441
chr7	47800001	47900000	ZNF195
chr7	47800001	47900000	ZNF100
chr7	47800001	47900000	ZNF136
chr7	47800001	47900000	ZNF682
chr7	47800001	47900000	znf1177
chr7	47800001	47900000	Zfp37
chr7	47800001	47900000	Zfp119b
chr7	47800001	47900000	zf(c2h2)-14
chr7	47800001	47900000	ZNF302
chr7	47800001	47900000	ZNF101
chr7	47800001	47900000	ZNF763
chr7	47800001	47900000	Zfp791
chr7	47800001	47900000	ZNF717
chr7	47800001	47900000	ZNF426
chr7	47800001	47900000	ZNF91
chr7	47800001	47900000	ZNF823
chr7	47800001	47900000	LOC100301947
chr7	47800001	47900000	Gm14434
chr7	47800001	47900000	ZNF799
chr7	47800001	47900000	Kr-h1
chr7	47800001	47900000	5730507C01Rik
chr7	47800001	47900000	ZNF439
chr7	47800001	47900000	ZNF440
chr7	47800001	47900000	ZNF33A
chr7	47800001	47900000	Zfp882
chr7	47800001	47900000	Gm14322
chr7	47800001	47900000	ZNF181
chr7	47800001	47900000	ZNF69
chr7	47800001	47900000	ZNF430
chr7	47800001	47900000	ZNF878
chr7	47800001	47900000	ZNF788P
chr7	47800001	47900000	Zfp932
chr7	47800001	47900000	ZNF99
chr7	47800001	47900000	Gm45871
chr7	47800001	47900000	Zfp959
chr7	47800001	47900000	Zfp472
chr7	47800001	47900000	Zfp955a
chr7	47800001	47900000	ZNF283
chr7	47800001	47900000	Zfp426
chr7	47800001	47900000	Gm14391
chr7	47800001	47900000	ZNF669
chr7	47800001	47900000	AI987944
chr7	47800001	47900000	ZNF700
chr7	47800001	47900000	ZNF90
chr7	47800001	47900000	Zfp81
chr7	47800001	47900000	Zfp869
chr7	47800001	47900000	ZNF266
chr7	47800001	47900000	ZNF562
chr7	47800001	47900000	ZNF429
chr7	47800001	47900000	ZNF594
chr7	47800001	47900000	Zfp935
chr7	47800001	47900000	ZNF555
chr7	47800001	47900000	ZNF670
chr7	47800001	47900000	ZNF718
chr7	47800001	47900000	ZNF627
chr7	47800001	47900000	ZNF709
chr7	47800001	47900000	ZNF443
chr7	47800001	47900000	Zfp180
chr7	47800001	47900000	AU041133
chr7	47800001	47900000	Zfp955b
chr7	47800001	47900000	Zfp763
chr7	47800001	47900000	ZNF559
chr7	47800001	47900000	Zfp971
chr7	47800001	47900000	ZNF534
chr7	47800001	47900000	ZNF716
chr7	47800001	47900000	ZNF20
chr7	47800001	47900000	ZNF791
chr7	47800001	47900000	Zfp965
chr7	47800001	47900000	znf1041
chr7	47800001	47900000	Zfp626
chr7	47800001	47900000	Zfp120
chr7	47800001	47900000	ZNF92
chr7	47800001	47900000	ZNF491
chr7	47800001	47900000	ZNF442
chr7	47800001	47900000	Zfp59
chr7	47800001	47900000	zgc:173726
chr7	47800001	47900000	ZNF844
chr7	47800001	47900000	ZNF44
chr7	47800001	47900000	Zfp952
chr7	47800001	47900000	ZNF146
chr7	47800001	47900000	ZNF28
chr7	47800001	47900000	ZNF490
chr7	47800001	47900000	Gm2026
chr7	47800001	47900000	ZNF568
chr7	47800001	47900000	Zfp39
chr7	47800001	47900000	ZNF625-ZNF20
chr7	47800001	47900000	Zfp617
chr7	47800001	47900000	Zfp873
chr7	47800001	47900000	Zfp347
chr7	47800001	47900000	Zfp458
chr7	47800001	47900000	Zfp112
chr7	47800001	47900000	Gm3055
chr7	47800001	47900000	Zfp951
chr7	47800001	47900000	6720489N17Rik
chr7	47800001	47900000	Zfp960
chr7	47800001	47900000	Zfp97
chr7	47800001	47900000	Gm20939
chr7	47800001	47900000	Zfp563
chr7	47800001	47900000	Gm6712
chr7	47800001	47900000	Zfp738
chr7	47800001	47900000	Zfp937
chr7	47800001	47900000	Zfp970
chr7	47800001	47900000	Zfp345
chr7	47800001	47900000	Zfp945
chr7	47800001	47900000	Zfp950
chr7	47800001	47900000	ZNF833P
chr7	47800001	47900000	Gm2381
chr7	47800001	47900000	znf268.S
chr7	47800001	47900000	znf983
chr7	47800001	47900000	LOC100337651
chr7	47800001	47900000	Gm14296
chr7	47800001	47900000	Gm14393
chr7	47800001	47900000	Gm10324
chr7	47800001	47900000	Zfp973
chr7	47800001	47900000	LOC102640673
chr7	47800001	47900000	Zfp964
chr7	47800001	47900000	Zfp33b
chr7	47800001	47900000	Gm6710
chr7	47800001	47900000	Gm32856
chr7	47800001	47900000	Zfp977
chr7	47800001	47900000	Zfp934
chr7	47800001	47900000	Gm3604
chr7	47800001	47900000	D130040H23Rik
chr7	47800001	47900000	Gm14440
chr7	47800001	47900000	Zfp433
chr7	47800001	47900000	LOC100124497
chr7	47800001	47900000	znf208
chr7	47800001	47900000	Zfp953
chr7	47800001	47900000	Zfp825
chr7	47800001	47900000	Zfp975
chr7	47800001	47900000	Gm5141
chr7	47800001	47900000	2010315B03Rik
chr7	47800001	47900000	Gm14124
chr7	47800001	47900000	Gm14405
chr7	47800001	47900000	Zfp874a
chr7	47800001	47900000	Zfp933
chr7	47800001	47900000	Zfp931
chr7	47800001	47900000	LOC100125368
chr7	47800001	47900000	znf665
chr7	47800001	47900000	Gm38396
chr7	47800001	47900000	Gm14308
chr7	47800001	47900000	Gm14430
chr7	47800001	47900000	Gm4724
chr7	47800001	47900000	Gm14139
chr7	47800001	47900000	Zfp963
chr7	47800001	47900000	Gm14326
chr7	47800001	47900000	Gm14305
chr7	47800001	47900000	Zfp619
chr7	47800001	47900000	Zfp808
chr7	47800001	47900000	zgc:172128
chr7	47800001	47900000	znf484.L
chr7	47800001	47900000	B230307C23Rik
chr7	47800001	47900000	Zfp958
chr7	47800001	47900000	Zfp976
chr7	47800001	47900000	znf1068
chr7	47800001	47900000	zgc:136308
chr7	47800001	47900000	Zfp872
chr7	47800001	47900000	RGD1566325
chr7	47800001	47900000	OTTMUSG00000016609
chr7	47800001	47900000	zgc:174315
chr7	47800001	47900000	2210418O10Rik
chr7	47800001	47900000	ZNF107
chr7	47800001	47900000	Zfp961
chr7	47800001	47900000	ZNF124
chr7	47800001	47900000	Zfp119a
chr7	47800001	47900000	AW146154
chr7	47800001	47900000	ZNF721
chr7	47800001	47900000	ZNF486
chr7	47800001	47900000	ZNF556
chr7	47800001	47900000	ZNF761
chr7	47800001	47900000	zgc:162958
chr7	47800001	47900000	ZNF563
chr7	47800001	47900000	Gm14325
chr7	47800001	47900000	ZNF493
chr7	47800001	47900000	Zfp930
chr7	47800001	47900000	zgc:113220
chr7	47800001	47900000	ZNF738
chr7	47800001	47900000	Zfp781
chr7	47800001	47900000	Gm10033
chr7	47800001	47900000	Gm14403
chr7	47800001	47900000	Zfp936
chr7	47800001	47900000	ZNF317
chr7	47800001	47900000	ZNF14
chr7	47800001	47900000	ZNF676
chr7	52400001	52500000	ZNF559
chr7	52400001	52500000	Y55F3AM.14
chr7	52400001	52500000	ZNF773
chr7	52400001	52500000	ZNF302
chr7	52400001	52500000	ZNF121
chr7	52400001	52500000	ZNF846
chr7	52400001	52500000	ZNF43
chr7	52400001	52500000	znf1041
chr7	52400001	52500000	ZNF114
chr7	52400001	52500000	Zfp266
chr7	52400001	52500000	Olfr291
chr7	52400001	52500000	ZNF562
chr7	52400001	52500000	ZNF525
chr7	52400001	52500000	ZNF429
chr7	52400001	52500000	ZNF557
chr7	52400001	52500000	Olr1867
chr7	52400001	52500000	Zfp426
chr7	52400001	52500000	ZNF266
chr7	52400001	52500000	ZNF333
chr7	52400001	52500000	ZNF426
chr7	52400001	52500000	ZNF761
chr7	52400001	52500000	ZNF560
chr7	52400001	52500000	ZNF561
chr7	52400001	52500000	si:ch211-161m3.6
chr7	52400001	52500000	ZNF570
chr7	52400001	52500000	Zfp26
chr7	52400001	52500000	Zfp473
chr7	52400001	52500000	Zfp94
chr7	52400001	52500000	ZNF331
chr7	52400001	52500000	ZNF85
chr7	52400001	52500000	ZNF782
chr7	52400001	52500000	ZNF708
chr7	52400001	52500000	ZNF534
chr7	52400001	52500000	ZNF267
chr7	52400001	52500000	ZNF778
chr7	52400001	52500000	ZNF493
chr7	52400001	52500000	ZFP14
chr7	52400001	52500000	Zfp287
chr7	52400001	52500000	znf214
chr7	52400001	52500000	ZNF812P
chr7	52400001	52500000	Zfp429
chr7	52400001	52500000	zgc:174650
chr7	52400001	52500000	LOC100150619
chr7	52400001	52500000	Rslcan18
chr7	52400001	52500000	LOC441666
chr7	52400001	52500000	Zfp273
chr7	52400001	52500000	znf268.S
chr7	52400001	52500000	Fbxl12os
chr7	52400001	52500000	zgc:113209
chr7	52400001	52500000	zgc:113119
chr7	52400001	52500000	znf568
chr7	52400001	52500000	ZNF876P
chr7	52400001	52500000	ZNF177
chr7	52400001	52500000	Zfp846
chr7	52400001	52500000	LOC682870
chr7	52400001	52500000	Zfp735
chr7	52400001	52500000	znf983
chr7	52400001	52500000	Zfp65
chr7	52400001	52500000	znf1069
chr7	52400001	52500000	Zfp560
chr7	52400001	52500000	zgc:174653
chr7	52400001	52500000	zgc:171551
chr7	52400001	52500000	znf971
chr7	52400001	52500000	zgc:172128
chr7	52400001	52500000	si:dkey-57k17.1
chr7	52400001	52500000	znf1119
chr7	52400001	52500000	zgc:165514
chr7	52400001	52500000	ZNF345
chr7	52400001	52500000	ZNF737
chr7	52400001	52500000	ZNF84
chr7	52400001	52500000	ZNF728
chr7	52400001	52500000	Zfp819
chr7	52400001	52500000	Olr1159
chr7	52400001	52500000	Olr1393
chr7	52400001	52500000	znf1157
chr7	52400001	52500000	zf(c2h2)-13
chr7	52400001	52500000	zgc:113220
chr7	52400001	52500000	si:dkeyp-53d3.6
chr7	52400001	52500000	ZNF28
chr7	52400001	52500000	ZNF776
chr7	90700001	90800000	NELL1
chr7	90700001	90800000	nell1.S
chr7	90700001	90800000	nell1.L
chr7	90700001	90800000	nell2b
chr8	8400001	8500000	SLC35E4
chr8	35800001	35900000	KLHL7-DT
chr8	35800001	35900000	Ptprm
chr9	7800001	7900000	Tpd52
chr9	7800001	7900000	tpd52.L
chr9	7800001	7900000	tpd52.S
chr9	7800001	7900000	LINC01925
chr9	7900001	8000000	stmn1
chr9	22900001	23000000	Nkain3
chr9	22900001	23000000	nkain4
chr9	22900001	23000000	zgc:100920
chr9	22900001	23000000	nkain4.S

## Sheet: CH
chr1	7000001	7100000	10	0.0001
chr1	35700001	35800000	16	0.00016
chr1	40000001	40100000	13	0.00013
chr1	40100001	40200000	12	0.00012
chr1	40200001	40300000	13	0.00013
chr1	40400001	40500000	17	0.00017
chr1	73700001	73800000	12	0.00012
chr1	74100001	74200000	6	6e-05
chr1	116600001	116700000	1	1e-05
chr1	121600001	121700000	9	9e-05
chr1	121700001	121800000	12	0.00012
chr1	126800001	126900000	2	2e-05
chr1	126900001	127000000	3	3e-05
chr1	142500001	142600000	6	6e-05
chr1	142800001	142900000	2	2e-05
chr1	142900001	143000000	6	6e-05
chr1	151600001	151700000	11	0.00011
chr1	151700001	151800000	8	8e-05
chr1	151800001	151900000	10	0.0001
chr1	166600001	166700000	7	7e-05
chr1	177300001	177400000	4	4e-05
chr1	178600001	178700000	3	3e-05
chr1	180600001	180700000	17	0.00017
chr1	188100001	188200000	16	0.00016
chr10	30100001	30200000	8	8e-05
chr10	34700001	34800000	16	0.00016
chr10	34800001	34900000	8	8e-05
chr10	39700001	39800000	1	1e-05
chr10	39800001	39900000	4	4e-05
chr10	47400001	47500000	1	1e-05
chr10	53800001	53900000	17	0.00017
chr10	75100001	75200000	17	0.00017
chr11	11800001	11900000	16	0.00016
chr11	27700001	27800000	14	0.00014
chr11	27800001	27900000	1	1e-05
chr11	29200001	29300000	16	0.00016
chr11	29300001	29400000	6	6e-05
chr11	29900001	30000000	17	0.00017
chr11	30000001	30100000	17	0.00017
chr11	49200001	49300000	4	4e-05
chr12	13300001	13400000	16	0.00016
chr12	20200001	20300000	15	0.00015
chr12	28200001	28300000	4	4e-05
chr14	29000001	29100000	7	7e-05
chr14	29100001	29200000	17	0.00017
chr14	38900001	39000000	11	0.00011
chr14	54100001	54200000	17	0.00017
chr14	59100001	59200000	6	6e-05
chr14	82600001	82700000	11	0.00011
chr14	86500001	86600000	7	7e-05
chr14	86600001	86700000	17	0.00017
chr14	90800001	90900000	6	6e-05
chr14	90900001	91000000	16	0.00016
chr15	6500001	6600000	15	0.00015
chr15	15200001	15300000	1	1e-05
chr15	27700001	27800000	10	0.0001
chr15	43100001	43200000	12	0.00012
chr16	11100001	11200000	15	0.00015
chr16	11200001	11300000	16	0.00016
chr16	23000001	23100000	5	5e-05
chr16	58000001	58100000	15	0.00015
chr17	44500001	44600000	8	8e-05
chr17	44700001	44800000	13	0.00013
chr17	44800001	44900000	16	0.00016
chr18	29600001	29700000	17	0.00017
chr19	19900001	20000000	13	0.00013
chr19	31400001	31500000	12	0.00012
chr19	31500001	31600000	10	0.0001
chr19	44200001	44300000	1	1e-05
chr2	72900001	73000000	17	0.00017
chr2	77800001	77900000	17	0.00017
chr2	91300001	91400000	1	1e-05
chr2	102600001	102700000	17	0.00017
chr2	102700001	102800000	14	0.00014
chr2	107500001	107600000	16	0.00016
chr2	111700001	111800000	8	8e-05
chr2	116900001	117000000	15	0.00015
chr20	4300001	4400000	7	7e-05
chr20	7600001	7700000	3	3e-05
chr20	7700001	7800000	1	1e-05
chr20	21300001	21400000	14	0.00014
chr20	21400001	21500000	6	6e-05
chr20	21500001	21600000	1	1e-05
chr20	44800001	44900000	13	0.00013
chr21	8500001	8600000	14	0.00014
chr21	23600001	23700000	11	0.00011
chr21	34200001	34300000	14	0.00014
chr21	34900001	35000000	16	0.00016
chr21	35000001	35100000	17	0.00017
chr21	36400001	36500000	9	9e-05
chr21	36900001	37000000	17	0.00017
chr21	37200001	37300000	15	0.00015
chr21	37500001	37600000	17	0.00017
chr21	37700001	37800000	17	0.00017
chr21	37800001	37900000	17	0.00017
chr21	38100001	38200000	17	0.00017
chr21	42500001	42600000	15	0.00015
chr21	43000001	43100000	2	2e-05
chr22	6300001	6400000	2	2e-05
chr22	11800001	11900000	16	0.00016
chr22	14500001	14600000	15	0.00015
chr22	42900001	43000000	8	8e-05
chr23	3800001	3900000	1	1e-05
chr23	15900001	16000000	3	3e-05
chr23	25100001	25200000	16	0.00016
chr23	26000001	26100000	16	0.00016
chr23	26300001	26400000	8	8e-05
chr23	36300001	36400000	16	0.00016
chr23	36500001	36600000	14	0.00014
chr23	45200001	45300000	5	5e-05
chr23	45300001	45400000	11	0.00011
chr24	19600001	19700000	14	0.00014
chr24	30600001	30700000	17	0.00017
chr24	32900001	33000000	1	1e-05
chr24	35900001	36000000	1	1e-05
chr24	36000001	36100000	12	0.00012
chr25	28200001	28300000	1	1e-05
chr25	28300001	28400000	4	4e-05
chr25	29200001	29300000	17	0.00017
chr26	2200001	2300000	1	1e-05
chr26	5900001	6000000	14	0.00014
chr26	16500001	16600000	1	1e-05
chr26	17500001	17600000	9	9e-05
chr26	28700001	28800000	5	5e-05
chr26	28800001	28900000	2	2e-05
chr27	21700001	21800000	15	0.00015
chr28	7400001	7500000	10	0.0001
chr28	16000001	16100000	6	6e-05
chr28	16100001	16200000	2	2e-05
chr28	21600001	21700000	14	0.00014
chr28	22400001	22500000	12	0.00012
chr28	36000001	36100000	5	5e-05
chr29	14300001	14400000	6	6e-05
chr3	46100001	46200000	9	9e-05
chr3	46600001	46700000	2	2e-05
chr3	46700001	46800000	1	1e-05
chr3	85000001	85100000	1	1e-05
chr3	92300001	92400000	17	0.00017
chr3	95700001	95800000	16	0.00016
chr30	11100001	11200000	7	7e-05
chr30	14700001	14800000	16	0.00016
chr30	25300001	25400000	7	7e-05
chr30	25600001	25700000	6	6e-05
chr30	29300001	29400000	13	0.00013
chr31	26000001	26100000	1	1e-05
chr4	10500001	10600000	3	3e-05
chr4	21900001	22000000	7	7e-05
chr4	43800001	43900000	4	4e-05
chr4	44900001	45000000	16	0.00016
chr4	99200001	99300000	14	0.00014
chr4	100100001	100200000	15	0.00015
chr4	100600001	100700000	9	9e-05
chr4	109400001	109500000	13	0.00013
chr6	900001	1000000	15	0.00015
chr6	1400001	1500000	15	0.00015
chr6	1900001	2000000	17	0.00017
chr6	3100001	3200000	10	0.0001
chr6	3300001	3400000	6	6e-05
chr6	13700001	13800000	1	1e-05
chr6	46700001	46800000	3	3e-05
chr6	49100001	49200000	14	0.00014
chr6	77800001	77900000	14	0.00014
chr6	78600001	78700000	1	1e-05
chr6	79200001	79300000	1	1e-05
chr6	79300001	79400000	16	0.00016
chr7	15300001	15400000	16	0.00016
chr7	27200001	27300000	4	4e-05
chr7	30800001	30900000	2	2e-05
chr7	30900001	31000000	6	6e-05
chr7	31100001	31200000	7	7e-05
chr7	32300001	32400000	16	0.00016
chr7	34700001	34800000	2	2e-05
chr7	37500001	37600000	17	0.00017
chr7	37600001	37700000	16	0.00016
chr7	60300001	60400000	9	9e-05
chr7	62200001	62300000	9	9e-05
chr7	62500001	62600000	14	0.00014
chr7	62800001	62900000	14	0.00014
chr7	62900001	63000000	14	0.00014
chr7	63400001	63500000	17	0.00017
chr7	63500001	63600000	12	0.00012
chr8	8400001	8500000	14	0.00014
chr8	17700001	17800000	13	0.00013
chr8	36100001	36200000	14	0.00014
chr8	67700001	67800000	17	0.00017
chr9	20300001	20400000	1	1e-05
chr9	20400001	20500000	17	0.00017
chr9	22900001	23000000	10	0.0001
chr9	38100001	38200000	3	3e-05
chr9	53100001	53200000	13	0.00013
chr9	56100001	56200000	17	0.00017
chr9	56300001	56400000	14	0.00014
chr9	56600001	56700000	16	0.00016
chr9	57000001	57100000	17	0.00017
chr9	57200001	57300000	4	4e-05
chr9	57600001	57700000	12	0.00012
chr9	57700001	57800000	12	0.00012
chr9	57800001	57900000	13	0.00013
chr9	58000001	58100000	16	0.00016
chr9	58400001	58500000	14	0.00014
chr9	58500001	58600000	16	0.00016
chr9	58700001	58800000	15	0.00015
chr9	59000001	59100000	17	0.00017
chr9	59100001	59200000	16	0.00016
chr9	59200001	59300000	13	0.00013
chr9	65800001	65900000	7	7e-05
chr9	66800001	66900000	5	5e-05
chr9	71600001	71700000	10	0.0001
chrM	1	100000	3	3e-05
chrX	11400001	11500000	2	2e-05
chrX	15700001	15800000	17	0.00017
chrX	18100001	18200000	14	0.00014
chrX	22500001	22600000	8	8e-05
chrX	26800001	26900000	2	2e-05
chrX	30300001	30400000	9	9e-05
chrX	30400001	30500000	2	2e-05
chrX	30600001	30700000	10	0.0001
chrX	32600001	32700000	16	0.00016
chrX	35300001	35400000	8	8e-05
chrX	35400001	35500000	11	0.00011
chrX	37600001	37700000	17	0.00017
chrX	50500001	50600000	14	0.00014
chrX	62800001	62900000	9	9e-05
chrX	63600001	63700000	3	3e-05
chrX	67600001	67700000	4	4e-05
chrX	68300001	68400000	7	7e-05
chrX	71600001	71700000	11	0.00011
chrX	72000001	72100000	15	0.00015
chrX	91300001	91400000	3	3e-05
chrX	101200001	101300000	4	4e-05
chrX	101500001	101600000	7	7e-05
chrX	102300001	102400000	4	4e-05
chrX	104200001	104300000	12	0.00012
chrX	124000001	124100000	6	6e-05
chrX	126000001	126100000	15	0.00015
chrX	126700001	126800000	11	0.00011
chrX	126800001	126900000	14	0.00014
chrX	127300001	127400000	15	0.00015
chrX	128200001	128300000	5	5e-05

## Sheet: CHgenes
chr1	7000001	7100000	ADAM12
chr1	7000001	7100000	Adam12
chr1	40000001	40100000	Lipk
chr1	40000001	40100000	lipl-1
chr1	40000001	40100000	Lipo4
chr1	40000001	40100000	lipl-2
chr1	40100001	40200000	lipa
chr1	40100001	40200000	Gm8978
chr1	40100001	40200000	LOC101824484
chr1	40100001	40200000	LIPF
chr1	40100001	40200000	Lipo1
chr1	40100001	40200000	Lipo2
chr1	40400001	40500000	RNLS
chr1	40400001	40500000	rnls.L
chr1	142800001	142900000	MYEF2
chr1	142800001	142900000	slc24a4a
chr1	142800001	142900000	dut.L
chr1	142800001	142900000	DUT
chr1	142800001	142900000	SLC12A1
chr1	142800001	142900000	dut-1
chr1	151600001	151700000	LOC100289495
chr1	151600001	151700000	TIGD1
chr1	151600001	151700000	COA1
chr1	151600001	151700000	NR3C2
chr1	151600001	151700000	ASPA
chr1	151600001	151700000	MIA2
chr1	151600001	151700000	ZNF621
chr10	39700001	39800000	Nt5e
chr10	39800001	39900000	snx14
chr10	39800001	39900000	snx14.L
chr10	53800001	53900000	GRIK3
chr10	53800001	53900000	GRIK2
chr10	53800001	53900000	LOC102090990
chr10	53800001	53900000	grik2.L
chr11	11800001	11900000	abca5
chr11	30000001	30100000	Stxbp4
chr12	13300001	13400000	OR4P4
chr12	13300001	13400000	Olfr1180
chr12	13300001	13400000	Olr630
chr12	13300001	13400000	Olr648
chr12	13300001	13400000	Olr1400
chr12	13300001	13400000	Olfr1383
chr12	13300001	13400000	Olr1392
chr12	28200001	28300000	LOC100274662
chr14	59100001	59200000	EPB41L4A
chr14	59100001	59200000	epb41l4a.S
chr14	59100001	59200000	e41l4
chr14	82600001	82700000	Edil3
chr14	86500001	86600000	HOMER1
chr15	15200001	15300000	EID2
chr15	43100001	43200000	LINC01122
chr16	11200001	11300000	GRM7-AS3
chr16	23000001	23100000	TAFA1
chr2	72900001	73000000	Fstl5
chr2	91300001	91400000	Clgn
chr2	107500001	107600000	PRDM5
chr2	116900001	117000000	COL25A1
chr20	7700001	7800000	RREB1
chr20	21400001	21500000	HDGF
chr20	21400001	21500000	HDGFL1
chr20	44800001	44900000	SUPT3H
chr20	44800001	44900000	supt3h.L
chr20	44800001	44900000	Supt3
chr21	42500001	42600000	CDH18
chr22	6300001	6400000	DTD1
chr23	25100001	25200000	GLIS3
chr23	26000001	26100000	TET2
chr23	26000001	26100000	LOC101927356
chr23	36500001	36600000	CNTLN
chr23	36500001	36600000	Zfp74
chr24	19600001	19700000	Lin52
chr24	19600001	19700000	LOC100136175
chr24	32900001	33000000	FOXN3
chr24	32900001	33000000	foxn3.S
chr24	32900001	33000000	foxn3.L
chr24	32900001	33000000	ches1
chr24	35900001	36000000	CHGA
chr24	35900001	36000000	ITPK1
chr24	35900001	36000000	golga5
chr24	35900001	36000000	LGMN
chr24	36000001	36100000	itpk1a
chr25	28200001	28300000	DENND1A
chr25	28200001	28300000	dennd1a.S
chr25	29200001	29300000	NR6A1
chr26	28700001	28800000	KRTAP20-2
chr26	28700001	28800000	Krtap6-2
chr26	28700001	28800000	KRTAP6-1
chr26	28700001	28800000	Gm10229
chr26	28700001	28800000	Gm10228
chr26	28700001	28800000	1110025L11Rik
chr26	28700001	28800000	Krtap6-5
chr26	28700001	28800000	KRTAP21-1
chr26	28700001	28800000	KRTAP6-3
chr26	28700001	28800000	Krtap16-3
chr26	28700001	28800000	Krtap19-1
chr26	28700001	28800000	Krtap19-5
chr26	28700001	28800000	KAP6.1.1
chr26	28700001	28800000	Gm9789
chr26	28700001	28800000	KRTAP19-6
chr26	28700001	28800000	Krtap19-4
chr26	28700001	28800000	Krtap19-2
chr26	28700001	28800000	Krtap19-9b
chr28	7400001	7500000	Syt1
chr28	22400001	22500000	CFAP54
chr28	36000001	36100000	Triobp
chr29	14300001	14400000	PIP4K2A
chr3	46100001	46200000	GRID2
chr30	11100001	11200000	MARK1
chr30	11100001	11200000	mark1.S
chr30	11100001	11200000	mark2.L
chr30	14700001	14800000	CG13560
chr30	14700001	14800000	TGFB2
chr30	14700001	14800000	tgfb1b
chr30	14700001	14800000	RRP15
chr30	25600001	25700000	KCNT2
chr4	10500001	10600000	POU6F2
chr4	44900001	45000000	Thsd7a
chr4	99200001	99300000	CNTNAP2
chr4	100100001	100200000	cntnap2b
chr4	100100001	100200000	cntnap2a
chr6	900001	1000000	CPS1
chr6	1900001	2000000	erbb4a
chr6	1900001	2000000	ERBB4
chr6	1900001	2000000	erbb4.L
chr6	1900001	2000000	erbb3a
chr6	1900001	2000000	erbb3b
chr6	1900001	2000000	LOC100149258
chr6	3300001	3400000	IKZF2
chr6	79300001	79400000	Tafa2
chr7	27200001	27300000	Bcl9l
chr7	30800001	30900000	JHY
chr7	30800001	30900000	Crtam
chr7	30800001	30900000	ubash3bb
chr7	30800001	30900000	hsc70
chr7	30800001	30900000	UBASH3B
chr7	30900001	31000000	Hsp70
chr7	30900001	31000000	bsx
chr7	30900001	31000000	hsc70.ii
chr7	31100001	31200000	Clmp
chr7	32300001	32400000	OR10G4
chr7	32300001	32400000	Olfr979
chr7	32300001	32400000	OR8D4
chr7	32300001	32400000	OR10G9
chr7	32300001	32400000	Olr1449
chr7	34700001	34800000	PKNOX2
chr7	62200001	62300000	DLG2
chr7	63500001	63600000	dlg1
chr8	8400001	8500000	SLC35E4
chr8	17700001	17800000	TAOK3
chr8	36100001	36200000	PTPRM
chr8	36100001	36200000	KLHL7-DT
chr8	36100001	36200000	ptprma
chr8	36100001	36200000	ptprub
chr9	22900001	23000000	Nkain3
chr9	22900001	23000000	nkain4
chr9	22900001	23000000	zgc:100920
chr9	22900001	23000000	nkain4.S
chr9	53100001	53200000	Oxr1
chr9	58400001	58500000	CSMD3
chrX	26800001	26900000	DMD
chrX	30300001	30400000	CFAP47
chrX	30400001	30500000	LOC101928627
chrX	32600001	32700000	tspan7b
chrX	35300001	35400000	CASK
chrX	35300001	35400000	caskb
chrX	35300001	35400000	CYYR1-AS1
chrX	35300001	35400000	caska
chrX	101500001	101600000	gria3.L
chrX	101500001	101600000	gria3
chrX	126000001	126100000	BCAP31

## Sheet: MM
chr1	5200001	5300000	37	0.00037
chr1	7000001	7100000	8	8e-05
chr1	35700001	35800000	30	0.0003
chr1	53200001	53300000	1	1e-05
chr1	73700001	73800000	7	7e-05
chr1	74700001	74800000	33	0.00033
chr1	98500001	98600000	11	0.00011
chr1	111000001	111100000	23	0.00023
chr1	116600001	116700000	2	2e-05
chr1	121600001	121700000	15	0.00015
chr1	121700001	121800000	18	0.00018
chr1	126800001	126900000	4	4e-05
chr1	126900001	127000000	6	6e-05
chr1	134800001	134900000	11	0.00011
chr1	142500001	142600000	4	4e-05
chr1	142800001	142900000	2	2e-05
chr1	142900001	143000000	16	0.00016
chr1	151600001	151700000	16	0.00016
chr1	151700001	151800000	3	3e-05
chr1	151800001	151900000	3	3e-05
chr1	157200001	157300000	29	0.00029
chr1	160600001	160700000	16	0.00016
chr1	173200001	173300000	33	0.00033
chr1	173300001	173400000	26	0.00026
chr1	177300001	177400000	7	7e-05
chr1	178600001	178700000	2	2e-05
chr1	179100001	179200000	32	0.00032
chr1	188100001	188200000	20	0.0002
chr10	19800001	19900000	37	0.00037
chr10	22200001	22300000	22	0.00022
chr10	22700001	22800000	12	0.00012
chr10	24300001	24400000	36	0.00036
chr10	30100001	30200000	3	3e-05
chr10	34700001	34800000	1	1e-05
chr10	34800001	34900000	5	5e-05
chr10	39300001	39400000	25	0.00025
chr10	39800001	39900000	5	5e-05
chr10	47400001	47500000	5	5e-05
chr10	47500001	47600000	23	0.00023
chr11	5000001	5100000	36	0.00036
chr11	27700001	27800000	11	0.00011
chr11	27800001	27900000	1	1e-05
chr11	49200001	49300000	8	8e-05
chr12	1500001	1600000	36	0.00036
chr12	4000001	4100000	20	0.0002
chr12	16800001	16900000	21	0.00021
chr12	28200001	28300000	5	5e-05
chr12	29400001	29500000	35	0.00035
chr12	32000001	32100000	37	0.00037
chr12	32100001	32200000	31	0.00031
chr12	32200001	32300000	34	0.00034
chr12	35700001	35800000	36	0.00036
chr13	2700001	2800000	25	0.00025
chr13	2800001	2900000	16	0.00016
chr13	28700001	28800000	8	8e-05
chr13	35800001	35900000	34	0.00034
chr14	23900001	24000000	23	0.00023
chr14	35500001	35600000	37	0.00037
chr14	58900001	59000000	37	0.00037
chr14	59100001	59200000	9	9e-05
chr14	59300001	59400000	29	0.00029
chr14	82600001	82700000	7	7e-05
chr14	86500001	86600000	1	1e-05
chr14	86600001	86700000	8	8e-05
chr15	6200001	6300000	6	6e-05
chr15	6500001	6600000	3	3e-05
chr15	8900001	9000000	20	0.0002
chr15	13800001	13900000	11	0.00011
chr15	15300001	15400000	1	1e-05
chr15	19300001	19400000	1	1e-05
chr15	27700001	27800000	3	3e-05
chr15	45800001	45900000	36	0.00036
chr15	74200001	74300000	2	2e-05
chr16	25500001	25600000	26	0.00026
chr16	74300001	74400000	23	0.00023
chr17	80400001	80500000	37	0.00037
chr17	80700001	80800000	10	0.0001
chr18	9800001	9900000	36	0.00036
chr18	10300001	10400000	35	0.00035
chr19	31500001	31600000	5	5e-05
chr19	44100001	44200000	26	0.00026
chr19	44200001	44300000	1	1e-05
chr19	55200001	55300000	36	0.00036
chr2	9900001	10000000	37	0.00037
chr2	16900001	17000000	37	0.00037
chr2	26500001	26600000	29	0.00029
chr2	31300001	31400000	12	0.00012
chr2	61200001	61300000	3	3e-05
chr2	71900001	72000000	1	1e-05
chr2	77800001	77900000	19	0.00019
chr2	77900001	78000000	37	0.00037
chr2	91300001	91400000	2	2e-05
chr2	111700001	111800000	8	8e-05
chr2	112800001	112900000	2	2e-05
chr2	121300001	121400000	25	0.00025
chr20	4300001	4400000	7	7e-05
chr20	7700001	7800000	1	1e-05
chr20	13100001	13200000	15	0.00015
chr20	13400001	13500000	4	4e-05
chr20	19600001	19700000	32	0.00032
chr20	21300001	21400000	9	9e-05
chr20	21400001	21500000	3	3e-05
chr20	46000001	46100000	35	0.00035
chr20	60500001	60600000	35	0.00035
chr20	65300001	65400000	19	0.00019
chr21	8500001	8600000	37	0.00037
chr21	23600001	23700000	7	7e-05
chr22	8000001	8100000	12	0.00012
chr22	17900001	18000000	1	1e-05
chr22	24500001	24600000	35	0.00035
chr22	25700001	25800000	3	3e-05
chr22	42900001	43000000	9	9e-05
chr23	3300001	3400000	28	0.00028
chr23	6000001	6100000	7	7e-05
chr23	6300001	6400000	36	0.00036
chr23	7700001	7800000	36	0.00036
chr23	15900001	16000000	7	7e-05
chr23	19400001	19500000	14	0.00014
chr23	19500001	19600000	26	0.00026
chr23	26300001	26400000	34	0.00034
chr23	28200001	28300000	14	0.00014
chr23	45200001	45300000	6	6e-05
chr23	45300001	45400000	9	9e-05
chr24	12200001	12300000	25	0.00025
chr24	19600001	19700000	14	0.00014
chr24	30300001	30400000	28	0.00028
chr24	30600001	30700000	17	0.00017
chr24	32900001	33000000	1	1e-05
chr24	35900001	36000000	2	2e-05
chr24	36000001	36100000	16	0.00016
chr24	38700001	38800000	17	0.00017
chr24	47800001	47900000	37	0.00037
chr25	9400001	9500000	36	0.00036
chr25	13600001	13700000	22	0.00022
chr25	13800001	13900000	29	0.00029
chr25	14200001	14300000	7	7e-05
chr25	15400001	15500000	15	0.00015
chr25	26500001	26600000	37	0.00037
chr25	28200001	28300000	1	1e-05
chr25	28300001	28400000	3	3e-05
chr25	28400001	28500000	14	0.00014
chr25	34300001	34400000	35	0.00035
chr26	2200001	2300000	4	4e-05
chr26	5900001	6000000	19	0.00019
chr26	11700001	11800000	35	0.00035
chr26	16500001	16600000	2	2e-05
chr26	19900001	20000000	9	9e-05
chr26	28700001	28800000	5	5e-05
chr26	28800001	28900000	6	6e-05
chr26	43100001	43200000	35	0.00035
chr27	17400001	17500000	33	0.00033
chr28	2600001	2700000	23	0.00023
chr28	7300001	7400000	1	1e-05
chr28	7400001	7500000	8	8e-05
chr28	16000001	16100000	14	0.00014
chr28	16100001	16200000	1	1e-05
chr28	36000001	36100000	5	5e-05
chr29	11500001	11600000	2	2e-05
chr29	25500001	25600000	30	0.0003
chr3	4900001	5000000	31	0.00031
chr3	35700001	35800000	34	0.00034
chr3	35800001	35900000	36	0.00036
chr3	36700001	36800000	37	0.00037
chr3	46100001	46200000	17	0.00017
chr3	46600001	46700000	5	5e-05
chr3	46700001	46800000	1	1e-05
chr3	59700001	59800000	21	0.00021
chr3	85000001	85100000	1	1e-05
chr3	92300001	92400000	14	0.00014
chr30	11100001	11200000	9	9e-05
chr30	14700001	14800000	4	4e-05
chr30	25200001	25300000	2	2e-05
chr30	25300001	25400000	7	7e-05
chr31	26000001	26100000	1	1e-05
chr4	10300001	10400000	24	0.00024
chr4	21900001	22000000	3	3e-05
chr4	43800001	43900000	13	0.00013
chr4	69500001	69600000	35	0.00035
chr4	100100001	100200000	7	7e-05
chr4	100600001	100700000	14	0.00014
chr5	86600001	86700000	18	0.00018
chr5	86700001	86800000	14	0.00014
chr5	96700001	96800000	31	0.00031
chr6	3200001	3300000	5	5e-05
chr6	12400001	12500000	10	0.0001
chr6	12700001	12800000	35	0.00035
chr6	13700001	13800000	1	1e-05
chr6	20000001	20100000	34	0.00034
chr6	39400001	39500000	13	0.00013
chr6	46700001	46800000	13	0.00013
chr6	48600001	48700000	24	0.00024
chr6	49100001	49200000	11	0.00011
chr6	56000001	56100000	20	0.0002
chr6	73000001	73100000	5	5e-05
chr6	73100001	73200000	32	0.00032
chr6	77800001	77900000	18	0.00018
chr6	79200001	79300000	3	3e-05
chr6	79300001	79400000	10	0.0001
chr6	79400001	79500000	25	0.00025
chr6	87200001	87300000	17	0.00017
chr7	3900001	4000000	37	0.00037
chr7	26100001	26200000	10	0.0001
chr7	27100001	27200000	33	0.00033
chr7	27200001	27300000	5	5e-05
chr7	30800001	30900000	7	7e-05
chr7	30900001	31000000	6	6e-05
chr7	31100001	31200000	15	0.00015
chr7	34700001	34800000	6	6e-05
chr7	45100001	45200000	30	0.0003
chr7	60300001	60400000	1	1e-05
chr7	75700001	75800000	31	0.00031
chr7	90700001	90800000	2	2e-05
chr8	3700001	3800000	27	0.00027
chr8	3800001	3900000	16	0.00016
chr8	4400001	4500000	23	0.00023
chr8	8400001	8500000	14	0.00014
chr8	29400001	29500000	1	1e-05
chr8	34400001	34500000	33	0.00033
chr8	53400001	53500000	32	0.00032
chr8	66700001	66800000	29	0.00029
chr8	97500001	97600000	34	0.00034
chr9	300001	400000	34	0.00034
chr9	7600001	7700000	35	0.00035
chr9	7800001	7900000	4	4e-05
chr9	7900001	8000000	3	3e-05
chr9	20300001	20400000	1	1e-05
chr9	20400001	20500000	15	0.00015
chr9	22800001	22900000	19	0.00019
chr9	22900001	23000000	19	0.00019
chr9	38100001	38200000	14	0.00014
chr9	50100001	50200000	26	0.00026
chr9	57200001	57300000	35	0.00035
chr9	58700001	58800000	37	0.00037
chr9	65800001	65900000	2	2e-05
chr9	66800001	66900000	1	1e-05
chr9	84500001	84600000	26	0.00026

## Sheet: MMgenes
chr1	7000001	7100000	ADAM12
chr1	7000001	7100000	Adam12
chr1	98500001	98600000	SV2B
chr1	142800001	142900000	MYEF2
chr1	142800001	142900000	slc24a4a
chr1	142800001	142900000	dut.L
chr1	142800001	142900000	DUT
chr1	142800001	142900000	SLC12A1
chr1	142800001	142900000	dut-1
chr1	151600001	151700000	LOC100289495
chr1	151600001	151700000	TIGD1
chr1	151600001	151700000	COA1
chr1	151600001	151700000	NR3C2
chr1	151600001	151700000	ASPA
chr1	151600001	151700000	MIA2
chr1	151600001	151700000	ZNF621
chr1	157200001	157300000	Olfr1387
chr1	157200001	157300000	Olfr530
chr1	157200001	157300000	Olfr1313
chr1	157200001	157300000	Olfr1391
chr1	157200001	157300000	Olr14
chr1	157200001	157300000	Olr778
chr10	19800001	19900000	OSCAR
chr10	19800001	19900000	KLK4
chr10	19800001	19900000	rbmx2
chr10	22200001	22300000	monDomV1R1208
chr10	22200001	22300000	ORNANAV1R3129
chr10	22200001	22300000	monDomV1R1209
chr10	22200001	22300000	monDomV1R1246
chr10	22200001	22300000	monDomV1R1213
chr10	22200001	22300000	Zfp948
chr10	22200001	22300000	Vom1r13
chr10	22200001	22300000	Vom1r9
chr10	22200001	22300000	monDomV1R1293
chr10	22200001	22300000	Cavporv1r684
chr10	22200001	22300000	Cavporv1r618
chr10	22200001	22300000	Cavporv1r619
chr10	22200001	22300000	Vmn1r81
chr10	22200001	22300000	ORNANAV1R3168
chr10	22200001	22300000	monDomV1R1230
chr10	22200001	22300000	Vmn1r78
chr10	22200001	22300000	Vmn1r233
chr10	22200001	22300000	Cavporv1r615
chr10	22200001	22300000	ORYCUNV1R1599
chr10	22200001	22300000	LINC02190
chr10	22200001	22300000	ORYCUNV1R1535
chr10	22200001	22300000	ORYCUNV1R1520
chr10	22200001	22300000	Cavporv1r616
chr10	22200001	22300000	ORNANAV1R3097
chr10	22200001	22300000	monDomV1R1227
chr10	22200001	22300000	monDomV1R1291
chr10	22200001	22300000	monDomV1R1284
chr10	22200001	22300000	monDomV1R1288
chr10	22200001	22300000	monDomV1R1285
chr10	22200001	22300000	monDomV1R1287
chr10	22200001	22300000	monDomV1R1289
chr10	22200001	22300000	monDomV1R1295
chr10	22200001	22300000	Vmn1r83
chr10	22200001	22300000	Vmn1r228
chr10	22200001	22300000	Vmn1r229
chr10	22200001	22300000	Cavporv1r640
chr10	22200001	22300000	PONPYGV1R1804
chr10	22200001	22300000	Cavporv1r622
chr10	22200001	22300000	ORNANAV1R3271
chr10	22200001	22300000	Vmn1r236
chr10	22200001	22300000	Vmn1r67
chr10	22200001	22300000	Cavporv1r625
chr10	22200001	22300000	Vmn1r220
chr10	22200001	22300000	Vmn1r217
chr10	22200001	22300000	Vmn1r226
chr10	22200001	22300000	Cavporv1r685
chr10	22200001	22300000	ORNANAV1R3210
chr10	22200001	22300000	Vmn1r84
chr10	22200001	22300000	monDomV1R1207
chr10	22200001	22300000	monDomV1R1229
chr10	22200001	22300000	monDomV1R1205
chr10	22200001	22300000	monDomV1R1232
chr10	22200001	22300000	monDomV1R1242
chr10	22200001	22300000	monDomV1R1243
chr10	22200001	22300000	monDomV1R1245
chr10	22200001	22300000	monDomV1R1236
chr10	22200001	22300000	ORNANAV1R3253
chr10	22200001	22300000	monDomV1R1240
chr10	22200001	22300000	monDomV1R1206
chr10	22200001	22300000	monDomV1R1283
chr10	22200001	22300000	monDomV1R1235
chr10	22200001	22300000	monDomV1R1204
chr10	22200001	22300000	monDomV1R1211
chr10	22200001	22300000	monDomV1R1237
chr10	22200001	22300000	ORNANAV1R3028
chr10	22200001	22300000	monDomV1R1238
chr10	22200001	22300000	ORNANAV1R3130
chr10	22200001	22300000	ORYCUNV1R1545
chr10	22200001	22300000	Gm13212
chr10	22200001	22300000	Zfp820
chr10	22200001	22300000	Zfp980
chr10	22200001	22300000	znf214
chr10	22200001	22300000	Zfp945
chr10	22200001	22300000	Zfp600
chr10	22200001	22300000	Zfp52
chr10	22200001	22300000	Zfp946
chr10	22200001	22300000	Zfp458
chr10	22200001	22300000	Gm2381
chr10	22200001	22300000	Zfp738
chr10	22200001	22300000	Zfp748
chr10	22200001	22300000	Zfp40
chr10	22200001	22300000	znf41.S
chr10	22200001	22300000	Zfp719
chr10	22200001	22300000	Gm7072
chr10	22200001	22300000	ZNF701
chr10	22200001	22300000	Zfp982
chr10	22200001	22300000	ZNF525
chr10	22200001	22300000	ZNF320
chr10	22200001	22300000	ZNF594
chr10	22200001	22300000	ZNF99
chr10	22200001	22300000	LOC100216020
chr10	22200001	22300000	ZNF267
chr10	22200001	22300000	ZNF208
chr10	22200001	22300000	ZNF765-ZNF761
chr10	22200001	22300000	ZNF765
chr10	22200001	22300000	ZNF813
chr10	22200001	22300000	ZNF585B
chr10	22200001	22300000	ZNF845
chr10	22200001	22300000	ZNF468
chr10	22700001	22800000	ZNF117
chr10	22700001	22800000	ZNF708
chr10	22700001	22800000	ZNF415
chr10	22700001	22800000	ORNANAV1R3012
chr10	22700001	22800000	ZNF92
chr10	22700001	22800000	ORNANAV1R3248
chr10	22700001	22800000	ZNF98
chr10	22700001	22800000	ZNF160
chr10	22700001	22800000	zgc:162958
chr10	22700001	22800000	ZNF761
chr10	22700001	22800000	ZNF83
chr10	22700001	22800000	ZNF616
chr10	22700001	22800000	ZNF493
chr10	22700001	22800000	ZNF534
chr10	22700001	22800000	ZNF93
chr10	22700001	22800000	monDomV1R1222
chr10	22700001	22800000	monDomV1R1214
chr10	22700001	22800000	ZNF429
chr10	22700001	22800000	monDomV1R1251
chr10	22700001	22800000	ZNF486
chr10	22700001	22800000	Zfp54
chr10	22700001	22800000	ZNF347
chr10	22700001	22800000	Vmn1r224
chr10	22700001	22800000	ORYCUNV1R1570
chr10	22700001	22800000	ORYCUNV1R1620
chr10	22700001	22800000	ORYCUNV1R1647
chr10	22700001	22800000	ORYCUNV1R1624
chr10	22700001	22800000	ORYCUNV1R1573
chr10	22700001	22800000	ORYCUNV1R1600
chr10	22700001	22800000	ORYCUNV1R1527
chr10	22700001	22800000	ORYCUNV1R1504
chr10	22700001	22800000	ORYCUNV1R1560
chr10	22700001	22800000	ORYCUNV1R1576
chr10	22700001	22800000	ORYCUNV1R1634
chr10	22700001	22800000	ORYCUNV1R1502
chr10	22700001	22800000	ORYCUNV1R1636
chr10	22700001	22800000	ORYCUNV1R1591
chr10	22700001	22800000	ORYCUNV1R1642
chr10	22700001	22800000	ORYCUNV1R1619
chr10	22700001	22800000	ORYCUNV1R1611
chr10	22700001	22800000	PONPYGV1R1805
chr10	22700001	22800000	ORYCUNV1R1631
chr10	22700001	22800000	Cavporv1r617
chr10	22700001	22800000	ORYCUNV1R1657
chr10	22700001	22800000	ORYCUNV1R1583
chr10	22700001	22800000	ORNANAV1R3282
chr10	22700001	22800000	ORNANAV1R3100
chr10	22700001	22800000	ORNANAV1R3073
chr10	22700001	22800000	Cavporv1r624
chr10	22700001	22800000	ORNANAV1R3077
chr10	22700001	22800000	ORNANAV1R3257
chr10	22700001	22800000	ORNANAV1R3032
chr10	22700001	22800000	ORNANAV1R3273
chr10	22700001	22800000	ORNANAV1R3226
chr10	22700001	22800000	ORNANAV1R3059
chr10	22700001	22800000	ORNANAV1R3178
chr10	22700001	22800000	ORNANAV1R3039
chr10	22700001	22800000	ORNANAV1R3278
chr10	22700001	22800000	ORNANAV1R3270
chr10	22700001	22800000	ORNANAV1R3269
chr10	22700001	22800000	ORYCUNV1R1664
chr10	22700001	22800000	ORYCUNV1R1668
chr10	22700001	22800000	Cavporv1r628
chr10	22700001	22800000	ORYCUNV1R1615
chr10	22700001	22800000	monDomV1R1294
chr10	22700001	22800000	Vmn1r235
chr10	22700001	22800000	Vmn1r70
chr10	22700001	22800000	ORNANAV1R3042
chr10	22700001	22800000	ORYCUNV1R1658
chr10	22700001	22800000	FELCATV1R13
chr10	22700001	22800000	Cavporv1r635
chr10	22700001	22800000	Vmn1r225
chr10	22700001	22800000	Cavporv1r637
chr10	22700001	22800000	Vom1r17
chr10	22700001	22800000	monDomV1R1292
chr10	22700001	22800000	monDomV1R1286
chr10	22700001	22800000	Cavporv1r621
chr10	22700001	22800000	monDomV1R1267
chr10	22700001	22800000	monDomV1R1266
chr10	22700001	22800000	Vmn1r80
chr10	22700001	22800000	ORNANAV1R3054
chr10	22700001	22800000	ORNANAV1R3207
chr10	22700001	22800000	ORNANAV1R3031
chr10	22700001	22800000	ORNANAV1R3069
chr10	22700001	22800000	ORNANAV1R3044
chr10	22700001	22800000	ORNANAV1R3082
chr10	22700001	22800000	ORNANAV1R3135
chr10	22700001	22800000	ORNANAV1R3190
chr10	22700001	22800000	ORNANAV1R3258
chr10	22700001	22800000	monDomV1R1290
chr10	22700001	22800000	monDomV1R1220
chr10	22700001	22800000	ORNANAV1R3126
chr10	22700001	22800000	Vmn1r39
chr10	22700001	22800000	Vmn1r20
chr10	22700001	22800000	Vmn1r25
chr10	22700001	22800000	Vmn1r27
chr10	22700001	22800000	Vmn1r34
chr10	22700001	22800000	Vmn1r37
chr10	22700001	22800000	Vmn1r36
chr10	22700001	22800000	Vmn1r35
chr10	22700001	22800000	ORNANAV1R3147
chr10	22700001	22800000	ORNANAV1R3204
chr10	22700001	22800000	ORNANAV1R3079
chr10	22700001	22800000	Vmn1r66
chr10	22700001	22800000	ORYCUNV1R1546
chr10	22700001	22800000	ORNANAV1R3016
chr10	22700001	22800000	ORNANAV1R3034
chr10	22700001	22800000	ORNANAV1R3184
chr10	22700001	22800000	Zfp976
chr10	22700001	22800000	Rsl1
chr10	22700001	22800000	Zfp429
chr10	22700001	22800000	znf1147
chr10	22700001	22800000	Zfp953
chr10	22700001	22800000	Zfp759
chr10	22700001	22800000	Zfp51
chr10	22700001	22800000	Zfp455
chr10	22700001	22800000	znf1004
chr10	22700001	22800000	Zfp493
chr10	22700001	22800000	si:cabz01069013.3
chr10	22700001	22800000	ZNF718
chr10	22700001	22800000	Zfp616
chr10	22700001	22800000	Zfp942
chr10	22700001	22800000	Zfp944
chr10	22700001	22800000	zgc:174624
chr10	22700001	22800000	Rex2
chr10	22700001	22800000	znf484.L
chr10	22700001	22800000	zgc:173607
chr10	22700001	22800000	Zfp874b
chr10	22700001	22800000	RGD1566325
chr10	22700001	22800000	Zfp947
chr10	22700001	22800000	ZNF733P
chr10	22700001	22800000	Zfp456
chr10	22700001	22800000	ZNF714
chr10	22700001	22800000	Gm9805
chr10	22700001	22800000	znf983
chr10	22700001	22800000	Zfp65
chr10	22700001	22800000	Gm3604
chr10	22700001	22800000	Zfp931
chr10	22700001	22800000	znf1068
chr10	22700001	22800000	LOC100150619
chr10	22700001	22800000	Zfp735
chr10	22700001	22800000	Zfp987
chr10	22700001	22800000	zgc:173619
chr10	22700001	22800000	zgc:113295
chr10	22700001	22800000	znf1174
chr10	22700001	22800000	ZNF702P
chr10	22700001	22800000	Zfp708
chr10	22700001	22800000	Zfp991
chr10	22700001	22800000	Zfp992
chr10	22700001	22800000	Znf41-ps
chr10	22700001	22800000	Zfp457
chr10	22700001	22800000	ZNF322
chr10	22700001	22800000	Zfp981
chr10	22700001	22800000	Zfp595
chr10	22700001	22800000	Rslcan18
chr10	22700001	22800000	znf45l
chr10	22700001	22800000	zgc:171551
chr10	22700001	22800000	ZNF302
chr10	22700001	22800000	Zfp943
chr10	22700001	22800000	znf484
chr10	22700001	22800000	Zfp597
chr10	22700001	22800000	Zfp941
chr10	22700001	22800000	Zfp874a
chr10	22700001	22800000	ZNF137P
chr10	22700001	22800000	LOC680200
chr10	22700001	22800000	zgc:173486
chr10	22700001	22800000	Zfp97
chr10	22700001	22800000	znf1005
chr10	22700001	22800000	Zfp985
chr10	22700001	22800000	zgc:173816
chr10	22700001	22800000	Zfp72
chr10	22700001	22800000	LOC682870
chr10	22700001	22800000	monDomV1R1248
chr10	22700001	22800000	monDomV1R1219
chr10	22700001	22800000	monDomV1R1228
chr10	22700001	22800000	monDomV1R1261
chr10	22700001	22800000	ZNF431
chr10	22700001	22800000	Zfp790
chr10	22700001	22800000	ZNF610
chr10	22700001	22800000	ZNF595
chr10	22700001	22800000	ZNF716
chr10	22700001	22800000	Zfp729a
chr10	22700001	22800000	ORNANAV1R3160
chr10	22700001	22800000	ZNF841
chr10	22700001	22800000	ZNF611
chr10	22700001	22800000	ZNF107
chr10	22700001	22800000	ORNANAV1R3141
chr10	22700001	22800000	ZNF43
chr10	22700001	22800000	ZNF730
chr10	22700001	22800000	Zfp459
chr10	22700001	22800000	ORNANAV1R3010
chr10	22700001	22800000	Zfp120
chr10	22700001	22800000	ORNANAV1R3064
chr10	22700001	22800000	ZNF578
chr10	22700001	22800000	ZNF665
chr10	22700001	22800000	ZNF860
chr10	22700001	22800000	zf(c2h2)-32
chr10	22700001	22800000	ORNANAV1R3220
chr10	22700001	22800000	ZNF737
chr10	22700001	22800000	Vom1r90
chr10	22700001	22800000	ZNF257
chr10	22700001	22800000	monDomV1R1210
chr10	22700001	22800000	ZNF100
chr10	22700001	22800000	ZNF66
chr10	22700001	22800000	ZNF677
chr10	22700001	22800000	Zfp85
chr10	22700001	22800000	ZNF528
chr10	22700001	22800000	ORNANAV1R3191
chr10	22700001	22800000	ORNANAV1R3212
chr10	22700001	22800000	monDomV1R1254
chr10	22700001	22800000	monDomV1R1265
chr10	22700001	22800000	ORNANAV1R3111
chr10	22700001	22800000	ORNANAV1R3007
chr10	22700001	22800000	ORNANAV1R3254
chr10	22700001	22800000	LOC100191026
chr10	22700001	22800000	ZNF253
chr10	22700001	22800000	ORNANAV1R3158
chr10	22700001	22800000	zgc:174890
chr10	22700001	22800000	ZNF808
chr10	22700001	22800000	ORNANAV1R3237
chr10	22700001	22800000	ZNF879
chr10	22700001	22800000	ZNF724
chr10	22700001	22800000	ORNANAV1R3261
chr10	22700001	22800000	ZNF285
chr10	22700001	22800000	ZNF254
chr10	22700001	22800000	ORNANAV1R3011
chr10	22700001	22800000	ZNF430
chr10	22700001	22800000	ZNF836
chr10	22700001	22800000	ZNF682
chr10	22700001	22800000	ORNANAV1R3264
chr10	22700001	22800000	znf1059
chr10	22700001	22800000	Zfp58
chr10	22700001	22800000	ORNANAV1R3251
chr10	22700001	22800000	ZNF695
chr10	22700001	22800000	monDomV1R1212
chr10	22700001	22800000	ORNANAV1R3017
chr10	22700001	22800000	ZNF85
chr10	22700001	22800000	ZNF675
chr10	22700001	22800000	zf(c2h2)-13
chr10	22700001	22800000	zf(c2h2)-7
chr10	22700001	22800000	ZNF626
chr10	22700001	22800000	ZNF726
chr10	22700001	22800000	Zfp935
chr10	22700001	22800000	ORNANAV1R3052
chr10	22700001	22800000	ZNF818P
chr10	22700001	22800000	ORNANAV1R3151
chr10	22700001	22800000	ZNF721
chr10	22700001	22800000	Zfp729b
chr10	22700001	22800000	ZNF727
chr10	22700001	22800000	ORNANAV1R3234
chr10	22700001	22800000	monDomV1R1268
chr10	22700001	22800000	ORNANAV1R3020
chr10	22700001	22800000	ZNF28
chr10	22700001	22800000	ORNANAV1R3245
chr10	22700001	22800000	ZNF738
chr10	22700001	22800000	ORNANAV1R3198
chr10	22700001	22800000	Zfp160
chr10	22700001	22800000	ORNANAV1R3065
chr10	22700001	22800000	znf1041
chr10	22700001	22800000	ZNF600
chr10	22700001	22800000	GUSBP10
chr10	22700001	22800000	ZNF732
chr10	22700001	22800000	ZNF888
chr10	22700001	22800000	ZNF681
chr10	22700001	22800000	ORNANAV1R3131
chr10	22700001	22800000	ZNF91
chr10	22700001	22800000	Zfp267
chr10	22700001	22800000	RPSAP58
chr10	22700001	22800000	ORNANAV1R3249
chr10	22700001	22800000	ORNANAV1R3235
chr10	22700001	22800000	Zfp322a
chr10	22700001	22800000	ORNANAV1R3132
chr10	22700001	22800000	LOC582267
chr10	22700001	22800000	ORNANAV1R3187
chr10	22700001	22800000	ORNANAV1R3047
chr10	22700001	22800000	zf(c2h2)-138
chr10	22700001	22800000	LOC100301947
chr10	22700001	22800000	monDomV1R1241
chr10	22700001	22800000	ZNF680
chr10	22700001	22800000	ZNF480
chr10	22700001	22800000	zf(c2h2)-19
chr10	22700001	22800000	blf
chr10	22700001	22800000	ZNF57
chr10	22700001	22800000	znf1157
chr10	22700001	22800000	ZNF678
chr10	22700001	22800000	Vmn1r234
chr10	22700001	22800000	ZNF766
chr10	22700001	22800000	ERV3-1-ZNF117
chr10	22700001	22800000	Zfp11
chr10	22700001	22800000	ZNF816
chr10	22700001	22800000	ZFP2
chr10	22700001	22800000	Cavporv1r633
chr10	22700001	22800000	ORNANAV1R3080
chr10	22700001	22800000	monDomV1R1273
chr10	22700001	22800000	ORYCUNV1R1633
chr10	22700001	22800000	monDomV1R1215
chr10	22700001	22800000	Zfp229
chr10	22700001	22800000	Zfp53
chr10	22700001	22800000	LOC100336984
chr10	22700001	22800000	Gm10509
chr10	22700001	22800000	Gm16386
chr10	22700001	22800000	Zfp87
chr10	22700001	22800000	Zfp273
chr10	22700001	22800000	Zfp677
chr10	22700001	22800000	Zfp994
chr10	22700001	22800000	Zfp141
chr10	22700001	22800000	Zfp712
chr10	22700001	22800000	Zfp583
chr10	22700001	22800000	Zfp442
chr10	22700001	22800000	znf973
chr10	22700001	22800000	znf1001
chr10	22700001	22800000	LOC441666
chr10	22700001	22800000	ZNF876P
chr10	22700001	22800000	zgc:165514
chr10	22700001	22800000	zgc:113443
chr10	22700001	22800000	zgc:174650
chr10	22700001	22800000	zgc:174623
chr10	22700001	22800000	znf470
chr10	22700001	22800000	znf33a.L
chr10	22700001	22800000	zgc:136538
chr10	22700001	22800000	monDomV1R1231
chr10	22700001	22800000	Zfp473
chr10	22700001	22800000	ZNF596
chr10	22700001	22800000	ZNF492
chr10	22700001	22800000	ORNANAV1R3098
chr10	22700001	22800000	ZNF542P
chr10	22700001	22800000	ZNF723
chr10	22700001	22800000	monDomV1R1282
chr10	22700001	22800000	ORNANAV1R3128
chr10	22700001	22800000	ZNF729
chr10	22700001	22800000	Zfp354c
chr10	22700001	22800000	ZNF557
chr10	22700001	22800000	ZNF138
chr10	22700001	22800000	Zfp7
chr10	22700001	22800000	ZNF273
chr10	22700001	22800000	ZNF56
chr10	22700001	22800000	ORNANAV1R3066
chr10	22700001	22800000	monDomV1R1239
chr10	22700001	22800000	ZNF728
chr10	22700001	22800000	znf569.L
chr10	22700001	22800000	drll.1
chr10	22700001	22800000	ZNF90
chr10	22700001	22800000	ZNF880
chr10	22700001	22800000	ZNF506
chr10	22700001	22800000	ZNF479
chr10	22700001	22800000	ZNF676
chr10	22700001	22800000	ZNF354C
chr10	22700001	22800000	znf1113
chr10	22700001	22800000	drll.3
chr10	22700001	22800000	VN1R4
chr10	22700001	22800000	zgc:113220
chr10	22700001	22800000	zgc:112977
chr10	22700001	22800000	drl
chr10	22700001	22800000	zgc:113407
chr10	24300001	24400000	Ncr1
chr10	24300001	24400000	KIRDL8
chr10	24300001	24400000	KIR3DL17
chr10	24300001	24400000	Pira6
chr10	24300001	24400000	Pira2
chr10	24300001	24400000	Lilrc2
chr10	24300001	24400000	Lilrb4
chr10	24300001	24400000	LOC407171
chr10	24300001	24400000	KIR3DL10
chr10	24300001	24400000	KIR2DL3
chr10	24300001	24400000	KIR2DL1
chr10	24300001	24400000	Lilrb4a
chr10	24300001	24400000	KIR3DX1
chr10	24300001	24400000	LOC100192427
chr10	24300001	24400000	Lilr4b
chr10	24300001	24400000	LILRA2
chr10	24300001	24400000	LILRA1
chr10	24300001	24400000	LILRA3
chr10	24300001	24400000	KIR3DH
chr10	24300001	24400000	LILRA6
chr10	24300001	24400000	LILRAB
chr10	24300001	24400000	LILRB2
chr10	24300001	24400000	Kir3dl1
chr10	24300001	24400000	Lilra5
chr10	24300001	24400000	Gm14548
chr10	24300001	24400000	Pira11
chr10	24300001	24400000	Pira4
chr10	24300001	24400000	Pira7
chr10	24300001	24400000	Pira1
chr10	24300001	24400000	LILRA4
chr10	24300001	24400000	Lilrb3l
chr10	24300001	24400000	FCAR
chr10	39800001	39900000	snx14
chr10	39800001	39900000	snx14.L
chr12	16800001	16900000	OR4A15
chr12	16800001	16900000	Olfr1233
chr12	16800001	16900000	Olfr1383
chr12	16800001	16900000	Olfr1188
chr12	16800001	16900000	Olfr1392
chr12	16800001	16900000	Olr1397
chr12	16800001	16900000	Olr697
chr12	16800001	16900000	Olr696
chr12	16800001	16900000	Olr1692
chr12	16800001	16900000	Olr1388
chr12	16800001	16900000	OR2Y1
chr12	28200001	28300000	LOC100274662
chr12	32000001	32100000	MAS1L
chr12	35700001	35800000	Deaf1
chr12	35700001	35800000	TSPAN4
chr13	2700001	2800000	SDK1
chr14	23900001	24000000	gria1a
chr14	23900001	24000000	GluRIA
chr14	23900001	24000000	GRIA1
chr14	23900001	24000000	gria1b
chr14	58900001	59000000	EPB41L4A
chr14	58900001	59000000	epb41l4a.S
chr14	58900001	59000000	e41l4
chr14	82600001	82700000	Edil3
chr14	86500001	86600000	HOMER1
chr15	13800001	13900000	MAL
chr15	15300001	15400000	Anapc1
chr17	80400001	80500000	CDC16
chr2	9900001	10000000	AGBL4
chr2	91300001	91400000	Clgn
chr20	7700001	7800000	RREB1
chr20	13100001	13200000	Phactr1
chr20	13100001	13200000	phactr1.S
chr20	19600001	19700000	cdkal1
chr20	19600001	19700000	CG6550
chr20	19600001	19700000	cdkal
chr20	19600001	19700000	cdkal1.S
chr20	21400001	21500000	HDGF
chr20	21400001	21500000	HDGFL1
chr22	17900001	18000000	Gpcpd1
chr22	17900001	18000000	gpcpd1.L
chr22	25700001	25800000	Raly
chr23	6000001	6100000	SPATA31D5P
chr23	6000001	6100000	SPATA31D3
chr23	6000001	6100000	SPATA31D4
chr23	19400001	19500000	TRPM3
chr23	19500001	19600000	Trpm
chr23	19500001	19600000	trpm1a
chr23	19500001	19600000	trpm7
chr24	12200001	12300000	FUT8
chr24	19600001	19700000	Lin52
chr24	19600001	19700000	LOC100136175
chr24	32900001	33000000	FOXN3
chr24	32900001	33000000	foxn3.S
chr24	32900001	33000000	foxn3.L
chr24	32900001	33000000	ches1
chr24	35900001	36000000	CHGA
chr24	35900001	36000000	ITPK1
chr24	35900001	36000000	golga5
chr24	35900001	36000000	LGMN
chr24	36000001	36100000	itpk1a
chr24	47800001	47900000	LOC396781
chr24	47800001	47900000	ADAM6
chr24	47800001	47900000	Adam6b
chr24	47800001	47900000	Adam6a
chr24	47800001	47900000	IGHV1OR15-3
chr24	47800001	47900000	LOC642131
chr25	15400001	15500000	PALM2
chr25	15400001	15500000	PALM2-AKAP2
chr25	26500001	26600000	Olr1439
chr25	28200001	28300000	DENND1A
chr25	28200001	28300000	dennd1a.S
chr26	19900001	20000000	Ncam2
chr26	28700001	28800000	KRTAP20-2
chr26	28700001	28800000	Krtap6-2
chr26	28700001	28800000	KRTAP6-1
chr26	28700001	28800000	Gm10229
chr26	28700001	28800000	Gm10228
chr26	28700001	28800000	1110025L11Rik
chr26	28700001	28800000	Krtap6-5
chr26	28700001	28800000	KRTAP21-1
chr26	28700001	28800000	KRTAP6-3
chr26	28700001	28800000	Krtap16-3
chr26	28700001	28800000	Krtap19-1
chr26	28700001	28800000	Krtap19-5
chr26	28700001	28800000	KAP6.1.1
chr26	28700001	28800000	Gm9789
chr26	28700001	28800000	KRTAP19-6
chr26	28700001	28800000	Krtap19-4
chr26	28700001	28800000	Krtap19-2
chr26	28700001	28800000	Krtap19-9b
chr28	7400001	7500000	Syt1
chr28	36000001	36100000	Triobp
chr3	36700001	36800000	Spg7
chr3	36700001	36800000	Y47C4A.1
chr3	46100001	46200000	GRID2
chr3	59700001	59800000	Fras1
chr30	11100001	11200000	MARK1
chr30	11100001	11200000	mark1.S
chr30	11100001	11200000	mark2.L
chr30	14700001	14800000	CG13560
chr30	14700001	14800000	TGFB2
chr30	14700001	14800000	tgfb1b
chr30	14700001	14800000	RRP15
chr4	69500001	69600000	immp2l.L
chr4	69500001	69600000	IMMP2L
chr4	100100001	100200000	cntnap2b
chr4	100100001	100200000	cntnap2
chr4	100100001	100200000	cntnap2a
chr5	86700001	86800000	NEGR1
chr6	3200001	3300000	IKZF2
chr6	39400001	39500000	Magohb
chr6	39400001	39500000	KLRAP1
chr6	39400001	39500000	LY49
chr6	39400001	39500000	KLRA1
chr6	39400001	39500000	KLRA1P
chr6	39400001	39500000	MAGOH
chr6	48600001	48700000	slco1f2
chr6	48600001	48700000	Slco1a5
chr6	48600001	48700000	slco1c1
chr6	48600001	48700000	slco1b3
chr6	48600001	48700000	SLCO1B1
chr6	48600001	48700000	SLCO1A2
chr6	48600001	48700000	slco1d1
chr6	48600001	48700000	slco1f3
chr6	48600001	48700000	slco1f1
chr6	73000001	73100000	Olfr305
chr6	73000001	73100000	Olr29
chr6	73000001	73100000	Olfr223
chr6	73000001	73100000	Olfr294
chr6	73000001	73100000	Olr1431
chr6	73000001	73100000	or11l1.L
chr6	73000001	73100000	Olr1029
chr6	73000001	73100000	Olr10
chr6	73100001	73200000	Olfr794
chr6	73100001	73200000	Olr889
chr6	79300001	79400000	Tafa2
chr7	26100001	26200000	Dscaml1
chr7	26100001	26200000	dscama
chr7	27100001	27200000	DDX6
chr7	27200001	27300000	Bcl9l
chr7	30800001	30900000	JHY
chr7	30800001	30900000	Crtam
chr7	30800001	30900000	ubash3bb
chr7	30800001	30900000	hsc70
chr7	30800001	30900000	UBASH3B
chr7	30900001	31000000	Hsp70
chr7	30900001	31000000	bsx
chr7	30900001	31000000	hsc70.ii
chr7	31100001	31200000	Clmp
chr7	34700001	34800000	PKNOX2
chr7	75700001	75800000	OLR108
chr7	75700001	75800000	LOC104939064
chr7	75700001	75800000	OR52N2
chr7	75700001	75800000	OR51M1
chr7	90700001	90800000	NELL1
chr7	90700001	90800000	nell1.S
chr7	90700001	90800000	nell1.L
chr7	90700001	90800000	nell2b
chr8	3700001	3800000	CG13248
chr8	3700001	3800000	SLC7A4
chr8	3700001	3800000	ZBP1
chr8	3700001	3800000	P2rx6
chr8	3700001	3800000	TET2
chr8	3700001	3800000	KLHL7-DT
chr8	3700001	3800000	LOC100288637
chr8	3700001	3800000	ZNF121
chr8	3800001	3900000	LOC100164077
chr8	3800001	3900000	CCR5AS
chr8	3800001	3900000	THAP7-AS1
chr8	3800001	3900000	CYYR1-AS1
chr8	4400001	4500000	LRRC74B
chr8	4400001	4500000	CG5535
chr8	4400001	4500000	LOC101927356
chr8	4400001	4500000	TUBA3FP
chr8	8400001	8500000	SLC35E4
chr8	29400001	29500000	Tmem132c
chr8	29400001	29500000	TMEM132D
chr9	7800001	7900000	Tpd52
chr9	7800001	7900000	tpd52.L
chr9	7800001	7900000	tpd52.S
chr9	7800001	7900000	LINC01925
chr9	7900001	8000000	stmn1
chr9	22800001	22900000	Nkain3
chr9	22800001	22900000	nkain4
chr9	22800001	22900000	nkain4.S
chr9	22900001	23000000	zgc:100920
chr9	58700001	58800000	CSMD3
chr9	84500001	84600000	ZNF891

## Sheet: AMH
chr1	7000001	7100000	8	8e-05
chr1	53200001	53300000	1	1e-05
chr1	73700001	73800000	7	7e-05
chr1	98500001	98600000	11	0.00011
chr1	116600001	116700000	2	2e-05
chr1	126800001	126900000	4	4e-05
chr1	126900001	127000000	6	6e-05
chr1	134800001	134900000	11	0.00011
chr1	142500001	142600000	4	4e-05
chr1	142800001	142900000	2	2e-05
chr1	151700001	151800000	3	3e-05
chr1	151800001	151900000	3	3e-05
chr1	177300001	177400000	7	7e-05
chr1	178600001	178700000	2	2e-05
chr10	22700001	22800000	12	0.00012
chr10	30100001	30200000	3	3e-05
chr10	34700001	34800000	1	1e-05
chr10	34800001	34900000	5	5e-05
chr10	39800001	39900000	5	5e-05
chr10	47400001	47500000	5	5e-05
chr11	27700001	27800000	11	0.00011
chr11	27800001	27900000	1	1e-05
chr11	49200001	49300000	8	8e-05
chr12	28200001	28300000	5	5e-05
chr13	28700001	28800000	8	8e-05
chr14	59100001	59200000	9	9e-05
chr14	82600001	82700000	7	7e-05
chr14	86500001	86600000	1	1e-05
chr14	86600001	86700000	8	8e-05
chr15	6200001	6300000	6	6e-05
chr15	6500001	6600000	3	3e-05
chr15	13800001	13900000	11	0.00011
chr15	15300001	15400000	1	1e-05
chr15	19300001	19400000	1	1e-05
chr15	27700001	27800000	3	3e-05
chr15	74200001	74300000	2	2e-05
chr17	80700001	80800000	10	0.0001
chr19	31500001	31600000	5	5e-05
chr19	44200001	44300000	1	1e-05
chr2	31300001	31400000	12	0.00012
chr2	61200001	61300000	3	3e-05
chr2	71900001	72000000	1	1e-05
chr2	91300001	91400000	2	2e-05
chr2	111700001	111800000	8	8e-05
chr2	112800001	112900000	2	2e-05
chr20	4300001	4400000	7	7e-05
chr20	7700001	7800000	1	1e-05
chr20	13400001	13500000	4	4e-05
chr20	21300001	21400000	9	9e-05
chr20	21400001	21500000	3	3e-05
chr21	23600001	23700000	7	7e-05
chr22	8000001	8100000	12	0.00012
chr22	17900001	18000000	1	1e-05
chr22	25700001	25800000	3	3e-05
chr22	42900001	43000000	9	9e-05
chr23	6000001	6100000	7	7e-05
chr23	15900001	16000000	7	7e-05
chr23	45200001	45300000	6	6e-05
chr23	45300001	45400000	9	9e-05
chr24	32900001	33000000	1	1e-05
chr24	35900001	36000000	2	2e-05
chr25	14200001	14300000	7	7e-05
chr25	28200001	28300000	1	1e-05
chr25	28300001	28400000	3	3e-05
chr26	2200001	2300000	4	4e-05
chr26	16500001	16600000	2	2e-05
chr26	19900001	20000000	9	9e-05
chr26	28700001	28800000	5	5e-05
chr26	28800001	28900000	6	6e-05
chr28	7300001	7400000	1	1e-05
chr28	7400001	7500000	8	8e-05
chr28	16100001	16200000	1	1e-05
chr28	36000001	36100000	5	5e-05
chr29	11500001	11600000	2	2e-05
chr3	46600001	46700000	5	5e-05
chr3	46700001	46800000	1	1e-05
chr3	85000001	85100000	1	1e-05
chr30	11100001	11200000	9	9e-05
chr30	14700001	14800000	4	4e-05
chr30	25200001	25300000	2	2e-05
chr30	25300001	25400000	7	7e-05
chr31	26000001	26100000	1	1e-05
chr4	21900001	22000000	3	3e-05
chr4	43800001	43900000	13	0.00013
chr4	100100001	100200000	7	7e-05
chr6	3200001	3300000	5	5e-05
chr6	12400001	12500000	10	0.0001
chr6	13700001	13800000	1	1e-05
chr6	39400001	39500000	13	0.00013
chr6	46700001	46800000	13	0.00013
chr6	49100001	49200000	11	0.00011
chr6	73000001	73100000	5	5e-05
chr6	79200001	79300000	3	3e-05
chr6	79300001	79400000	10	0.0001
chr7	26100001	26200000	10	0.0001
chr7	27200001	27300000	5	5e-05
chr7	30800001	30900000	7	7e-05
chr7	30900001	31000000	6	6e-05
chr7	34700001	34800000	6	6e-05
chr7	60300001	60400000	1	1e-05
chr7	90700001	90800000	2	2e-05
chr8	29400001	29500000	1	1e-05
chr9	7800001	7900000	4	4e-05
chr9	7900001	8000000	3	3e-05
chr9	20300001	20400000	1	1e-05
chr9	65800001	65900000	2	2e-05
chr9	66800001	66900000	1	1e-05

## Sheet: AMHgenes
chr1	7000001	7100000	ADAM12
chr1	7000001	7100000	Adam12
chr1	98500001	98600000	SV2B
chr1	142800001	142900000	MYEF2
chr1	142800001	142900000	slc24a4a
chr1	142800001	142900000	dut.L
chr1	142800001	142900000	DUT
chr1	142800001	142900000	SLC12A1
chr1	142800001	142900000	dut-1
chr1	151700001	151800000	LOC100289495
chr1	151700001	151800000	TIGD1
chr1	151700001	151800000	COA1
chr1	151700001	151800000	NR3C2
chr1	151700001	151800000	ASPA
chr1	151700001	151800000	MIA2
chr1	151700001	151800000	ZNF621
chr10	22700001	22800000	ZNF117
chr10	22700001	22800000	monDomV1R1208
chr10	22700001	22800000	ZNF708
chr10	22700001	22800000	ZNF415
chr10	22700001	22800000	ORNANAV1R3012
chr10	22700001	22800000	monDomV1R1238
chr10	22700001	22800000	monDomV1R1237
chr10	22700001	22800000	ZNF92
chr10	22700001	22800000	ORNANAV1R3248
chr10	22700001	22800000	monDomV1R1211
chr10	22700001	22800000	ZNF98
chr10	22700001	22800000	ZNF160
chr10	22700001	22800000	zgc:162958
chr10	22700001	22800000	ZNF99
chr10	22700001	22800000	ZNF761
chr10	22700001	22800000	ZNF83
chr10	22700001	22800000	ZNF468
chr10	22700001	22800000	ZNF616
chr10	22700001	22800000	ZNF493
chr10	22700001	22800000	monDomV1R1229
chr10	22700001	22800000	ZNF534
chr10	22700001	22800000	ZNF93
chr10	22700001	22800000	monDomV1R1227
chr10	22700001	22800000	monDomV1R1222
chr10	22700001	22800000	monDomV1R1214
chr10	22700001	22800000	ZNF429
chr10	22700001	22800000	ZNF845
chr10	22700001	22800000	monDomV1R1246
chr10	22700001	22800000	monDomV1R1213
chr10	22700001	22800000	monDomV1R1251
chr10	22700001	22800000	ZNF486
chr10	22700001	22800000	Zfp54
chr10	22700001	22800000	ZNF347
chr10	22700001	22800000	Zfp948
chr10	22700001	22800000	monDomV1R1209
chr10	22700001	22800000	ORYCUNV1R1535
chr10	22700001	22800000	Cavporv1r625
chr10	22700001	22800000	Vmn1r224
chr10	22700001	22800000	ORYCUNV1R1570
chr10	22700001	22800000	ORYCUNV1R1620
chr10	22700001	22800000	ORYCUNV1R1647
chr10	22700001	22800000	ORYCUNV1R1624
chr10	22700001	22800000	ORYCUNV1R1573
chr10	22700001	22800000	ORYCUNV1R1600
chr10	22700001	22800000	ORYCUNV1R1527
chr10	22700001	22800000	ORYCUNV1R1504
chr10	22700001	22800000	ORYCUNV1R1560
chr10	22700001	22800000	ORYCUNV1R1576
chr10	22700001	22800000	ORYCUNV1R1634
chr10	22700001	22800000	ORYCUNV1R1502
chr10	22700001	22800000	ORYCUNV1R1636
chr10	22700001	22800000	ORYCUNV1R1591
chr10	22700001	22800000	ORYCUNV1R1642
chr10	22700001	22800000	ORYCUNV1R1619
chr10	22700001	22800000	ORYCUNV1R1611
chr10	22700001	22800000	Cavporv1r640
chr10	22700001	22800000	PONPYGV1R1805
chr10	22700001	22800000	LINC02190
chr10	22700001	22800000	ORYCUNV1R1631
chr10	22700001	22800000	Cavporv1r616
chr10	22700001	22800000	Cavporv1r684
chr10	22700001	22800000	Cavporv1r617
chr10	22700001	22800000	ORYCUNV1R1657
chr10	22700001	22800000	monDomV1R1232
chr10	22700001	22800000	Cavporv1r615
chr10	22700001	22800000	ORYCUNV1R1583
chr10	22700001	22800000	ORNANAV1R3282
chr10	22700001	22800000	ORNANAV1R3100
chr10	22700001	22800000	ORNANAV1R3073
chr10	22700001	22800000	Cavporv1r624
chr10	22700001	22800000	ORNANAV1R3077
chr10	22700001	22800000	ORNANAV1R3257
chr10	22700001	22800000	ORNANAV1R3032
chr10	22700001	22800000	ORNANAV1R3273
chr10	22700001	22800000	ORNANAV1R3226
chr10	22700001	22800000	ORNANAV1R3059
chr10	22700001	22800000	ORNANAV1R3210
chr10	22700001	22800000	ORNANAV1R3178
chr10	22700001	22800000	ORNANAV1R3039
chr10	22700001	22800000	ORNANAV1R3278
chr10	22700001	22800000	ORNANAV1R3270
chr10	22700001	22800000	ORNANAV1R3269
chr10	22700001	22800000	ORYCUNV1R1664
chr10	22700001	22800000	ORYCUNV1R1668
chr10	22700001	22800000	Cavporv1r628
chr10	22700001	22800000	ORYCUNV1R1615
chr10	22700001	22800000	monDomV1R1294
chr10	22700001	22800000	Vmn1r235
chr10	22700001	22800000	Vmn1r70
chr10	22700001	22800000	ORNANAV1R3168
chr10	22700001	22800000	ORNANAV1R3042
chr10	22700001	22800000	ORYCUNV1R1658
chr10	22700001	22800000	FELCATV1R13
chr10	22700001	22800000	Cavporv1r635
chr10	22700001	22800000	PONPYGV1R1804
chr10	22700001	22800000	Vmn1r225
chr10	22700001	22800000	Cavporv1r637
chr10	22700001	22800000	Vmn1r233
chr10	22700001	22800000	Vom1r17
chr10	22700001	22800000	monDomV1R1292
chr10	22700001	22800000	monDomV1R1291
chr10	22700001	22800000	monDomV1R1284
chr10	22700001	22800000	monDomV1R1286
chr10	22700001	22800000	monDomV1R1288
chr10	22700001	22800000	monDomV1R1285
chr10	22700001	22800000	monDomV1R1287
chr10	22700001	22800000	monDomV1R1295
chr10	22700001	22800000	Cavporv1r621
chr10	22700001	22800000	monDomV1R1267
chr10	22700001	22800000	monDomV1R1266
chr10	22700001	22800000	Vmn1r80
chr10	22700001	22800000	Cavporv1r685
chr10	22700001	22800000	ORNANAV1R3054
chr10	22700001	22800000	ORNANAV1R3207
chr10	22700001	22800000	ORNANAV1R3031
chr10	22700001	22800000	ORNANAV1R3069
chr10	22700001	22800000	ORNANAV1R3044
chr10	22700001	22800000	ORNANAV1R3082
chr10	22700001	22800000	ORNANAV1R3135
chr10	22700001	22800000	ORNANAV1R3190
chr10	22700001	22800000	ORNANAV1R3258
chr10	22700001	22800000	monDomV1R1293
chr10	22700001	22800000	monDomV1R1290
chr10	22700001	22800000	monDomV1R1220
chr10	22700001	22800000	ORNANAV1R3126
chr10	22700001	22800000	Vmn1r39
chr10	22700001	22800000	Vmn1r20
chr10	22700001	22800000	Vmn1r25
chr10	22700001	22800000	Vmn1r27
chr10	22700001	22800000	Vmn1r34
chr10	22700001	22800000	Vmn1r37
chr10	22700001	22800000	Vmn1r36
chr10	22700001	22800000	Vmn1r35
chr10	22700001	22800000	ORNANAV1R3147
chr10	22700001	22800000	ORNANAV1R3204
chr10	22700001	22800000	ORNANAV1R3079
chr10	22700001	22800000	Vmn1r66
chr10	22700001	22800000	ORYCUNV1R1546
chr10	22700001	22800000	ORNANAV1R3016
chr10	22700001	22800000	ORNANAV1R3034
chr10	22700001	22800000	ORNANAV1R3184
chr10	22700001	22800000	Vmn1r236
chr10	22700001	22800000	Zfp458
chr10	22700001	22800000	Zfp976
chr10	22700001	22800000	Rsl1
chr10	22700001	22800000	Zfp429
chr10	22700001	22800000	Zfp748
chr10	22700001	22800000	Zfp945
chr10	22700001	22800000	znf1147
chr10	22700001	22800000	Zfp953
chr10	22700001	22800000	Zfp759
chr10	22700001	22800000	Zfp51
chr10	22700001	22800000	Zfp455
chr10	22700001	22800000	znf1004
chr10	22700001	22800000	Zfp493
chr10	22700001	22800000	si:cabz01069013.3
chr10	22700001	22800000	ZNF718
chr10	22700001	22800000	Zfp616
chr10	22700001	22800000	Zfp942
chr10	22700001	22800000	Zfp944
chr10	22700001	22800000	zgc:174624
chr10	22700001	22800000	Zfp600
chr10	22700001	22800000	Rex2
chr10	22700001	22800000	Gm7072
chr10	22700001	22800000	znf484.L
chr10	22700001	22800000	zgc:173607
chr10	22700001	22800000	Zfp874b
chr10	22700001	22800000	RGD1566325
chr10	22700001	22800000	Zfp947
chr10	22700001	22800000	ZNF733P
chr10	22700001	22800000	Zfp456
chr10	22700001	22800000	ZNF714
chr10	22700001	22800000	Gm9805
chr10	22700001	22800000	znf983
chr10	22700001	22800000	Zfp65
chr10	22700001	22800000	Gm3604
chr10	22700001	22800000	Zfp931
chr10	22700001	22800000	znf1068
chr10	22700001	22800000	LOC100150619
chr10	22700001	22800000	Zfp738
chr10	22700001	22800000	Zfp735
chr10	22700001	22800000	Zfp987
chr10	22700001	22800000	zgc:173619
chr10	22700001	22800000	zgc:113295
chr10	22700001	22800000	znf1174
chr10	22700001	22800000	ZNF702P
chr10	22700001	22800000	Zfp708
chr10	22700001	22800000	Zfp991
chr10	22700001	22800000	Zfp992
chr10	22700001	22800000	Znf41-ps
chr10	22700001	22800000	Zfp457
chr10	22700001	22800000	ZNF322
chr10	22700001	22800000	Zfp981
chr10	22700001	22800000	Zfp40
chr10	22700001	22800000	Zfp595
chr10	22700001	22800000	Rslcan18
chr10	22700001	22800000	znf45l
chr10	22700001	22800000	zgc:171551
chr10	22700001	22800000	ZNF302
chr10	22700001	22800000	Zfp943
chr10	22700001	22800000	znf484
chr10	22700001	22800000	Zfp597
chr10	22700001	22800000	Zfp941
chr10	22700001	22800000	Zfp874a
chr10	22700001	22800000	ZNF137P
chr10	22700001	22800000	LOC680200
chr10	22700001	22800000	zgc:173486
chr10	22700001	22800000	Zfp97
chr10	22700001	22800000	znf1005
chr10	22700001	22800000	Zfp985
chr10	22700001	22800000	zgc:173816
chr10	22700001	22800000	Zfp72
chr10	22700001	22800000	LOC682870
chr10	22700001	22800000	monDomV1R1248
chr10	22700001	22800000	monDomV1R1219
chr10	22700001	22800000	monDomV1R1228
chr10	22700001	22800000	monDomV1R1206
chr10	22700001	22800000	monDomV1R1243
chr10	22700001	22800000	monDomV1R1261
chr10	22700001	22800000	monDomV1R1204
chr10	22700001	22800000	ZNF431
chr10	22700001	22800000	Zfp982
chr10	22700001	22800000	Zfp790
chr10	22700001	22800000	ZNF610
chr10	22700001	22800000	ZNF701
chr10	22700001	22800000	ZNF595
chr10	22700001	22800000	ZNF716
chr10	22700001	22800000	Zfp729a
chr10	22700001	22800000	ZNF320
chr10	22700001	22800000	monDomV1R1236
chr10	22700001	22800000	ZNF267
chr10	22700001	22800000	ORNANAV1R3160
chr10	22700001	22800000	ZNF841
chr10	22700001	22800000	ZNF765
chr10	22700001	22800000	ZNF611
chr10	22700001	22800000	ZNF107
chr10	22700001	22800000	ORNANAV1R3141
chr10	22700001	22800000	ZNF43
chr10	22700001	22800000	ZNF730
chr10	22700001	22800000	Zfp459
chr10	22700001	22800000	ORNANAV1R3010
chr10	22700001	22800000	Zfp120
chr10	22700001	22800000	ORNANAV1R3064
chr10	22700001	22800000	ZNF578
chr10	22700001	22800000	ZNF665
chr10	22700001	22800000	ZNF860
chr10	22700001	22800000	zf(c2h2)-32
chr10	22700001	22800000	ORNANAV1R3220
chr10	22700001	22800000	ZNF737
chr10	22700001	22800000	Vom1r90
chr10	22700001	22800000	ZNF257
chr10	22700001	22800000	monDomV1R1210
chr10	22700001	22800000	ZNF100
chr10	22700001	22800000	ZNF66
chr10	22700001	22800000	ZNF677
chr10	22700001	22800000	Zfp85
chr10	22700001	22800000	ZNF525
chr10	22700001	22800000	ZNF528
chr10	22700001	22800000	monDomV1R1283
chr10	22700001	22800000	ORNANAV1R3191
chr10	22700001	22800000	ORNANAV1R3212
chr10	22700001	22800000	ZNF765-ZNF761
chr10	22700001	22800000	monDomV1R1254
chr10	22700001	22800000	monDomV1R1265
chr10	22700001	22800000	ORNANAV1R3111
chr10	22700001	22800000	ORNANAV1R3007
chr10	22700001	22800000	ORNANAV1R3254
chr10	22700001	22800000	LOC100191026
chr10	22700001	22800000	ZNF253
chr10	22700001	22800000	ORNANAV1R3158
chr10	22700001	22800000	zgc:174890
chr10	22700001	22800000	ZNF808
chr10	22700001	22800000	ORNANAV1R3237
chr10	22700001	22800000	ZNF879
chr10	22700001	22800000	ZNF724
chr10	22700001	22800000	ZNF208
chr10	22700001	22800000	ORNANAV1R3261
chr10	22700001	22800000	ZNF285
chr10	22700001	22800000	ZNF813
chr10	22700001	22800000	ZNF254
chr10	22700001	22800000	ORNANAV1R3011
chr10	22700001	22800000	ZNF430
chr10	22700001	22800000	ZNF836
chr10	22700001	22800000	ZNF682
chr10	22700001	22800000	ORNANAV1R3264
chr10	22700001	22800000	znf1059
chr10	22700001	22800000	Zfp58
chr10	22700001	22800000	ORNANAV1R3251
chr10	22700001	22800000	ZNF695
chr10	22700001	22800000	monDomV1R1212
chr10	22700001	22800000	ORNANAV1R3017
chr10	22700001	22800000	ZNF85
chr10	22700001	22800000	ZNF675
chr10	22700001	22800000	zf(c2h2)-13
chr10	22700001	22800000	zf(c2h2)-7
chr10	22700001	22800000	ZNF626
chr10	22700001	22800000	ZNF726
chr10	22700001	22800000	Zfp935
chr10	22700001	22800000	ORNANAV1R3052
chr10	22700001	22800000	ZNF818P
chr10	22700001	22800000	ORNANAV1R3151
chr10	22700001	22800000	ZNF721
chr10	22700001	22800000	Zfp729b
chr10	22700001	22800000	ZNF727
chr10	22700001	22800000	ORNANAV1R3234
chr10	22700001	22800000	monDomV1R1268
chr10	22700001	22800000	ORNANAV1R3020
chr10	22700001	22800000	ZNF28
chr10	22700001	22800000	ORNANAV1R3245
chr10	22700001	22800000	ZNF738
chr10	22700001	22800000	ORNANAV1R3198
chr10	22700001	22800000	Zfp160
chr10	22700001	22800000	ORNANAV1R3065
chr10	22700001	22800000	znf1041
chr10	22700001	22800000	ZNF600
chr10	22700001	22800000	GUSBP10
chr10	22700001	22800000	ZNF732
chr10	22700001	22800000	ZNF888
chr10	22700001	22800000	ZNF681
chr10	22700001	22800000	ORNANAV1R3131
chr10	22700001	22800000	ZNF91
chr10	22700001	22800000	Zfp267
chr10	22700001	22800000	RPSAP58
chr10	22700001	22800000	ORNANAV1R3249
chr10	22700001	22800000	ORNANAV1R3235
chr10	22700001	22800000	Zfp322a
chr10	22700001	22800000	ORNANAV1R3132
chr10	22700001	22800000	LOC582267
chr10	22700001	22800000	ORNANAV1R3187
chr10	22700001	22800000	ORNANAV1R3047
chr10	22700001	22800000	zf(c2h2)-138
chr10	22700001	22800000	LOC100301947
chr10	22700001	22800000	monDomV1R1241
chr10	22700001	22800000	ZNF680
chr10	22700001	22800000	ZNF480
chr10	22700001	22800000	zf(c2h2)-19
chr10	22700001	22800000	blf
chr10	22700001	22800000	ZNF57
chr10	22700001	22800000	ORYCUNV1R1545
chr10	22700001	22800000	znf1157
chr10	22700001	22800000	ZNF678
chr10	22700001	22800000	Vmn1r234
chr10	22700001	22800000	ZNF766
chr10	22700001	22800000	ERV3-1-ZNF117
chr10	22700001	22800000	Zfp11
chr10	22700001	22800000	ZNF816
chr10	22700001	22800000	ZFP2
chr10	22700001	22800000	Zfp52
chr10	22700001	22800000	Gm2381
chr10	22700001	22800000	Zfp719
chr10	22700001	22800000	Cavporv1r633
chr10	22700001	22800000	ORNANAV1R3080
chr10	22700001	22800000	monDomV1R1273
chr10	22700001	22800000	ORYCUNV1R1633
chr10	22700001	22800000	monDomV1R1215
chr10	22700001	22800000	Zfp229
chr10	22700001	22800000	Zfp53
chr10	22700001	22800000	LOC100336984
chr10	22700001	22800000	Gm10509
chr10	22700001	22800000	Zfp946
chr10	22700001	22800000	Gm16386
chr10	22700001	22800000	Zfp87
chr10	22700001	22800000	Zfp273
chr10	22700001	22800000	Zfp677
chr10	22700001	22800000	Zfp994
chr10	22700001	22800000	Zfp980
chr10	22700001	22800000	Gm13212
chr10	22700001	22800000	Zfp141
chr10	22700001	22800000	Zfp712
chr10	22700001	22800000	Zfp583
chr10	22700001	22800000	Zfp442
chr10	22700001	22800000	znf973
chr10	22700001	22800000	znf1001
chr10	22700001	22800000	LOC441666
chr10	22700001	22800000	ZNF876P
chr10	22700001	22800000	zgc:165514
chr10	22700001	22800000	zgc:113443
chr10	22700001	22800000	zgc:174650
chr10	22700001	22800000	zgc:174623
chr10	22700001	22800000	znf470
chr10	22700001	22800000	znf33a.L
chr10	22700001	22800000	zgc:136538
chr10	22700001	22800000	monDomV1R1231
chr10	22700001	22800000	monDomV1R1230
chr10	22700001	22800000	Zfp473
chr10	22700001	22800000	ZNF596
chr10	22700001	22800000	ZNF492
chr10	22700001	22800000	ORNANAV1R3098
chr10	22700001	22800000	ZNF542P
chr10	22700001	22800000	ZNF723
chr10	22700001	22800000	ZNF594
chr10	22700001	22800000	monDomV1R1282
chr10	22700001	22800000	ORNANAV1R3128
chr10	22700001	22800000	ZNF729
chr10	22700001	22800000	Zfp354c
chr10	22700001	22800000	ZNF557
chr10	22700001	22800000	ZNF138
chr10	22700001	22800000	Zfp7
chr10	22700001	22800000	ZNF273
chr10	22700001	22800000	ZNF56
chr10	22700001	22800000	LOC100216020
chr10	22700001	22800000	ORNANAV1R3066
chr10	22700001	22800000	monDomV1R1239
chr10	22700001	22800000	ZNF728
chr10	22700001	22800000	znf569.L
chr10	22700001	22800000	drll.1
chr10	22700001	22800000	ZNF90
chr10	22700001	22800000	ZNF880
chr10	22700001	22800000	ZNF506
chr10	22700001	22800000	ZNF479
chr10	22700001	22800000	ZNF676
chr10	22700001	22800000	ORNANAV1R3130
chr10	22700001	22800000	ZNF354C
chr10	22700001	22800000	znf1113
chr10	22700001	22800000	ZNF585B
chr10	22700001	22800000	drll.3
chr10	22700001	22800000	VN1R4
chr10	22700001	22800000	zgc:113220
chr10	22700001	22800000	zgc:112977
chr10	22700001	22800000	drl
chr10	22700001	22800000	zgc:113407
chr10	39800001	39900000	snx14
chr10	39800001	39900000	snx14.L
chr12	28200001	28300000	LOC100274662
chr14	59100001	59200000	EPB41L4A
chr14	59100001	59200000	epb41l4a.S
chr14	59100001	59200000	e41l4
chr14	82600001	82700000	Edil3
chr14	86500001	86600000	HOMER1
chr15	13800001	13900000	MAL
chr15	15300001	15400000	Anapc1
chr2	91300001	91400000	Clgn
chr20	7700001	7800000	RREB1
chr20	21400001	21500000	HDGF
chr20	21400001	21500000	HDGFL1
chr22	17900001	18000000	Gpcpd1
chr22	17900001	18000000	gpcpd1.L
chr22	25700001	25800000	Raly
chr23	6000001	6100000	SPATA31D5P
chr23	6000001	6100000	SPATA31D3
chr23	6000001	6100000	SPATA31D4
chr24	32900001	33000000	FOXN3
chr24	32900001	33000000	foxn3.S
chr24	32900001	33000000	foxn3.L
chr24	32900001	33000000	ches1
chr24	35900001	36000000	CHGA
chr24	35900001	36000000	ITPK1
chr24	35900001	36000000	golga5
chr24	35900001	36000000	LGMN
chr25	28200001	28300000	DENND1A
chr25	28200001	28300000	dennd1a.S
chr26	19900001	20000000	Ncam2
chr26	28700001	28800000	KRTAP20-2
chr26	28700001	28800000	Krtap6-2
chr26	28700001	28800000	KRTAP6-1
chr26	28700001	28800000	Gm10229
chr26	28700001	28800000	Gm10228
chr26	28700001	28800000	1110025L11Rik
chr26	28700001	28800000	Krtap6-5
chr26	28700001	28800000	KRTAP21-1
chr26	28700001	28800000	KRTAP6-3
chr26	28700001	28800000	Krtap16-3
chr26	28700001	28800000	Krtap19-1
chr26	28700001	28800000	Krtap19-5
chr26	28700001	28800000	KAP6.1.1
chr26	28700001	28800000	Gm9789
chr26	28700001	28800000	KRTAP19-6
chr26	28700001	28800000	Krtap19-4
chr26	28700001	28800000	Krtap19-2
chr26	28700001	28800000	Krtap19-9b
chr28	7400001	7500000	Syt1
chr28	36000001	36100000	Triobp
chr3	46600001	46700000	GRID2
chr30	11100001	11200000	MARK1
chr30	11100001	11200000	mark1.S
chr30	11100001	11200000	mark2.L
chr30	14700001	14800000	CG13560
chr30	14700001	14800000	TGFB2
chr30	14700001	14800000	tgfb1b
chr30	14700001	14800000	RRP15
chr4	100100001	100200000	cntnap2b
chr4	100100001	100200000	cntnap2
chr4	100100001	100200000	cntnap2a
chr6	3200001	3300000	IKZF2
chr6	39400001	39500000	Magohb
chr6	39400001	39500000	KLRAP1
chr6	39400001	39500000	LY49
chr6	39400001	39500000	KLRA1
chr6	39400001	39500000	KLRA1P
chr6	39400001	39500000	MAGOH
chr6	73000001	73100000	Olfr305
chr6	73000001	73100000	Olr29
chr6	73000001	73100000	Olfr223
chr6	73000001	73100000	Olfr294
chr6	73000001	73100000	Olr1431
chr6	73000001	73100000	or11l1.L
chr6	73000001	73100000	Olr1029
chr6	73000001	73100000	Olr10
chr6	79300001	79400000	Tafa2
chr7	26100001	26200000	Dscaml1
chr7	26100001	26200000	dscama
chr7	27200001	27300000	Bcl9l
chr7	30800001	30900000	JHY
chr7	30800001	30900000	Crtam
chr7	30800001	30900000	ubash3bb
chr7	30800001	30900000	hsc70
chr7	30800001	30900000	UBASH3B
chr7	30900001	31000000	Hsp70
chr7	30900001	31000000	bsx
chr7	30900001	31000000	hsc70.ii
chr7	34700001	34800000	PKNOX2
chr7	90700001	90800000	NELL1
chr7	90700001	90800000	nell1.S
chr7	90700001	90800000	nell1.L
chr7	90700001	90800000	nell2b
chr8	29400001	29500000	Tmem132c
chr8	29400001	29500000	TMEM132D
chr9	7800001	7900000	Tpd52
chr9	7800001	7900000	tpd52.L
chr9	7800001	7900000	tpd52.S
chr9	7800001	7900000	LINC01925
chr9	7900001	8000000	stmn1

[truncated: 2 more sheets: TWH, TWHgenes]
